# Supplementary material for: Autoridad única: la Comisión Nacional de Competencia. Funciones del Consejo y de la Dirección de Investigación
Source: Royal Society of Chemistry journal article supplement (doi:10.1039/d4cc00944d), 2006-01-01
Supplement: d4cc00944d1.pdf [file d4cc00944d1.pdf]

Electronic supplementary information

# **Iridium-Catalyzed Asymmetric Cascade Dearomative Allylation/Acyl Transfer Rearrangement: Access to Chiral N-Substituted 2-Pyridones**

Wei-Yi Wang,<sup>†</sup> Zhi-Yuan Yi,<sup>†</sup> Zuo-Fei Wang,<sup>†</sup> Xiu-Qin Dong,<sup>\*†</sup> Chun-Jiang Wang<sup>\*†‡</sup>

<sup>†</sup>College of Chemistry and Molecular Sciences, Wuhan University, Wuhan 430072, China; <sup>‡</sup>State Key Laboratory of Organometallic Chemistry, Shanghai Institute of Organic Chemistry, Shanghai, 230021, China

E-mail: xiuqindong@whu.edu.cn (X.-Q.D.); cjwang@whu.edu.cn (C.-J.W.)

## **Table of Contents**

|                                                                |     |
|----------------------------------------------------------------|-----|
| 1. General remarks .....                                       | S2  |
| 2. Preparation of aryl 2- pyridyl esters.....                  | S2  |
| 3. General procedure for Chiral N-Substituted 2-Pyridones..... | S4  |
| 4. Spectral characterization data for the products .....       | S5  |
| 5. Control experiments and mechanistic investigations.....     | S22 |
| 6. Synthetic transformation .....                              | S24 |
| 7. Reference .....                                             | S30 |
| 8. NMR spectra .....                                           | S31 |

## 1. General remarks

$^1\text{H}$  NMR spectra were recorded on a Bruker 400 MHz spectrometer in  $\text{CDCl}_3$ . Chemical shifts are reported in ppm with the internal TMS signal at 0.0 ppm as a standard. The data are reported as (s = single, d = double, t = triple, q = quarte, m = multiple or unresolved, br s = broad single, coupling constant(s) in Hz, integration).  $^{13}\text{C}$  NMR spectra were recorded on a Bruker 101 MHz spectrometer in  $\text{CDCl}_3$ . Chemical shifts are reported in ppm with the internal chloroform signal at 77.0 ppm as a standard.  $^{19}\text{F}$  NMR spectra were recorded on a Bruker 376 MHz spectrometer in  $\text{CDCl}_3$ . Chemical shifts are reported in ppm with the internal  $\text{CF}_3\text{COOH}$  signal at -76.55 ppm. High resolution mass spectra (HR-MS) were recorded on a LTQ-Orbitrap Elite mass spectrometer with  $\text{CH}_3\text{CN}/\text{MeOH}$  as solvent mixture for the measurements. Commercially obtained reagents were used without further purification. Solvents were purified prior to use according to the standard methods. Unless otherwise noted, all reactions were carried out under nitrogen atmosphere. Enantiomeric excess was determined by chiral-phase HPLC analysis in comparison with authentic racemic materials. Optical rotations were measured on a Rudolph Research Analytical Autopol VI polarimeter with  $[\alpha]_{\text{D}}$  values reported in degrees; concentration ( $c$ ) is in g/100 mL. Chiral ligands,<sup>4,5</sup>  $\text{dbcot}$ ,<sup>6</sup> and  $[\text{Ir}^*]\text{-1-4}$  complexes<sup>7,8</sup> were prepared according to the literature procedure. The absolute configuration of product **7** was determined by comparison of optical rotation data with the literature,<sup>9</sup> the absolute configurations of others were assigned by analogy.

## 2. Preparation of aryl 2- pyridyl esters<sup>1,2</sup>

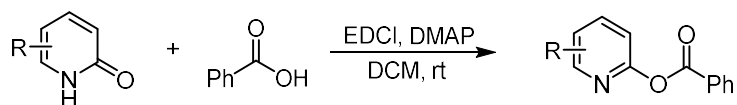

To a round-bottomed flask with the carboxylic acid (1.0 equiv., 10 mmol) were added pyridine 2-ol (1.0 equiv., 10 mmol), DMAP (0.2 equiv.), EDC·HCl (1.3 equiv.) and DCM (10 mL), The reaction mixture was monitored by TLC. When the starting material was consumed, the reaction was quenched with sat. aq.  $\text{NaHCO}_3$  and extracted three times with DCM. The combined organic layer was washed with brine, dried over  $\text{Na}_2\text{SO}_4$ , and then filtered. The filtrate was concentrated in vacuo and the residue was purified by column chromatography to afford the corresponding aryl 2-pyridyl esters.

The characterization data of new compounds are given as following:

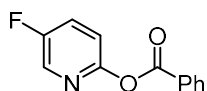

**5-fluoropyridin-2-yl benzoate (1b):** yield (92%); colorless oil.

**<sup>1</sup>H NMR** (400 MHz, Chloroform-*d*)  $\delta$  8.28 – 8.25 (m, 1H), 8.22 – 8.18 (m, 2H), 7.65 – 7.60 (m, 1H), 7.56 – 7.46 (m, 3H), 7.22 – 7.16 (m, 1H).

**<sup>13</sup>C NMR** (101 MHz, Chloroform-*d*)  $\delta$  164.6, 157.9 (d,  $J = 253.7$  Hz), 153.7 (d,  $J = 2.2$  Hz), 135.9 (d,  $J = 26.4$  Hz), 133.9, 130.2, 128.6, 128.5, 126.4 (d,  $J = 21.0$  Hz), 117.4 (d,  $J = 5.1$  Hz).

**<sup>19</sup>F NMR** (376 MHz, Chloroform-*d*)  $\delta$  -130.40 - -130.43 (m).

**HRMS** (ESI+) Calcd. For C<sub>12</sub>H<sub>9</sub>FNO<sub>2</sub><sup>+</sup> ([M+H]<sup>+</sup>): 218.0612, found: 218.0613.

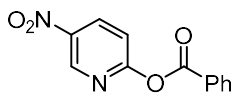

**5-nitropyridin-2-yl benzoate (1c):** yield (35%); white solid; m.p. 122 °C.

**<sup>1</sup>H NMR** (400 MHz, Chloroform-*d*)  $\delta$  9.30 (d,  $J = 2.8$  Hz, 1H), 8.67 – 8.54 (m, 1H), 8.29 – 8.18 (m, 2H), 7.73 – 7.66 (m, 1H), 7.58 – 7.51 (m, 2H), 7.49 – 7.42 (m, 1H).

**<sup>13</sup>C NMR** (101 MHz, Chloroform-*d*)  $\delta$  163.8, 161.7, 145.0, 142.7, 134.9, 134.5, 130.5, 128.8, 128.0, 116.9.

**HRMS** (ESI+) Calcd. For C<sub>12</sub>H<sub>8</sub>N<sub>2</sub>O<sub>4</sub>Na<sup>+</sup> ([M+Na]<sup>+</sup>): 267.0376, found: 267.0377.

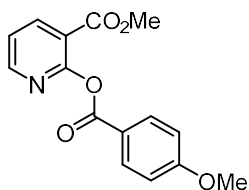

**methyl 2-((4-methoxybenzoyl)oxy) nicotinate (1d):** yield (90%); colorless oil.

**<sup>1</sup>H NMR** (400 MHz, Chloroform-*d*)  $\delta$  8.61 (dd,  $J = 4.7, 1.5$  Hz, 1H), 8.45 (d,  $J = 7.8, 1.4$  Hz, 1H), 8.19 (d,  $J = 8.3$  Hz, 2H), 7.42 – 7.36 (m, 1H), 7.00 (d,  $J = 8.4$  Hz, 2H), 3.89 (s, 3H), 3.77 (s, 3H).

**<sup>13</sup>C NMR** (101 MHz, Chloroform-*d*)  $\delta$  164.5, 164.0, 163.9, 157.1, 152.2, 141.7, 132.5, 122.2, 121.2, 119.3, 113.8, 55.4, 52.5.

**HRMS** (ESI+) Calcd. For C<sub>15</sub>H<sub>13</sub>NO<sub>5</sub>Na<sup>+</sup> ([M+Na]<sup>+</sup>): 310.0686, found: 310.0684.

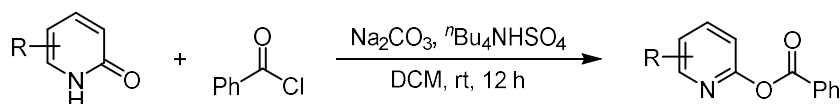

To a solution of pyridine 2-ol (4 mmol, 1.0 equiv.) in CH<sub>2</sub>Cl<sub>2</sub> (10 mL) was added <sup>t</sup>Bu<sub>4</sub>NHSO<sub>4</sub> (0.04 mmol, 1.0 mol %) and Na<sub>2</sub>CO<sub>3</sub> (10 mmol, 2.5 equiv.), then stirred for 10 min at room temperature. Acid chloride (6 mmol, 1.5 equiv.) was added dropwise, the resulting mixture was stirred for 12 hours at room temperature. The reaction mixture was filtered and extracted with CH<sub>2</sub>Cl<sub>2</sub>, the combined organic layers were washed with brine, dried over Na<sub>2</sub>SO<sub>4</sub> and concentrated under vacuum. The residue was purified by column chromatography to give desired product.

The characterization data of new compounds are given as following:

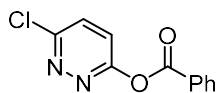

**6-chloropyridazin-3-yl benzoate (1e):** yield (26%); white solid; m.p. 91.5 °C.

<sup>1</sup>H NMR (400 MHz, Chloroform-*d*) δ 8.27 – 8.22 (m, 2H), 7.74 – 7.64 (m, 2H), 7.60 – 7.48 (m, 3H).

<sup>13</sup>C NMR (101 MHz, Chloroform-*d*) δ 164.0, 161.1, 155.3, 134.7, 131.2, 130.7, 128.9, 127.8, 124.4.

HRMS (ESI+) Calcd. For C<sub>11</sub>H<sub>7</sub>ClN<sub>2</sub>O<sub>2</sub>Na<sup>+</sup> ([M+Na]<sup>+</sup>): 257.0088, found: 257.0088.

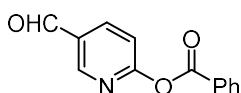

**5-formylpyridin-2-yl benzoate (1f):** yield (79%); white solid; m.p. 72 °C.

<sup>1</sup>H NMR (400 MHz, Chloroform-*d*) δ 10.14 (s, 1H), 8.95 (d, *J* = 2.4 Hz, 1H), 8.35 (dd, *J* = 8.4, 2.4 Hz, 1H), 8.27 – 8.22 (m, 2H), 7.73 – 7.65 (m, 1H), 7.58 – 7.50 (m, 2H), 7.42 (d, *J* = 8.4 Hz, 1H).

<sup>13</sup>C NMR (101 MHz, Chloroform-*d*) δ 189.2, 164.1, 161.9, 152.0, 139.3, 134.3, 130.5, 130.3, 128.7, 128.4, 117.2.

HRMS (ESI+) Calcd. For C<sub>13</sub>H<sub>9</sub>NO<sub>3</sub>Na<sup>+</sup> ([M+Na]<sup>+</sup>): 250.0475, found: 250.0477.

### 3. General procedure for chiral N-substituted 2-pyridones<sup>[3]</sup>

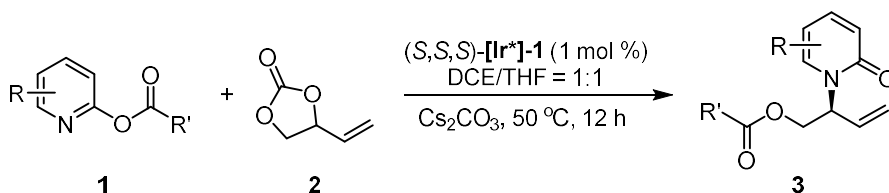

A flame dried Schlenk tube was cooled to rt and evacuated and backfilled with argon for three times. To this Schlenk tube were added  $(S,S,S)$ -[Ir\*]-**1** (0.002 mmol, 1 mol%), pyridin-2-yl benzoates **1** (0.20 mmol, 1.0 equiv.), VEC **2** (0.60 mmol, 3.0 equiv.),  $\text{Cs}_2\text{CO}_3$  (0.2 mmol, 1.0 equiv.) and DCM:THF = 1:1 (2 mL). The reaction was stirred at 50 °C for 12 hours. Once starting material was consumed (monitored by TLC), the solvent was evaporated under reduced pressure and the residue was purified by column chromatography to give the desired product, which was then directly analyzed by HPLC to determine the enantiomeric excess.

#### 4. Spectral characterization data for the products

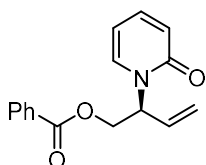

**(S)**-2-(2-oxopyridin-1(2H)-yl)but-3-en-1-yl benzoate (**3a**): yield (80%); colorless oil;  $[\alpha]_{\text{D}}^{15} = -188.1$  ( $c$  0.25,  $\text{CH}_2\text{Cl}_2$ ); The product was analyzed by HPLC to determine the enantiomeric excess: 94% ee (Chiralpak OD-H, *i*-propanol/hexane = 20/80, flow rate 1.0 mL/min,  $\lambda = 230$  nm);  $t_{\text{r}} = 10.20$  and 12.14 min.

$^1\text{H}$  NMR (400 MHz, Chloroform-*d*)  $\delta$  7.95 (dd,  $J = 8.2, 1.4$  Hz, 2H), 7.61 – 7.52 (m, 1H), 7.45 – 7.39 (m, 2H), 7.38 (dd,  $J = 7.0, 2.0$  Hz, 1H), 7.34 – 7.29 (m, 1H), 6.61 (dd,  $J = 9.2, 1.3$  Hz, 1H), 6.23 – 6.18 (m, 1H), 6.11 – 5.99 (m, 2H), 5.50 – 5.35 (m, 2H), 4.75 – 4.63 (m, 2H).

$^{13}\text{C}$  NMR (101 MHz, Chloroform-*d*)  $\delta$  165.9, 162.4, 139.3, 134.8, 133.2, 132.5, 129.5, 129.4, 128.4, 120.8, 120.2, 106.1, 64.0, 55.2.

HRMS (ESI+) Calcd. For  $\text{C}_{16}\text{H}_{16}\text{NO}_3^+$  ( $[\text{M}+\text{H}]^+$ ): 270.1125, found: 270.1125.

**HPLC chromatogram of compound 3a**

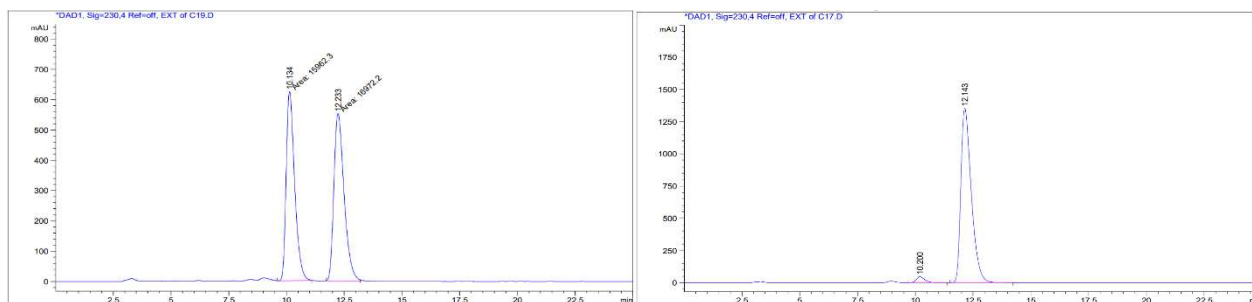

| Peak # | RetTime [min] | Type | Width [min] | Area [mAU*s] | Height [mAU] | Area %  | Peak # | RetTime [min] | Type | Width [min] | Area [mAU*s] | Height [mAU] | Area %  |
|--------|---------------|------|-------------|--------------|--------------|---------|--------|---------------|------|-------------|--------------|--------------|---------|
| 1      | 10.134        | MM   | 0.4261      | 1.59623e4    | 624.41016    | 48.4669 | 1      | 10.200        | BB   | 0.3908      | 1221.76953   | 47.70282     | 2.7920  |
| 2      | 12.233        | MM   | 0.5122      | 1.69722e4    | 552.23590    | 51.5331 | 2      | 12.143        | BB   | 0.4742      | 4.25373e4    | 1355.04028   | 97.2080 |

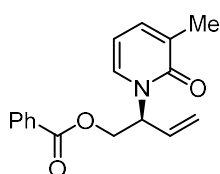

**(S)-2-(3-methyl-2-oxopyridin-1(2H)-yl)but-3-en-1-yl benzoate (3b):** yield (75%); colorless oil;  $[\alpha]_D^{15} = -158.8$  (*c* 0.22, CH<sub>2</sub>Cl<sub>2</sub>); The product was analyzed by HPLC to determine the enantiomeric excess: 95% ee (Chiralpak AD-H, *i*-propanol/hexane = 10/90, flow rate 1.0 mL/min,  $\lambda = 210$  nm);  $t_r = 12.72$  and 14.27 min.

**<sup>1</sup>H NMR** (400 MHz, Chloroform-*d*)  $\delta$  7.98 – 7.92 (m, 2H), 7.59 – 7.51 (m, 1H), 7.45 – 7.38 (m, 2H), 7.29 – 7.22 (m, 1H), 7.18 (d, *J* = 6.6 Hz, 1H), 6.17 – 6.10 (m, 1H), 6.09 – 5.99 (m, 2H), 5.47 – 5.33 (m, 2H), 4.76 – 4.63 (m, 2H), 2.16 (s, 3H).

**<sup>13</sup>C NMR** (101 MHz, Chloroform-*d*)  $\delta$  165.9, 162.7, 136.5, 133.2, 132.8, 132.2, 129.8, 129.6, 129.5, 128.4, 119.9, 105.7, 64.1, 55.6, 17.4.

**HRMS** (ESI+) Calcd. For C<sub>17</sub>H<sub>18</sub>NO<sub>3</sub><sup>+</sup> ([M+H]<sup>+</sup>): 284.1281, found: 284.1281.

### HPLC chromatogram of compound 3b

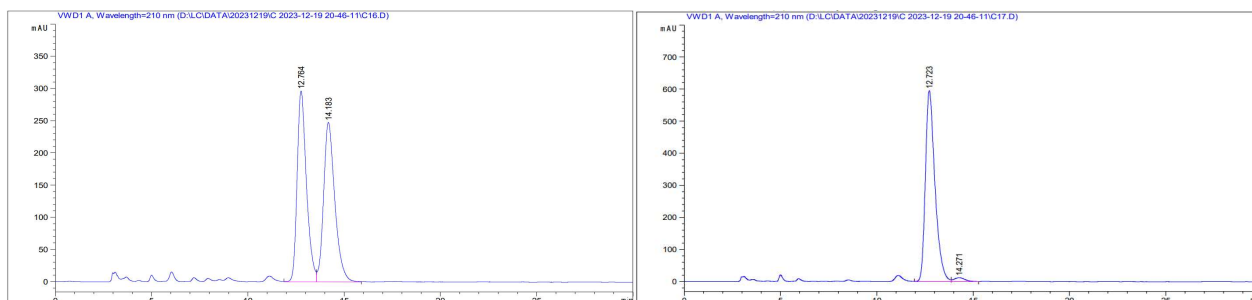

| Peak # | RetTime [min] | Type | Width [min] | Area [mAU*s] | Height [mAU] | Area %  | Peak # | RetTime [min] | Type | Width [min] | Area [mAU*s] | Height [mAU] | Area %  |
|--------|---------------|------|-------------|--------------|--------------|---------|--------|---------------|------|-------------|--------------|--------------|---------|
| 1      | 12.764        | VV   | 0.5070      | 9958.22754   | 296.37408    | 49.7663 | 1      | 12.723        | VV   | 0.5202      | 2.06043e4    | 595.39166    | 97.5652 |
| 2      | 14.183        | VB   | 0.6158      | 1.00517e4    | 247.85780    | 50.2337 | 2      | 14.271        | VV   | 0.5795      | 514.19867    | 12.63891     | 2.4348  |

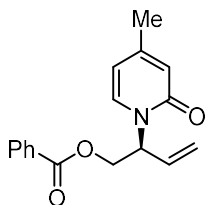

**(S)-2-(4-methyl-2-oxopyridin-1(2H)-yl)but-3-en-1-yl benzoate (3c):** yield (74%); colorless oil;  $[\alpha]_D^{15} = -141.5$  (*c* 0.29, CH<sub>2</sub>Cl<sub>2</sub>); The product was analyzed by HPLC to determine the enantiomeric excess: 94% ee (Chiralpak OD-H, *i*-propanol/hexane = 15/85, flow rate 1.0 mL/min,  $\lambda = 230$  nm);  $t_r = 11.89$  and 13 min.

**<sup>1</sup>H NMR** (400 MHz, Chloroform-*d*)  $\delta$  7.96 (d, *J* = 7.8 Hz, 2H), 7.60 – 7.52 (m, 1H), 7.47 – 7.40 (m, 2H), 7.29 – 7.22 (m, 1H), 6.41 (s, 1H), 6.09 – 5.94 (m, 3H), 5.46 – 5.35 (m, 2H), 4.75 – 4.61 (m, 2H), 2.17 (s, 3H).

**<sup>13</sup>C NMR** (101 MHz, Chloroform-*d*)  $\delta$  165.9, 162.3, 150.9, 133.7, 133.2, 132.7, 129.6, 129.4, 128.4, 119.9, 119.1, 108.7, 64.1, 54.7, 21.1.

**HRMS** (ESI+) Calcd. For C<sub>17</sub>H<sub>18</sub>NO<sub>3</sub><sup>+</sup> ([M+H]<sup>+</sup>): 284.1281, found: 284.1279.

### HPLC chromatogram of compound 3c

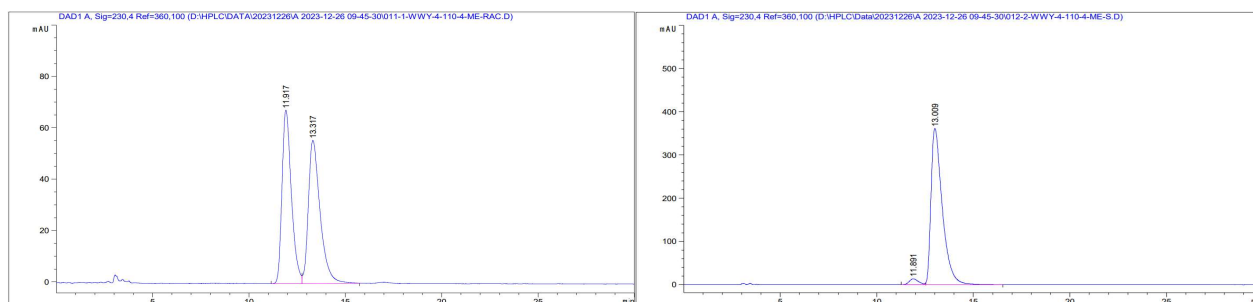

| Peak # | RetTime [min] | Type | Width [min] | Area [mAU*s] | Height [mAU] | Area %  | Peak # | RetTime [min] | Type | Width [min] | Area [mAU*s] | Height [mAU] | Area %  |
|--------|---------------|------|-------------|--------------|--------------|---------|--------|---------------|------|-------------|--------------|--------------|---------|
| 1      | 11.917        | BV   | 0.5125      | 2284.79028   | 67.57712     | 49.1002 | 1      | 11.891        | BV E | 0.4833      | 440.20004    | 13.60984     | 2.9152  |
| 2      | 13.317        | VB   | 0.6222      | 2368.53516   | 55.68481     | 50.8998 | 2      | 13.009        | VB R | 0.6074      | 1.46601e4    | 361.27127    | 97.0848 |

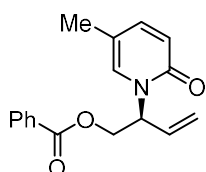

**(S)-2-(5-methyl-2-oxopyridin-1(2H)-yl)but-3-en-1-yl benzoate (3d):** yield (72%); colorless oil;  $[\alpha]_D^{15} = -124.14$  ( $c$  0.25,  $\text{CH}_2\text{Cl}_2$ ); The product was analyzed by HPLC to determine the enantiomeric excess: 98% ee (Chiralpak OD-H, *i*-propanol/hexane = 10/90, flow rate 1.0 mL/min,  $\lambda = 230$  nm);  $t_r = 22.96$  and 24.49 min.

**$^1\text{H}$  NMR** (400 MHz, Chloroform-*d*)  $\delta$  8.02 – 7.93 (m, 2H), 7.61 – 7.52 (m, 1H), 7.47 – 7.38 (m, 2H), 7.17 (dd,  $J = 9.3, 2.5$  Hz, 1H), 7.13 – 7.10 (m, 1H), 6.56 (d,  $J = 9.2$  Hz, 1H), 6.11 – 5.97 (m, 2H), 5.50 – 5.34 (m, 2H), 4.67 (d,  $J = 5.5$  Hz, 2H), 2.05 (s, 3H).

**$^{13}\text{C}$  NMR** (101 MHz, Chloroform-*d*)  $\delta$  165.9, 161.6, 141.9, 133.2, 132.8, 132.0, 129.5, 129.4, 128.4, 120.4, 120.0, 115.0, 64.1, 54.9, 17.2.

**HRMS** (ESI+) Calcd. For  $\text{C}_{17}\text{H}_{18}\text{NO}_3^+$  ( $[\text{M}+\text{H}]^+$ ): 284.1281, found: 284.1281.

### HPLC chromatogram of compound 3d

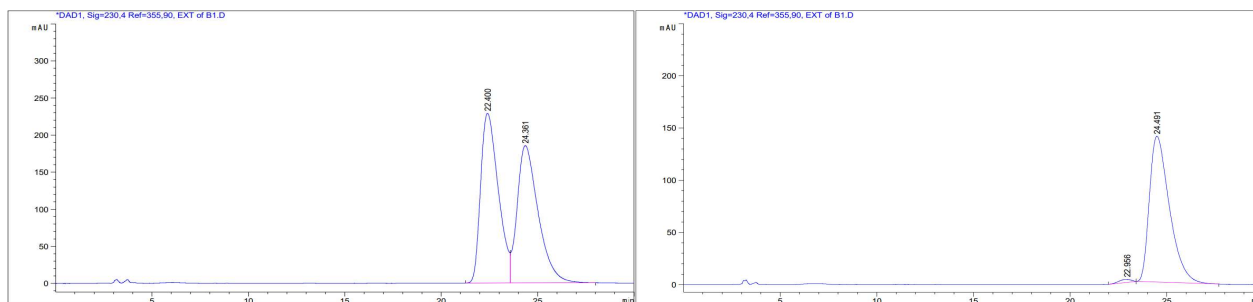

| Peak # | RetTime [min] | Type | Width [min] | Area [mAU*s] | Height [mAU] | Area %  | Peak # | RetTime [min] | Type | Width [min] | Area [mAU*s] | Height [mAU] | Area %  |
|--------|---------------|------|-------------|--------------|--------------|---------|--------|---------------|------|-------------|--------------|--------------|---------|
| 1      | 22.400        | BV   | 0.9553      | 1.45421e4    | 228.87624    | 50.8653 | 1      | 22.956        | BB   | 0.5546      | 125.50831    | 2.72862      | 1.2339  |
| 2      | 24.361        | VB   | 1.1134      | 1.40473e4    | 185.09550    | 49.1347 | 2      | 24.491        | BB   | 1.0804      | 1.00461e4    | 139.80003    | 98.7661 |

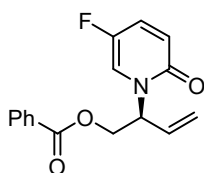

**(S)-2-(5-fluoro-2-oxopyridin-1(2H)-yl)but-3-en-1-yl benzoate (3e):** yield (66%); colorless oil; m.p. 69.8 °C.  $[\alpha]_D^{15} = -209.9$  ( $c$  0.28,  $\text{CH}_2\text{Cl}_2$ ); The product was analyzed by HPLC to determine the enantiomeric excess: 95% ee (Chiralpak OD-H, *i*-propanol/hexane = 20/80, flow rate 1.0 mL/min,  $\lambda = 230$  nm);  $t_r = 12.55$  and 14.22 min.

**$^1\text{H}$  NMR** (400 MHz, Chloroform-*d*)  $\delta$  7.96 (dd,  $J = 8.2, 1.4$  Hz, 2H), 7.62 – 7.52 (m, 1H), 7.48 – 7.40 (m, 2H), 7.35 – 7.23 (m, 2H), 6.59 (dd,  $J = 10.0, 5.4$  Hz, 1H), 6.07 – 5.94 (m, 2H), 5.56 – 5.38 (m, 2H), 4.74 – 4.60 (m, 2H).



$^{13}\text{C}$  NMR (101 MHz, Chloroform-*d*)  $\delta$  165.8, 160.5, 147.2 (d,  $J = 232.0$  Hz), 133.3, 132.0, 131.3 (d,  $J = 24.1$  Hz), 129.5, 129.2, 128.5, 121.4 (d,  $J = 7.2$  Hz), 120.8, 120.1 (d,  $J = 37.5$  Hz), 63.8, 55.4.

$^{19}\text{F}$  NMR (376 MHz, Chloroform-*d*)  $\delta$  -147.45 - -147.49 (m).

HRMS (ESI+) Calcd. For  $\text{C}_{16}\text{H}_{15}\text{FNO}_3^+$  ( $[\text{M}+\text{H}]^+$ ): 288.1030, found: 288.1027.

### HPLC chromatogram of compound 3e

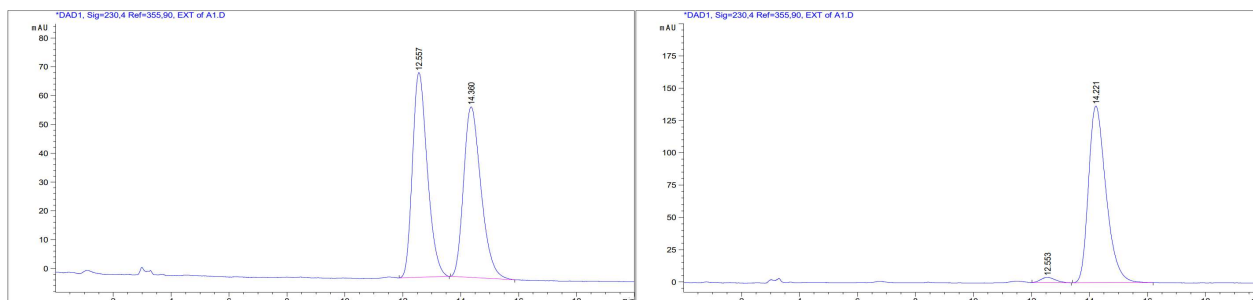

| Peak # | RetTime [min] | Type | Width [min] | Area [mAU*s] | Height [mAU] | Area %  | Peak # | RetTime [min] | Type | Width [min] | Area [mAU*s] | Height [mAU] | Area %  |
|--------|---------------|------|-------------|--------------|--------------|---------|--------|---------------|------|-------------|--------------|--------------|---------|
| 1      | 12.557        | BB   | 0.5479      | 2534.42700   | 71.09342     | 50.5747 | 1      | 12.553        | BB   | 0.4080      | 137.76189    | 3.99837      | 2.3409  |
| 2      | 14.360        | BB   | 0.6377      | 2476.82983   | 59.25523     | 49.4253 | 2      | 14.221        | BB   | 0.6378      | 5747.14697   | 136.89003    | 97.6591 |

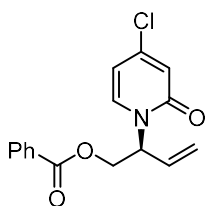

**(S)-2-(4-chloro-2-oxopyridin-1(2H)-yl)but-3-en-1-yl benzoate (3f)**: yield (82%); colorless oil;  $[\alpha]_{\text{D}}^{15} = -102.0$  ( $c$  0.26,  $\text{CH}_2\text{Cl}_2$ ); The product was analyzed by HPLC to determine the enantiomeric excess: 95% ee (Chiralpak IA, *i*-propanol/hexane = 20/80, flow rate 1.0 mL/min,  $\lambda = 210$  nm);  $t_{\text{r}} = 9.62$  and 12.78 min.

$^1\text{H}$  NMR (400 MHz, Chloroform-*d*)  $\delta$  8.00 – 7.89 (m, 2H), 7.63 – 7.52 (m, 1H), 7.47 – 7.41 (m, 2H), 7.33 (d,  $J = 7.4$  Hz, 1H), 6.64 (d,  $J = 2.3$  Hz, 1H), 6.23 (dd,  $J = 7.5, 2.3$  Hz, 1H), 6.08 – 5.90 (m, 2H), 5.57 – 5.36 (m, 2H), 4.74 – 4.60 (m, 2H).

$^{13}\text{C}$  NMR (101 MHz, Chloroform-*d*)  $\delta$  165.8, 161.3, 146.6, 135.2, 133.3, 132.1, 129.5, 129.2, 128.5, 120.6, 119.2, 107.9, 63.8, 55.3.

HRMS (ESI+) Calcd. For  $\text{C}_{16}\text{H}_{15}\text{ClNO}_3^+$  ( $[\text{M}+\text{H}]^+$ ): 304.0735, found: 304.0734.

### HPLC chromatogram of compound 3f

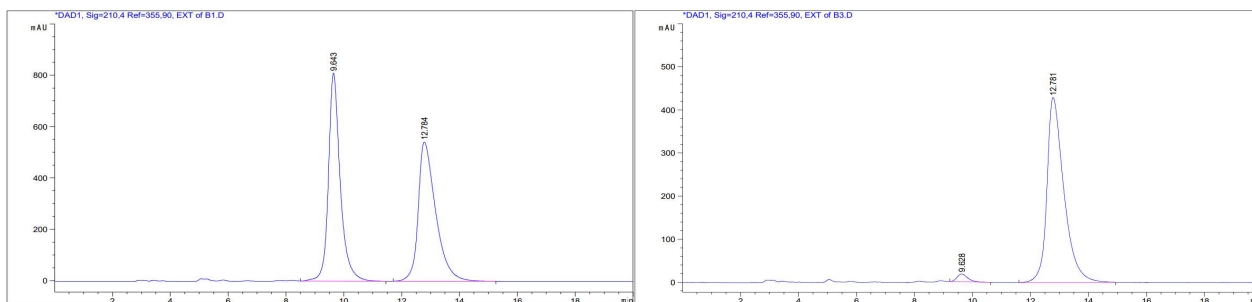

| Peak # | RetTime [min] | Type | Width [min] | Area [mAU*s] | Height [mAU] | Area %  | Peak # | RetTime [min] | Type | Width [min] | Area [mAU*s] | Height [mAU] | Area %  |
|--------|---------------|------|-------------|--------------|--------------|---------|--------|---------------|------|-------------|--------------|--------------|---------|
| 1      | 9.643         | BB   | 0.4172      | 2.29891e4    | 809.75348    | 50.2269 | 1      | 9.628         | BB   | 0.3605      | 463.17865    | 18.22665     | 2.5820  |
| 2      | 12.784        | BB   | 0.6102      | 2.27814e4    | 542.17444    | 49.7731 | 2      | 12.781        | BB   | 0.6033      | 1.74752e4    | 428.95956    | 97.4180 |

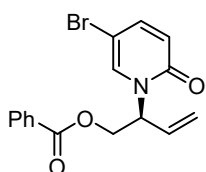

**(S)-2-(5-bromo-2-oxopyridin-1(2H)-yl)but-3-en-1-yl benzoate (3g):** yield (75%); colorless oil;  $[\alpha]_D^{15} = -83.1$  ( $c$  0.41,  $\text{CH}_2\text{Cl}_2$ ); The product was analyzed by HPLC to determine the enantiomeric excess: 95% ee (Chiralpak OD-H,  $i$ -propanol/hexane = 20/80, flow rate 1.0 mL/min,  $\lambda = 230$  nm);  $t_r = 21.58$  and 24.01 min.

**$^1\text{H}$  NMR** (400 MHz, Chloroform- $d$ )  $\delta$  8.00 – 7.92 (m, 2H), 7.61 – 7.54 (m, 1H), 7.51 (d,  $J = 2.7$  Hz, 1H), 7.44 (dd,  $J = 8.5, 7.1$  Hz, 2H), 7.34 (dd,  $J = 9.7, 2.7$  Hz, 1H), 6.53 (d,  $J = 9.7$  Hz, 1H), 6.16 – 5.87 (m, 2H), 5.61 – 5.37 (m, 2H), 4.80 – 4.37 (m, 2H).

**$^{13}\text{C}$  NMR** (101 MHz, Chloroform- $d$ )  $\delta$  165.8, 160.7, 142.4, 135.1, 133.3, 132.0, 129.6, 129.2, 128.5, 122.0, 121.0, 98.0, 63.7, 55.5.

**HRMS** (ESI+) Calcd. For  $\text{C}_{16}\text{H}_{15}\text{BrNO}_3^+$  ( $[\text{M}+\text{H}]^+$ ): 348.0230, found: 348.0229.

### HPLC chromatogram of compound 3g

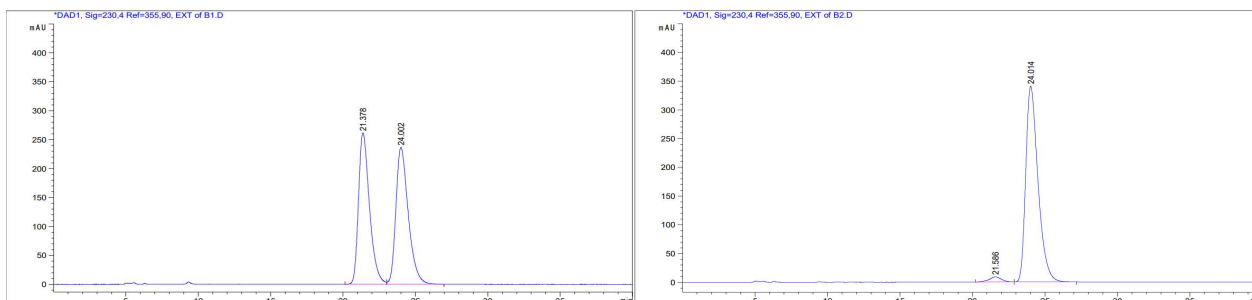

| Peak # | RetTime [min] | Type | Width [min] | Area [mAU*s] | Height [mAU] | Area %  | Peak # | RetTime [min] | Type | Width [min] | Area [mAU*s] | Height [mAU] | Area %  |
|--------|---------------|------|-------------|--------------|--------------|---------|--------|---------------|------|-------------|--------------|--------------|---------|
| 1      | 21.378        | BV   | 0.8063      | 1.38235e4    | 261.68234    | 49.5396 | 1      | 21.586        | BB   | 0.6987      | 535.37653    | 9.01685      | 2.6042  |
| 2      | 24.002        | VB   | 0.9014      | 1.40804e4    | 236.21667    | 50.4604 | 2      | 24.014        | BB   | 0.8898      | 2.00228e4    | 340.64465    | 97.3958 |

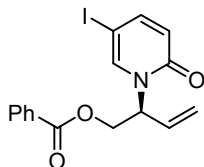

**(S)-2-(5-iodo-2-oxopyridin-1(2H)-yl)but-3-en-1-yl benzoate (3h):** yield (80%); yellow oil;  $[\alpha]_D^{15} = -58.7$  (*c* 0.25, CH<sub>2</sub>Cl<sub>2</sub>); The product was analyzed by HPLC to determine the enantiomeric excess: 93% ee (Chiralpak OD-H, i-propanol/hexane = 15/85, flow rate 0.8 mL/min,  $\lambda = 232$  nm);  $t_r = 21.6$  and 23.93 min.

**<sup>1</sup>H NMR** (400 MHz, Chloroform-*d*)  $\delta$  8.00 – 7.93 (m, 2H), 7.65 – 7.54 (m, 2H), 7.49 – 7.38 (m, 3H), 6.43 (d, *J* = 9.5 Hz, 1H), 6.07 – 5.97 (m, 1H), 5.96 – 5.89 (m, 1H), 5.55 – 5.40 (m, 2H), 4.74 – 4.68 (m, 1H), 4.66 – 4.58 (m, 1H).

**<sup>13</sup>C NMR** (101 MHz, Chloroform-*d*)  $\delta$  165.8, 160.7, 146.7, 140.3, 133.3, 132.1, 129.6, 129.2, 128.5, 122.6, 121.0, 64.3, 63.7, 55.4.

**HRMS** (ESI+) Calcd. For C<sub>16</sub>H<sub>15</sub>INO<sub>3</sub><sup>+</sup> ([M+H]<sup>+</sup>): 396.0091, found: 396.0089.

### HPLC chromatogram of compound 3h

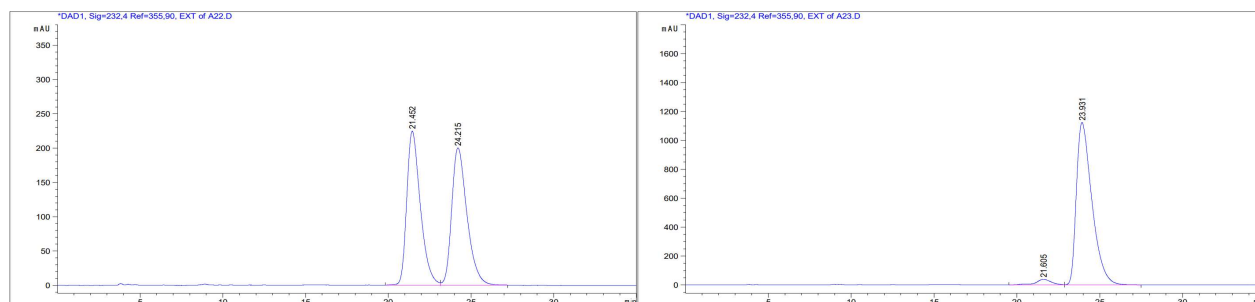

| Peak # | RetTime [min] | Type | Width [min] | Area [mAU*s] | Height [mAU] | Area %  | Peak # | RetTime [min] | Type | Width [min] | Area [mAU*s] | Height [mAU] | Area %  |
|--------|---------------|------|-------------|--------------|--------------|---------|--------|---------------|------|-------------|--------------|--------------|---------|
| 1      | 21.452        | BV   | 0.8559      | 1.28093e4    | 224.40665    | 49.9704 | 1      | 21.605        | BV   | 0.8854      | 2567.93188   | 38.34113     | 3.3941  |
| 2      | 24.215        | VB   | 0.9577      | 1.28245e4    | 200.11703    | 50.0296 | 2      | 23.931        | VB   | 0.9777      | 7.30901e4    | 1122.39563   | 96.6059 |

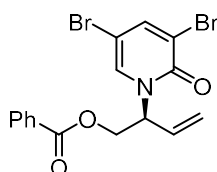

**(S)-2-(3,5-dibromo-2-oxopyridin-1(2H)-yl)but-3-en-1-yl benzoate (3i):** yield (72%); colorless oil;  $[\alpha]^{15}_D = -107.0$  (*c* 0.23, CH<sub>2</sub>Cl<sub>2</sub>); The product was analyzed by HPLC to determine the enantiomeric excess: 94% ee (Chiralpak OD-H, i-propanol/hexane = 20/80, flow rate 0.6 mL/min,  $\lambda = 222$  nm);  $t_r = 20.93$  and 22.65 min.

**<sup>1</sup>H NMR** (400 MHz, Chloroform-*d*)  $\delta$  8.00 – 7.89 (m, 2H), 7.79 (d, *J* = 2.5 Hz, 1H), 7.62 – 7.55 (m, 1H), 7.53 (d, *J* = 2.6 Hz, 1H), 7.45 (dd, *J* = 8.4, 7.1 Hz, 2H), 6.11 – 5.87 (m, 2H), 5.67 – 5.32 (m, 2H), 4.78 – 4.49 (m, 2H).

**<sup>13</sup>C NMR** (101 MHz, Chloroform-*d*)  $\delta$  165.7, 157.5, 143.7, 134.6, 133.4, 131.5, 129.6, 129.1, 128.5, 121.6, 117.5, 96.9, 63.5, 57.6.

**HRMS** (ESI+) Calcd. For C<sub>16</sub>H<sub>14</sub>Br<sub>2</sub>NO<sub>3</sub><sup>+</sup> ([M+Na]<sup>+</sup>): 447.9154, found: 447.9153.

### HPLC chromatogram of compound 3i

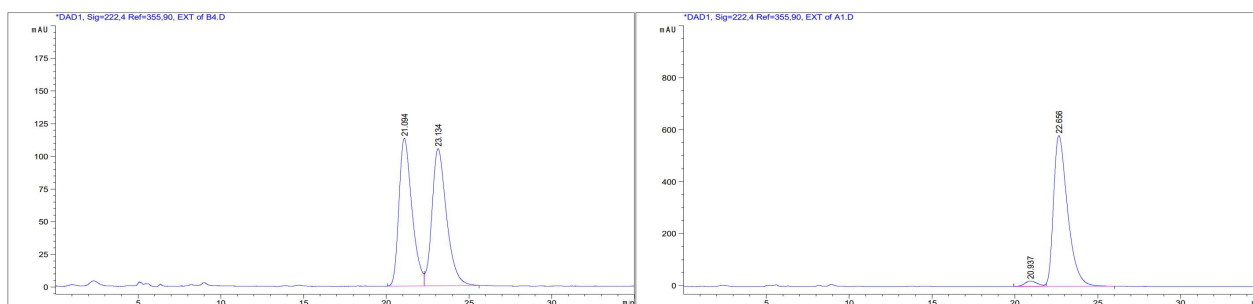

| Peak # | RetTime [min] | Type | Width [min] | Area [mAU*s] | Height [mAU] | Area %  | Peak # | RetTime [min] | Type | Width [min] | Area [mAU*s] | Height [mAU] | Area %  |
|--------|---------------|------|-------------|--------------|--------------|---------|--------|---------------|------|-------------|--------------|--------------|---------|
| 1      | 21.094        | BV   | 0.8080      | 6158.46143   | 112.96193    | 48.9654 | 1      | 20.937        | BV E | 0.7111      | 1048.80835   | 20.42382     | 2.9740  |
| 2      | 23.134        | VB   | 0.8728      | 6418.71582   | 104.76714    | 51.0346 | 2      | 22.656        | VB R | 0.8965      | 3.42173e4    | 579.80096    | 97.0260 |

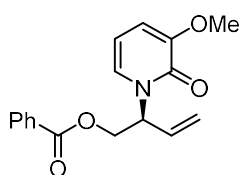

**(S)-2-(3-methoxy-2-oxopyridin-1(2H)-yl)but-3-en-1-yl benzoate (3j):** yield (76%); colorless oil;  $[\alpha]^{15}_D = -84.9$  (*c* 0.25, CH<sub>2</sub>Cl<sub>2</sub>); The product was analyzed by HPLC to determine the enantiomeric excess: 97% ee (Chiralpak OD-H, i-propanol/hexane = 20/80, flow rate 1.0 mL/min,  $\lambda = 230$  nm);  $t_r = 15.17$  and 18.26 min.

**<sup>1</sup>H NMR** (400 MHz, Chloroform-*d*)  $\delta$  7.98 – 7.93 (m, 2H), 7.58 – 7.52 (m, 1H), 7.45 – 7.39 (m, 2H), 7.03 – 6.97 (m, 1H), 6.63 – 6.56 (m, 1H), 6.17 – 6.11 (m, 1H), 6.11 – 6.00 (m, 2H), 5.46 – 5.33 (m, 2H), 4.78 – 4.62 (m, 2H), 3.82 (s, 3H).

$^{13}\text{C}$  NMR (101 MHz, Chloroform-*d*)  $\delta$  166.0, 158.0, 149.9, 133.2, 132.6, 129.6, 129.4, 128.4, 125.5, 120.0, 111.8, 104.9, 64.1, 55.8, 55.5.

HRMS (ESI+) Calcd. For  $\text{C}_{17}\text{H}_{18}\text{NO}_4^+$  ( $[\text{M}+\text{H}]^+$ ): 300.1230, found: 300.1229.

### HPLC chromatogram of compound 3j

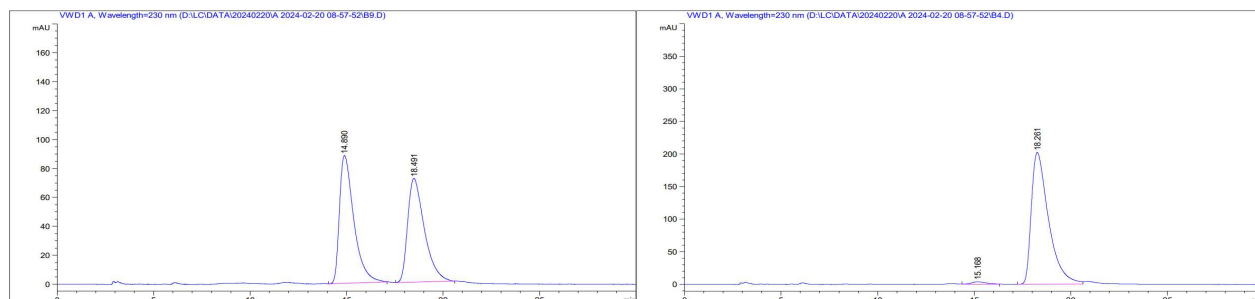

| Peak # | RetTime [min] | Type | Width [min] | Area [mAU*s] | Height [mAU] | Area %  | Peak # | RetTime [min] | Type | Width [min] | Area [mAU*s] | Height [mAU] | Area %  |
|--------|---------------|------|-------------|--------------|--------------|---------|--------|---------------|------|-------------|--------------|--------------|---------|
| 1      | 14.890        | VB   | 0.7743      | 4568.55029   | 88.25942     | 51.3922 | 1      | 15.168        | VV   | 0.6387      | 203.11038    | 3.83255      | 1.5991  |
| 2      | 18.491        | BB   | 0.8788      | 4321.03467   | 71.74884     | 48.6078 | 2      | 18.261        | VB   | 0.9233      | 1.24984e4    | 202.25999    | 98.4009 |

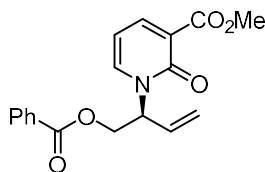

**methyl (S)-1-(1-(benzyloxy)but-3-en-2-yl)-2-oxo-1,2-dihydropyridine-3-carboxylate (3k):**

yield (60%); colorless oil;  $[\alpha]_D^{15} = -103.0$  (*c* 0.21,  $\text{CH}_2\text{Cl}_2$ ); The product was analyzed by HPLC to determine the enantiomeric excess: > 99% ee (Chiralpak IA, i-propanol/hexane = 30/70, flow rate 1.0 mL/min,  $\lambda = 230$  nm);  $t_r = 15.13, 19.01$  min.

$^1\text{H}$  NMR (400 MHz, Chloroform-*d*)  $\delta$  8.16 (dd,  $J = 7.2, 2.2$  Hz, 1H), 7.97 – 7.92 (m, 2H), 7.63 (dd,  $J = 6.8, 2.2$  Hz, 1H), 7.59 – 7.54 (m, 1H), 7.47 – 7.39 (m, 2H), 6.33 – 6.23 (m, 1H), 6.14 – 5.96 (m, 2H), 5.56 – 5.37 (m, 2H), 4.86 – 4.61 (m, 2H), 3.91 (s, 3H).

$^{13}\text{C}$  NMR (101 MHz, Chloroform-*d*)  $\delta$  165.8, 165.7, 159.1, 144.8, 140.2, 133.3, 132.2, 129.6, 129.2, 128.5, 120.9, 120.8, 104.8, 63.6, 56.4, 52.4.

HRMS (ESI+) Calcd. For  $\text{C}_{18}\text{H}_{18}\text{NO}_5^+$  ( $[\text{M}+\text{H}]^+$ ): 328.1179, found: 328.1181.

### HPLC chromatogram of compound 3k

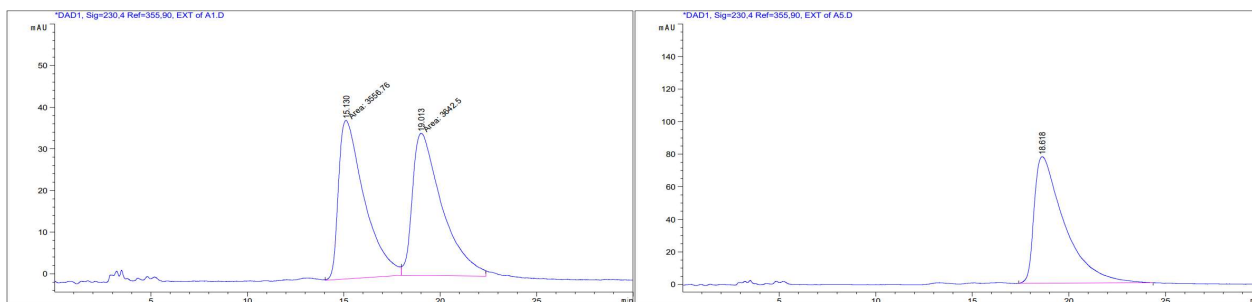

| Peak # | RetTime [min] | Type | Width [min] | Area [mAU*s] | Height [mAU] | Area %  | Peak # | RetTime [min] | Type | Width [min] | Area [mAU*s] | Height [mAU] | Area %   |
|--------|---------------|------|-------------|--------------|--------------|---------|--------|---------------|------|-------------|--------------|--------------|----------|
| 1      | 15.130        | MM   | 1.5565      | 3556.75879   | 38.08603     | 49.4045 | 1      | 18.618        | BB   | 1.4341      | 8446.05957   | 77.70387     | 100.0000 |
| 2      | 19.013        | MM   | 1.7784      | 3642.50146   | 34.13724     | 50.5955 |        |               |      |             |              |              |          |

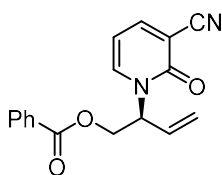

**(S)-2-(3-cyano-2-oxopyridin-1(2H)-yl)but-3-en-1-yl benzoate (31):** yield (90%); colorless oil;  $[\alpha]_D^{15} = -255.4$  ( $c$  0.30,  $\text{CH}_2\text{Cl}_2$ ); The product was analyzed by HPLC to determine the enantiomeric excess: 94% ee (Chiralpak AD-H,  $i$ -propanol/hexane = 10/90, flow rate 0.8 mL/min,  $\lambda = 210$  nm);  $t_r = 56.57$  and 62.20 min.

**$^1\text{H}$  NMR** (400 MHz, Chloroform- $d$ )  $\delta$  7.92 (dd,  $J = 8.1, 1.5$  Hz, 2H), 7.81 (dd,  $J = 7.1, 2.1$  Hz, 1H), 7.70 (dd,  $J = 6.9, 2.1$  Hz, 1H), 7.60 – 7.54 (m, 1H), 7.47 – 7.40 (m, 2H), 6.37 – 6.31 (m, 1H), 6.13 – 6.01 (m, 1H), 5.98 – 5.91 (m, 1H), 5.59 – 5.42 (m, 2H), 4.82 – 4.66 (m, 2H).

**$^{13}\text{C}$  NMR** (101 MHz, Chloroform- $d$ )  $\delta$  165.7, 159.4, 147.0, 140.5, 133.4, 131.2, 129.4, 129.0, 128.5, 121.6, 115.4, 105.54, 105.45, 63.3, 56.9.

**HRMS** (ESI+) Calcd. For  $\text{C}_{17}\text{H}_{15}\text{N}_2\text{O}_3^+$  ( $[\text{M}+\text{H}]^+$ ): 295.1077, found: 295.1078.

### HPLC chromatogram of compound 31

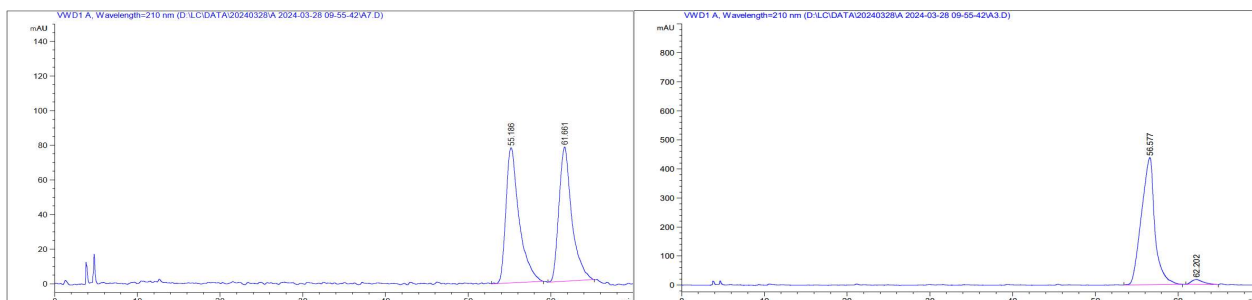



| Peak # | RetTime [min] | Type | Width [min] | Area [mAU*s] | Height [mAU] | Area %  | Peak # | RetTime [min] | Type | Width [min] | Area [mAU*s] | Height [mAU] | Area %  |
|--------|---------------|------|-------------|--------------|--------------|---------|--------|---------------|------|-------------|--------------|--------------|---------|
| 1      | 55.186        | VB R | 1.5071      | 8655.49902   | 78.00778     | 50.7385 | 1      | 56.577        | VB R | 1.5477      | 4.92125e4    | 437.67819    | 96.7731 |
| 2      | 61.661        | BV R | 1.3637      | 8403.52832   | 77.61050     | 49.2615 | 2      | 62.202        | BB   | 1.1698      | 1641.00391   | 16.65577     | 3.2269  |

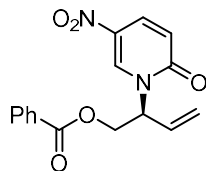

**(S)-2-(5-nitro-2-oxopyridin-1(2H)-yl)but-3-en-1-yl benzoate 3m:** yield (80%); colorless oil;  $[\alpha]_D^{15} = -41.5$  ( $c$  0.28,  $\text{CH}_2\text{Cl}_2$ ); The product was analyzed by HPLC to determine the enantiomeric excess: 95% ee (Chiralpak IA,  $i$ -propanol/hexane = 15/85, flow rate 1.0 mL/min,  $\lambda = 304$  nm);  $t_r = 17.03$  and 19.67 min.

**$^1\text{H}$  NMR** (400 MHz, Chloroform- $d$ )  $\delta$  8.78 (d,  $J = 3.0$  Hz, 1H), 8.08 (dd,  $J = 10.1, 3.1$  Hz, 1H), 7.98 – 7.91 (m, 2H), 7.63 – 7.54 (m, 1H), 7.49 – 7.41 (m, 2H), 6.60 (d,  $J = 10.0$  Hz, 1H), 6.15 – 6.04 (m, 1H), 6.01 – 5.93 (m, 1H), 5.68 – 5.50 (m, 2H), 4.79 (dd,  $J = 12.1, 5.4$  Hz, 1H), 4.66 (dd,  $J = 12.1, 4.0$  Hz, 1H).

**$^{13}\text{C}$  NMR** (101 MHz, Chloroform- $d$ )  $\delta$  165.7, 161.0, 137.6, 133.6, 133.0, 131.0, 130.8, 129.5, 128.8, 128.6, 122.4, 119.5, 63.5, 56.5.

**HRMS** (ESI+) Calcd. For  $\text{C}_{16}\text{H}_{15}\text{N}_2\text{O}_5^+$  ( $[\text{M}+\text{H}]^+$ ): 315.0975, found: 315.0977.

### HPLC chromatogram of compound 3m

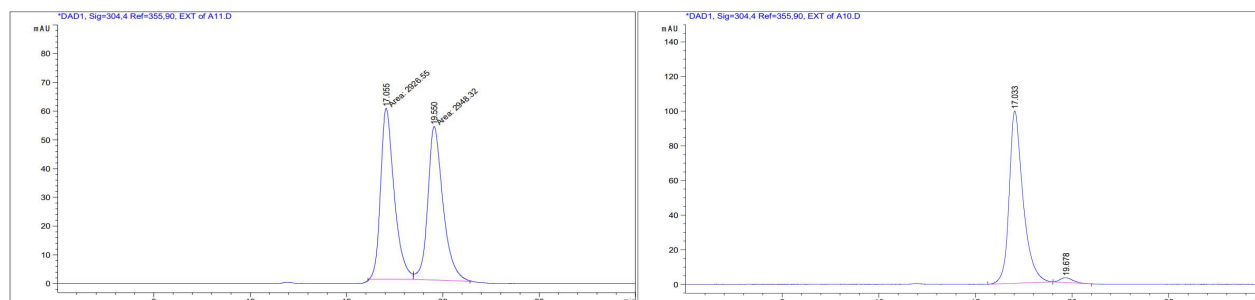

| Peak # | RetTime [min] | Type | Width [min] | Area [mAU*s] | Height [mAU] | Area %  | Peak # | RetTime [min] | Type | Width [min] | Area [mAU*s] | Height [mAU] | Area %  |
|--------|---------------|------|-------------|--------------|--------------|---------|--------|---------------|------|-------------|--------------|--------------|---------|
| 1      | 17.055        | MM   | 0.8205      | 2926.54956   | 59.44670     | 49.8147 | 1      | 17.033        | BB   | 0.7326      | 4969.93701   | 99.52761     | 97.5272 |
| 2      | 19.550        | MM   | 0.9205      | 2948.31812   | 53.38530     | 50.1853 | 2      | 19.678        | BB   | 0.5424      | 126.01509    | 2.77192      | 2.4728  |

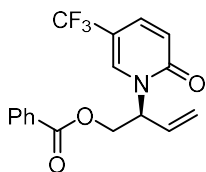

**(S)-2-(2-oxo-5-(trifluoromethyl)pyridin-1(2H)-yl)but-3-en-1-yl benzoate (3n):** yield (78%); colorless oil;  $[\alpha]_D^{15} = -106.7$  ( $c$  0.25,  $\text{CH}_2\text{Cl}_2$ ); The product was analyzed by HPLC to determine the enantiomeric excess: 92% ee (Chiralpak OD-H, i-propanol/hexane = 20/80, flow rate 1.0 mL/min,  $\lambda = 230$  nm);  $t_r = 10.53$  and 11.91 min.

**$^1\text{H}$  NMR** (400 MHz, Chloroform- $d$ )  $\delta$  7.97 – 7.89 (m, 2H), 7.85 – 7.81 (m, 1H), 7.60 – 7.54 (m, 1H), 7.48 – 7.39 (m, 3H), 6.67 (d,  $J = 9.6$  Hz, 1H), 6.11 – 6.00 (m, 1H), 6.00 – 5.94 (m, 1H), 5.60 – 5.45 (m, 2H), 4.81 – 4.73 (m, 1H), 4.68 – 4.59 (m, 1H).

**$^{13}\text{C}$  NMR** (101 MHz, Chloroform- $d$ )  $\delta$  165.7, 161.5, 135.2 (q,  $J = 5.28$  Hz), 134.9 (q,  $J = 2.34$  Hz), 133.4, 131.6, 129.5, 129.1, 128.5, 123.2 (q,  $J = 269.94$  Hz), 121.5, 121.3, 109.6 (q,  $J = 34.96$  Hz), 63.5, 55.9.

**$^{19}\text{F}$  NMR** (376 MHz, Chloroform- $d$ )  $\delta$  -62.47.

**HRMS** (ESI+) Calcd. For  $\text{C}_{17}\text{H}_{15}\text{F}_3\text{NO}_3^+$  ( $[\text{M}+\text{H}]^+$ ): 338.0999, found: 338.1002.

#### HPLC chromatogram of compound 3n

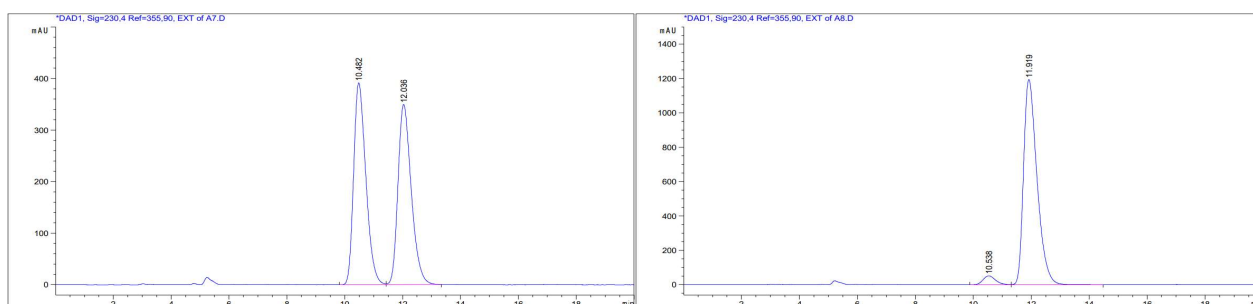

| Peak # | RetTime [min] | Type | Width [min] | Area [mAU*s] | Height [mAU] | Area %  | Peak # | RetTime [min] | Type | Width [min] | Area [mAU*s] | Height [mAU] | Area %  |
|--------|---------------|------|-------------|--------------|--------------|---------|--------|---------------|------|-------------|--------------|--------------|---------|
| 1      | 10.482        | BV   | 0.4594      | 1.14593e4    | 391.65677    | 50.7423 | 1      | 10.538        | BV   | 0.4569      | 1525.67761   | 51.30680     | 3.8233  |
| 2      | 12.036        | VB   | 0.4915      | 1.11240e4    | 349.31699    | 49.2577 | 2      | 11.919        | VB   | 0.4892      | 3.83791e4    | 1193.37195   | 96.1767 |

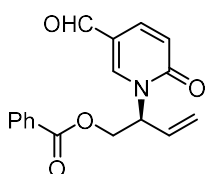

**(S)-2-(5-formyl-2-oxopyridin-1(2H)-yl)but-3-en-1-yl benzoate (3o):** yield (96%); yellow oil;



$[\alpha]^{15}_D = -69.5$  ( $c$  0.43,  $\text{CH}_2\text{Cl}_2$ ); The product was analyzed by HPLC to determine the enantiomeric excess: 93% ee (Chiralpak AD-H, i-propanol/hexane = 20/80, flow rate 0.6 mL/min,  $\lambda = 278$  nm);  $t_r = 41.55$  and 46.29 min.

$^1\text{H NMR}$  (400 MHz, Chloroform- $d$ )  $\delta$  9.58 (s, 1H), 8.04 (d,  $J = 2.5$  Hz, 1H), 7.92 (d,  $J = 7.7$  Hz, 2H), 7.80 (dd,  $J = 9.5, 2.5$  Hz, 1H), 7.61 – 7.53 (m, 1H), 7.48 – 7.37 (m, 2H), 6.64 (d,  $J = 9.4$  Hz, 1H), 6.16 – 6.04 (m, 1H), 6.04 – 5.96 (m, 1H), 5.57 – 5.48 (m, 2H), 4.82 – 4.67 (m, 2H).

$^{13}\text{C NMR}$  (101 MHz, Chloroform- $d$ )  $\delta$  186.0, 165.7, 162.1, 144.5, 135.5, 133.4, 131.5, 129.4, 129.0, 128.5, 121.6, 120.8, 118.3, 63.5, 56.0.

**HRMS** (ESI+) Calcd. For  $\text{C}_{17}\text{H}_{16}\text{NO}_4^+$  ( $[\text{M}+\text{H}]^+$ ): 298.1074, found: 298.1074.

### HPLC chromatogram of compound 3o

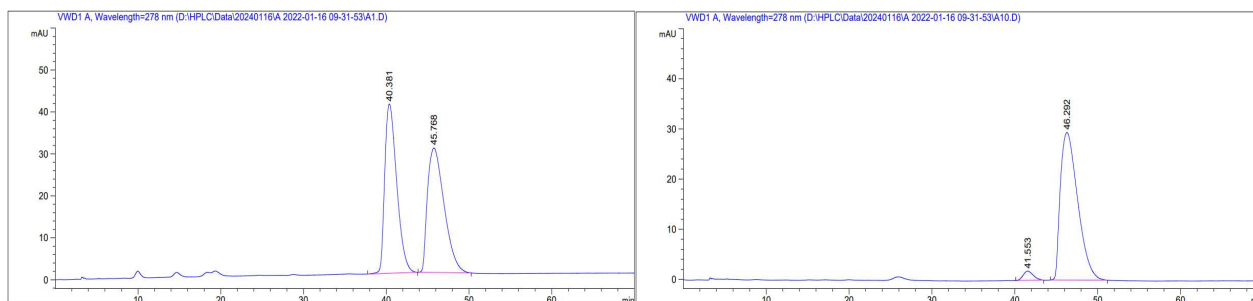

| Peak # | RetTime [min] | Type | Width [min] | Area [mAU*s] | Height [mAU] | Area %  | Peak # | RetTime [min] | Type | Width [min] | Area [mAU*s] | Height [mAU] | Area %  |
|--------|---------------|------|-------------|--------------|--------------|---------|--------|---------------|------|-------------|--------------|--------------|---------|
| 1      | 40.381        | BB   | 1.5056      | 4056.50366   | 40.32428     | 49.4177 | 1      | 41.553        | BB   | 0.9962      | 156.26610    | 1.84678      | 3.5310  |
| 2      | 45.768        | BB   | 2.0327      | 4152.10840   | 29.66945     | 50.5823 | 2      | 46.292        | BB   | 1.8606      | 4269.29834   | 29.41059     | 96.4690 |

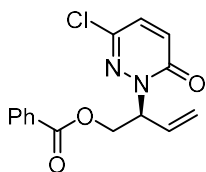

**(S)-2-(3-chloro-6-oxopyridazin-1(6H)-yl)but-3-en-1-yl benzoate (3p)**: yield (40%); colorless oil;  $[\alpha]^{15}_D = -14.7$  ( $c$  0.30,  $\text{CH}_2\text{Cl}_2$ ); The product was analyzed by HPLC to determine the enantiomeric excess: 94% ee (Chiralpak OD-H, i-propanol/hexane = 15/85, flow rate 0.6 mL/min,  $\lambda = 210$  nm);  $t_r = 26.44$  and 29.23 min.

$^1\text{H NMR}$  (400 MHz, Chloroform- $d$ )  $\delta$  7.97 – 7.92 (m, 2H), 7.58 – 7.52 (m, 1H), 7.45 – 7.38 (m, 2H), 7.15 (d,  $J = 9.7$  Hz, 1H), 6.92 (d,  $J = 9.7$  Hz, 1H), 6.12 – 6.01 (m, 1H), 5.99 – 5.92 (m, 1H), 5.49 – 5.38 (m, 2H), 4.73 – 4.55 (m, 2H).

$^{13}\text{C NMR}$  (101 MHz, Chloroform- $d$ )  $\delta$  165.9, 158.8, 137.8, 133.4, 133.1, 131.8, 131.8, 129.6, 129.5,

128.4, 120.9, 64.5, 58.8.

**HRMS** (ESI+) Calcd. For C<sub>15</sub>H<sub>14</sub>ClN<sub>2</sub>O<sub>3</sub><sup>+</sup> ([M+H]<sup>+</sup>): 305.0687, found: 305.0691.

### HPLC chromatogram of compound 3p

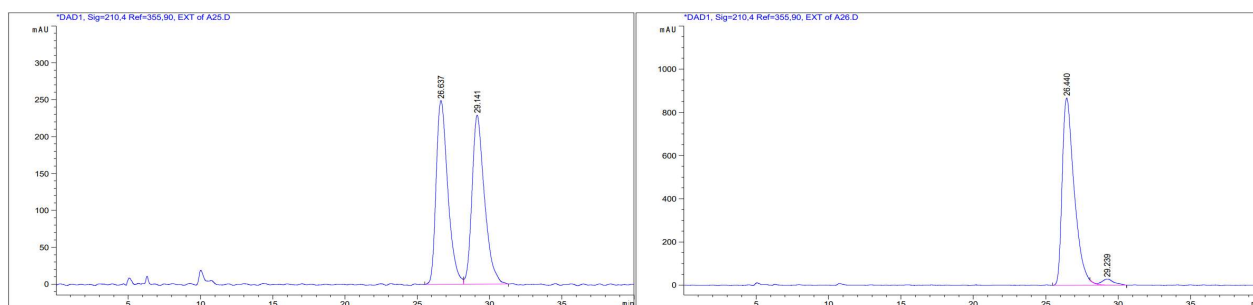

| Peak # | RetTime [min] | Type | Width [min] | Area [mAU*s] | Height [mAU] | Area %  | Peak # | RetTime [min] | Type | Width [min] | Area [mAU*s] | Height [mAU] | Area %  |
|--------|---------------|------|-------------|--------------|--------------|---------|--------|---------------|------|-------------|--------------|--------------|---------|
| 1      | 26.637        | BV   | 0.8109      | 1.39839e4    | 249.09938    | 50.4208 | 1      | 26.440        | BV R | 0.8296      | 5.01589e4    | 866.11938    | 96.8840 |
| 2      | 29.141        | VB   | 0.8480      | 1.37505e4    | 229.17809    | 49.5792 | 2      | 29.239        | VB E | 0.6943      | 1613.21887   | 27.74677     | 3.1160  |

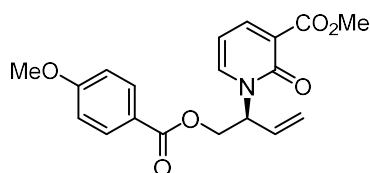

**Methyl (S)-1-(1-((4-methoxybenzoyl)oxy)but-3-en-2-yl)-2-oxo-1,2-dihydropyridine-3-carboxylate (3q):** yield (33%); colorless oil;  $[\alpha]_D^{15} = -51.6$  (*c* 0.51, CH<sub>2</sub>Cl<sub>2</sub>); The product was analyzed by HPLC to determine the enantiomeric excess: 97% ee (Chiralpak IA, i-propanol/hexane = 30/70, flow rate 0.8 mL/min,  $\lambda = 254$  nm);  $t_r = 23.82$  and 28.55 min.

**<sup>1</sup>H NMR** (400 MHz, Chloroform-*d*)  $\delta$  8.16 (dd, *J* = 7.1, 2.2 Hz, 1H), 7.89 (d, *J* = 8.8 Hz, 2H), 7.62 (dd, *J* = 6.8, 2.2 Hz, 1H), 6.90 (d, *J* = 8.8 Hz, 2H), 6.32 – 6.24 (m, 1H), 6.12 – 5.97 (m, 2H), 5.53 – 5.39 (m, 2H), 4.76 – 4.63 (m, 2H), 3.91 (s, 3H), 3.85 (s, 3H).

**<sup>13</sup>C NMR** (101 MHz, Chloroform-*d*)  $\delta$  165.8, 165.6, 163.6, 159.2, 144.8, 140.3, 132.2, 131.7, 121.6, 120.8, 120.7, 113.7, 104.7, 63.3, 56.4, 55.4, 52.4.

**HRMS** (ESI+) Calcd. For C<sub>19</sub>H<sub>19</sub>NO<sub>6</sub>Na<sup>+</sup> ([M+Na]<sup>+</sup>): 380.1105, found: 380.1108.

### HPLC chromatogram of compound 3q

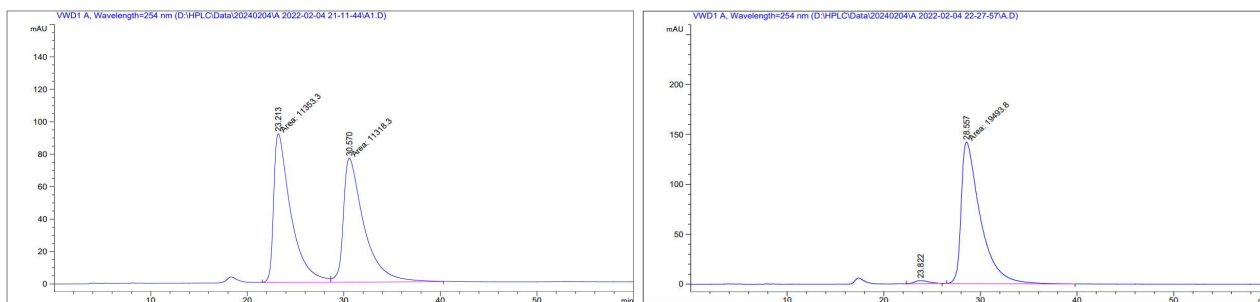

| Peak # | RetTime [min] | Type | Width [min] | Area [mAU*s] | Height [mAU] | Area %  | Peak # | RetTime [min] | Type | Width [min] | Area [mAU*s] | Height [mAU] | Area %  |
|--------|---------------|------|-------------|--------------|--------------|---------|--------|---------------|------|-------------|--------------|--------------|---------|
| 1      | 23.213        | MF   | 2.0641      | 1.13533e4    | 91.67135     | 50.0772 | 1      | 23.822        | BB   | 1.1657      | 290.26810    | 2.93286      | 1.4672  |
| 2      | 30.570        | FM   | 2.4735      | 1.13183e4    | 76.26447     | 49.9228 | 2      | 28.557        | MM   | 2.2920      | 1.94937e4    | 141.75130    | 98.5328 |

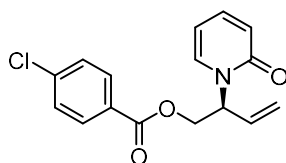

**(S)-2-(2-oxopyridin-1(2H)-yl)but-3-en-1-yl 4-chlorobenzoate (3r):** yield (90%); colorless oil;  $[\alpha]_D^{15} = -131.7$  (*c* 0.24, CH<sub>2</sub>Cl<sub>2</sub>); The product was analyzed by HPLC to determine the enantiomeric excess: 95% ee (Chiralpak OD-H, i-propanol/hexane = 20/80, flow rate 1.0 mL/min,  $\lambda = 230$  nm);  $t_r = 10.43$  and 12.22 min.

**<sup>1</sup>H NMR** (400 MHz, Chloroform-*d*)  $\delta$  7.94 – 7.83 (m, 2H), 7.44 – 7.37 (m, 2H), 7.36 – 7.27 (m, 2H), 6.60 (d, *J* = 9.1 Hz, 1H), 6.24 – 6.17 (m, 1H), 6.10 – 5.97 (m, 2H), 5.49 – 5.38 (m, 2H), 4.69 – 4.67 (m, 2H).

**<sup>13</sup>C NMR** (101 MHz, Chloroform-*d*)  $\delta$  165.1, 162.4, 139.7, 139.3, 134.7, 132.4, 130.9, 128.8, 127.8, 120.9, 120.3, 106.2, 64.2, 55.2.

**HRMS** (ESI+) Calcd. For C<sub>16</sub>H<sub>14</sub>ClNO<sub>3</sub>Na<sup>+</sup> ([M+Na]<sup>+</sup>): 326.0554, found: 326.0555.

### HPLC chromatogram of compound 3r

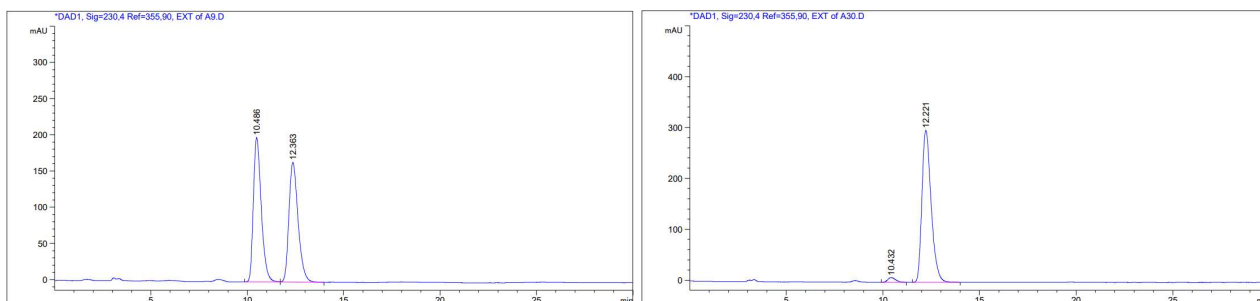

| Peak # | RetTime [min] | Type | Width [min] | Area [mAU*s] | Height [mAU] | Area %  | Peak # | RetTime [min] | Type | Width [min] | Area [mAU*s] | Height [mAU] | Area %  |
|--------|---------------|------|-------------|--------------|--------------|---------|--------|---------------|------|-------------|--------------|--------------|---------|
| 1      | 10.486        | BB   | 0.4367      | 5651.32471   | 199.37723    | 50.9612 | 1      | 10.432        | BB   | 0.4050      | 262.44678    | 9.36241      | 2.5934  |
| 2      | 12.363        | BB   | 0.5020      | 5438.13330   | 165.22981    | 49.0388 | 2      | 12.221        | BB   | 0.5033      | 9857.22852   | 298.50372    | 97.4066 |

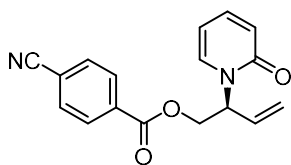

**(S)-2-(2-oxopyridin-1(2H)-yl)but-3-en-1-yl 4-cyanobenzoate (3s):** yield (92%); colorless oil;  $[\alpha]_D^{15} = -92.9$  (*c* 0.34, CH<sub>2</sub>Cl<sub>2</sub>); The product was analyzed by HPLC to determine the enantiomeric excess: 95% ee (Chiralpak OD-H, i-propanol/hexane = 20/80, flow rate 1.0 mL/min,  $\lambda = 230$  nm);  $t_r = 24.54$  and 28.44 min.

**<sup>1</sup>H NMR** (400 MHz, Chloroform-*d*)  $\delta$  8.04 (d, *J* = 8.2 Hz, 2H), 7.79 – 7.68 (m, 2H), 7.37 – 7.29 (m, 2H), 6.64 – 6.55 (m, 1H), 6.26 – 6.15 (m, 1H), 6.11 – 5.98 (m, 2H), 5.54 – 5.34 (m, 2H), 4.80 – 4.63 (m, 2H).

**<sup>13</sup>C NMR** (101 MHz, Chloroform-*d*)  $\delta$  164.3, 162.4, 139.4, 134.5, 133.2, 132.3, 132.3, 130.1, 121.0, 120.5, 117.8, 116.6, 106.3, 64.7, 55.0.

**HRMS** (ESI+) Calcd. For C<sub>17</sub>H<sub>15</sub>N<sub>2</sub>O<sub>3</sub><sup>+</sup> ([M+H]<sup>+</sup>): 295.1077, found: 295.1077.

#### HPLC chromatogram of compound 3s

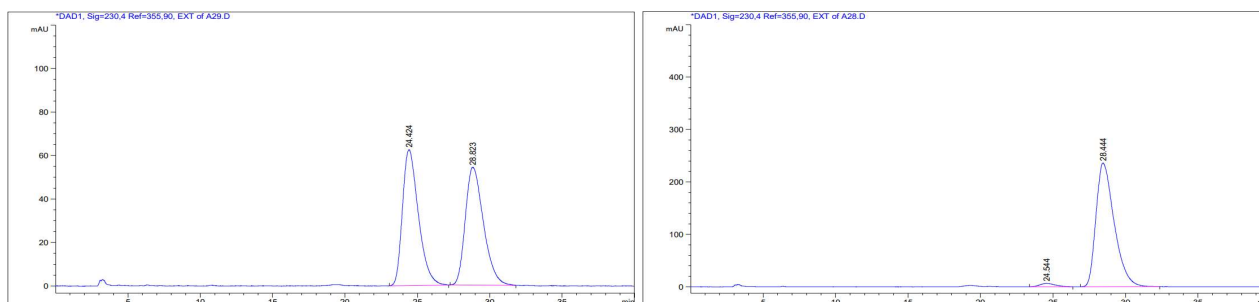

| Peak # | RetTime [min] | Type | Width [min] | Area [mAU*s] | Height [mAU] | Area %  | Peak # | RetTime [min] | Type | Width [min] | Area [mAU*s] | Height [mAU] | Area %  |
|--------|---------------|------|-------------|--------------|--------------|---------|--------|---------------|------|-------------|--------------|--------------|---------|
| 1      | 24.424        | BB   | 1.0029      | 4782.34277   | 62.48832     | 50.3239 | 1      | 24.544        | BB   | 0.8719      | 481.17218    | 6.48311      | 2.2841  |
| 2      | 28.823        | BB   | 1.0455      | 4720.78320   | 54.23744     | 49.6761 | 2      | 28.444        | BB   | 1.2615      | 2.05850e4    | 236.01926    | 97.7159 |

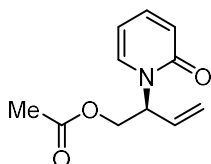

**(S)-2-(2-oxopyridin-1(2H)-yl)but-3-en-1-yl acetate(3t):** yield (60%); colorless oil;  $[\alpha]_D^{15} = -97.5$  (*c* 0.31, CH<sub>2</sub>Cl<sub>2</sub>); The product was analyzed by HPLC to determine the enantiomeric excess: 91% ee (Chiralpak OD-H, i-propanol/hexane = 5/95, flow rate 1.0 mL/min,  $\lambda = 230$  nm);  $t_r = 31.26$  and 32.78 min.

**<sup>1</sup>H NMR** (400 MHz, Chloroform-*d*)  $\delta$  7.28 – 7.20 (m, 2H), 6.52 (d, *J* = 9.1 Hz, 1H), 6.15 – 6.10 (m,

<sup>1</sup>H), 5.95 – 5.84 (m, 1H), 5.83 – 5.77 (m, 1H), 5.35 (dd, *J* = 10.6, 1.7 Hz, 1H), 5.24 (dd, *J* = 17.4, 1.8 Hz, 1H), 4.44 – 4.31 (m, 2H), 1.95 (s, 3H).

<sup>13</sup>C NMR (101 MHz, Chloroform-*d*) δ 170.4, 162.3, 139.2, 134.8, 132.6, 120.8, 119.9, 106.0, 63.5, 55.0, 20.6.

HRMS (ESI+) Calcd. For C<sub>11</sub>H<sub>14</sub>NO<sub>3</sub><sup>+</sup> ([M+H]<sup>+</sup>): 208.0968, found: 208.0969.

### HPLC chromatogram of compound 3t

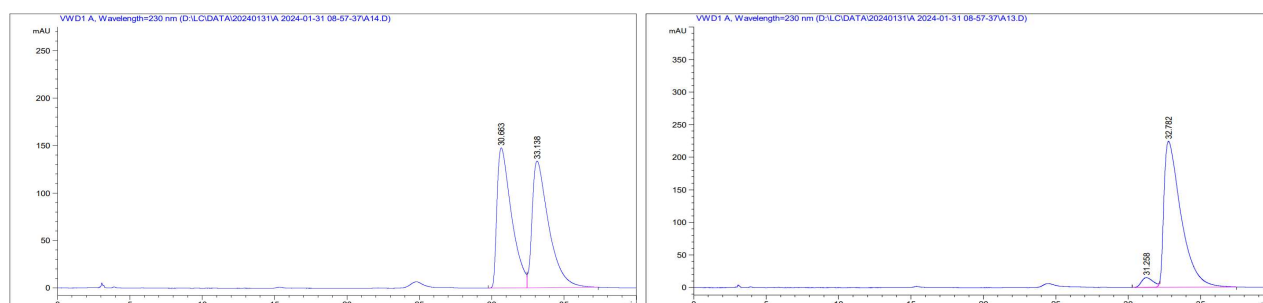

| Peak # | RetTime [min] | Type | Width [min] | Area [mAU*s] | Height [mAU] | Area %  | Peak # | RetTime [min] | Type | Width [min] | Area [mAU*s] | Height [mAU] | Area %  |
|--------|---------------|------|-------------|--------------|--------------|---------|--------|---------------|------|-------------|--------------|--------------|---------|
| 1      | 30.663        | VR   | 1.0193      | 1.02873e4    | 147.70465    | 49.0748 | 1      | 31.258        | BVE  | 0.7475      | 845.57513    | 15.01123     | 4.4014  |
| 2      | 33.138        | VB   | 1.1295      | 1.06752e4    | 133.50294    | 50.9252 | 2      | 32.782        | VB   | 1.1545      | 1.83661e4    | 224.03165    | 95.5986 |

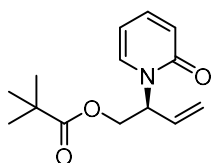

**(S)-2-(2-oxopyridin-1(2H)-yl)but-3-en-1-yl pivalate (3u):** yield (30%); white solid; m.p. 61.5 °C.  $[\alpha]_D^{15} = -84.6$  (*c* 0.22, CH<sub>2</sub>Cl<sub>2</sub>); The product was analyzed by HPLC to determine the enantiomeric excess: 95% ee (Chiralpak OD-H, i-propanol/hexane = 10/90, flow rate 1.0 mL/min, λ = 230 nm); *t<sub>r</sub>* = 13.81 and 15.15 min.

<sup>1</sup>H NMR (400 MHz, Chloroform-*d*) δ 7.35 – 7.28 (m, 2H), 6.58 (d, *J* = 9.0 Hz, 1H), 6.22 – 6.15 (m, 1H), 6.01 (ddd, *J* = 17.4, 10.7, 5.6 Hz, 1H), 5.85 – 5.77 (m, 1H), 5.45 – 5.29 (m, 2H), 4.45 (d, *J* = 5.2 Hz, 2H), 1.44 (s, 9H).

<sup>13</sup>C NMR (101 MHz, Chloroform-*d*) δ 162.3, 153.0, 139.2, 135.3, 132.5, 120.9, 120.1, 105.9, 82.7, 66.0, 55.7, 27.6.

HRMS (ESI+) Calcd. For C<sub>14</sub>H<sub>19</sub>NO<sub>3</sub>Na<sup>+</sup> ([M+Na]<sup>+</sup>): 272.1257, found: 272.1261.

### HPLC chromatogram of compound 3u

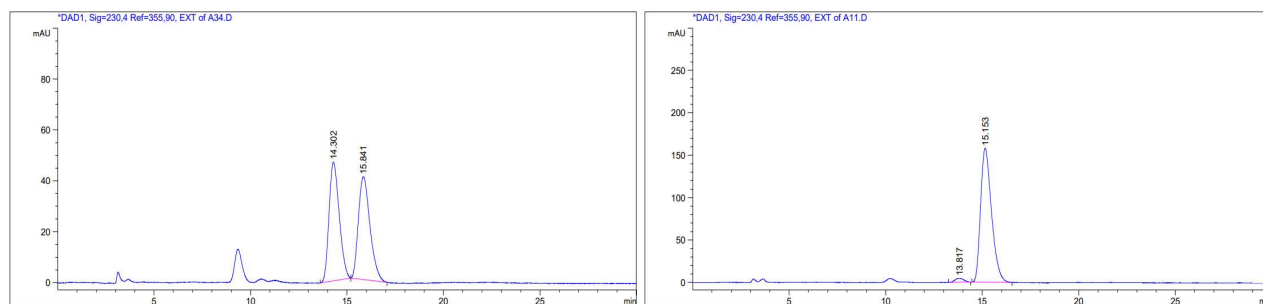

| Peak # | RetTime [min] | Type | Width [min] | Area [mAU*s] | Height [mAU] | Area %  | Peak # | RetTime [min] | Type | Width [min] | Area [mAU*s] | Height [mAU] | Area %  |
|--------|---------------|------|-------------|--------------|--------------|---------|--------|---------------|------|-------------|--------------|--------------|---------|
| 1      | 14.302        | BB   | 0.4422      | 1714.24634   | 46.70810     | 50.3212 | 1      | 13.817        | BB   | 0.3821      | 156.52882    | 4.81761      | 2.4573  |
| 2      | 15.841        | BB   | 0.4944      | 1692.36511   | 40.42622     | 49.6788 | 2      | 15.153        | BV R | 0.5051      | 6213.51904   | 158.24599    | 97.5427 |

## 5. Control experiments and mechanistic investigations

### a) Investigation of kinetic resolution

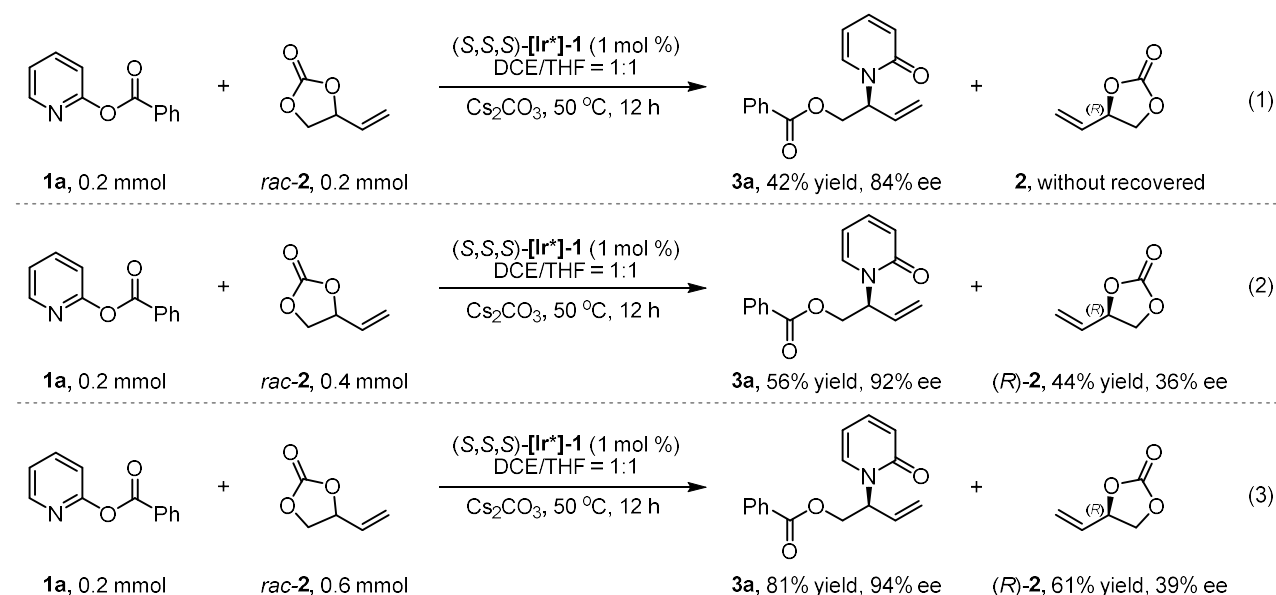

A flame dried Schlenk tube was cooled to rt, and it was then evacuated and backfilled with argon for three times. To this Schlenk tube was added  $(S,S,S)$ -[Ir\*]-1 (0.002 mmol, 1 mol%), pyridine **1a** (0.20 mmol, 1 equiv.), *rac*-**2** (0.2 mmol, 1 equiv.) and DCE:THF = 1:1 (2 mL). The reaction was stirred at 50 °C for 12 hours. Once starting material was consumed (monitored by TLC), the solvent was evaporated under reduced pressure, and the residue was purified by column chromatography to give the desired product, which was then directly analyzed by HPLC to determine the enantiomeric excess. And recovered *rac*-**2** in Scheme (b and c) was then directly analyzed by GC to determine the enantiomeric excess.



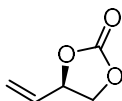

**(R)-4-vinyl-1,3-dioxolan-2-one (2):** yield (44%); colorless oil;  $[\alpha]_D^{15} = 4.1$  ( $c$  0.72,  $\text{CH}_2\text{Cl}_2$ ); The product was analyzed by GC to determine the enantiomeric excess: 39% ee (Beta DEX-390,  $\text{N}_2$  flow rate 1.0 mL/min, 60 min at 150 °C);  $t_r = 18.54$  and 19.41 min.

$^1\text{H NMR}$  (400 MHz, Chloroform- $d$ )  $\delta$  5.92 (ddd,  $J = 17.3, 10.4, 7.0$  Hz, 1H), 5.58 – 5.41 (m, 2H), 5.24 – 5.09 (m, 1H), 4.70 – 4.57 (m, 1H), 4.23 – 4.12 (m, 1H).

$^{13}\text{C NMR}$  (101 MHz, Chloroform- $d$ )  $\delta$  154.7, 132.0, 121.1, 77.3, 69.0.

### GC chromatogram of compound (R)-2

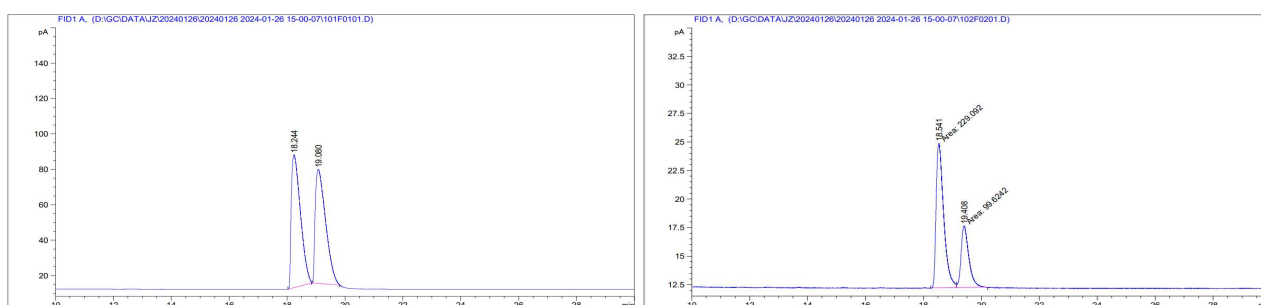

| Peak # | RetTime [min] | Type | Width [min] | Area [pA*s] | Height [pA] | Area %   | Peak # | RetTime [min] | Type | Width [min] | Area [pA*s] | Height [pA] | Area %   |
|--------|---------------|------|-------------|-------------|-------------|----------|--------|---------------|------|-------------|-------------|-------------|----------|
| 1      | 18.244        | BB   | 0.2935      | 1643.62683  | 75.03956    | 50.67947 | 1      | 18.541        | MF   | 0.3015      | 229.09244   | 12.66524    | 69.69300 |
| 2      | 19.080        | BB   | 0.2996      | 1599.55408  | 64.22037    | 49.32053 | 2      | 19.408        | FM   | 0.3072      | 99.62415    | 5.40478     | 30.30700 |

### b) Cross-over experiments

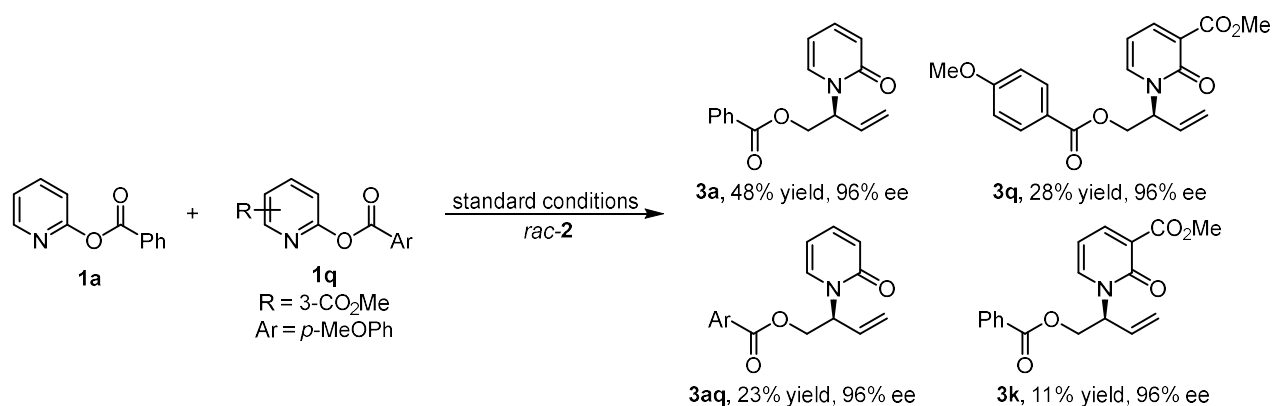

A flame dried Schlenk tube was cooled to rt, and it was then evacuated and backfilled with argon for three times. To this Schlenk tube was added (*S,S,S*)-[Ir\*]-**1** (0.002 mmol, 1 mol %), pyridine **1a** (0.20 mmol, 1.0 equiv.), **1q** (0.20 mmol, 1.0 equiv.), VEC **2** (1.2 mmol, 6 equiv.),  $\text{Cs}_2\text{CO}_3$  (0.4 mmol, 2 equiv.) and  $\text{DCE}:\text{THF} = 1:1$  (4 mL). The reaction was stirred at 50 °C for 12 hours. Once

starting material was consumed (monitored by TLC), the solvent was evaporated under reduced pressure and the residue was purified by column chromatography to give the products **3a**, **3q**, **3aq** and **3k**, which were then directly analyzed by HPLC to determine the enantiomeric excess.

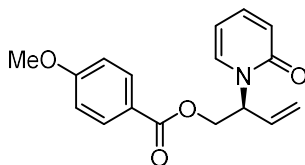

**(S)-2-(2-oxopyridin-1(2H)-yl)but-3-en-1-yl 4-methoxybenzoate (3aq)**: yield (23%); colorless oil;  $[\alpha]_D^{15} = -28.9$  ( $c$  0.20,  $\text{CH}_2\text{Cl}_2$ ); The product was analyzed by HPLC to determine the enantiomeric excess: 96% ee (Chiralpak OD-H,  $i$ -propanol/hexane = 20/80, flow rate 1.0 mL/min,  $\lambda = 230$  nm);  $t_r = 13.48$  and 17.08 min.

$^1\text{H NMR}$  (400 MHz, Chloroform- $d$ )  $\delta$  7.91 (d,  $J = 8.5$  Hz, 2H), 7.39 – 7.29 (m, 2H), 6.90 (d,  $J = 8.5$  Hz, 2H), 6.61 (d,  $J = 9.1$  Hz, 1H), 6.23 – 6.16 (m, 1H), 6.10 – 5.98 (m, 2H), 5.50 – 5.32 (m, 2H), 4.73 – 4.59 (m, 2H), 3.85 (s, 3H).

$^{13}\text{C NMR}$  (101 MHz, Chloroform- $d$ )  $\delta$  165.7, 163.6, 162.4, 139.3, 134.9, 132.7, 131.7, 121.8, 120.9, 120.1, 113.7, 106.1, 63.8, 55.4, 55.2.

**HRMS** (ESI+) Calcd. For  $\text{C}_{17}\text{H}_{17}\text{NO}_4\text{Na}^+$  ( $[\text{M}+\text{Na}]^+$ ): 322.1050, found: 322.1052.

### HPLC chromatogram of compound 3aq

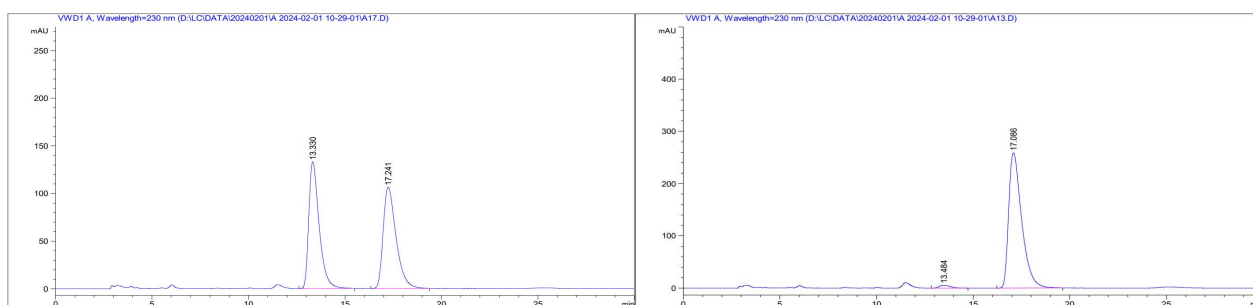

| Peak # | RetTime [min] | Type | Width [min] | Area [mAU*s] | Height [mAU] | Area %  | Peak # | RetTime [min] | Type | Width [min] | Area [mAU*s] | Height [mAU] | Area %  |
|--------|---------------|------|-------------|--------------|--------------|---------|--------|---------------|------|-------------|--------------|--------------|---------|
| 1      | 13.330        | BV R | 0.5673      | 4959.12451   | 133.07643    | 50.1606 | 1      | 13.484        | BB   | 0.4883      | 223.17181    | 5.65228      | 1.8132  |
| 2      | 17.241        | BV R | 0.6997      | 4927.36621   | 106.26189    | 49.8394 | 2      | 17.086        | BB   | 0.7122      | 1.20852e4    | 258.80353    | 98.1868 |

## 6. Synthetic transformation



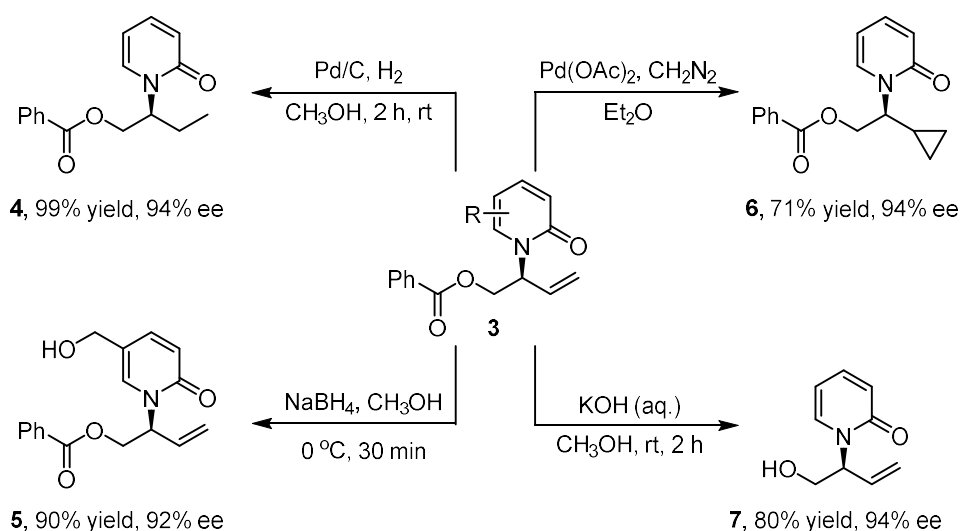

### (*S*)-2-(2-oxopyridin-1(2H)-yl)butyl benzoate (**4**)

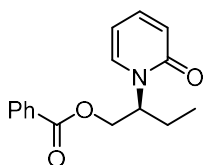

A 10 mL dried Schlenk tube equipped with magnetic stirring bar. Then, (*S*)-**3a** (26.9 mg, 0.1 mmol), Pd/C (5.3 mg, 0.05 equiv.) and MeOH (2.0 mL) were added, respectively. The mixtures were degassed and stirred at room temperature under H<sub>2</sub> balloon pressure for 2 h. After completion, the solution was filtered via Kieselguhr and washed with DCM. The filtrate was concentrated in vacuo. The mixtures were purified by column chromatography to give the desired product **4**.

yield (99%); colorless oil;  $[\alpha]_D^{15} = -122.6$  (*c* 0.26, CH<sub>2</sub>Cl<sub>2</sub>); The product was analyzed by HPLC to determine the enantiomeric excess: 94% ee (Chiralpak OD-H, i-propanol/hexane = 15/85, flow rate 1.0 mL/min,  $\lambda = 230$  nm);  $t_r = 15.05$  and 16.46 min.

**<sup>1</sup>H NMR** (400 MHz, Chloroform-*d*)  $\delta$  7.96 (dd, *J* = 7.9, 1.5 Hz, 2H), 7.61 – 7.52 (m, 1H), 7.48 – 7.39 (m, 2H), 7.37 – 7.26 (m, 2H), 6.60 (dd, *J* = 9.2, 1.3 Hz, 1H), 6.28 – 6.17 (m, 1H), 5.42 – 5.22 (m, 1H), 4.63 (dd, *J* = 11.8, 6.6 Hz, 1H), 4.51 (dd, *J* = 11.8, 4.1 Hz, 1H), 2.05 – 1.80 (m, 2H), 0.97 (t, *J* = 7.4 Hz, 3H).

**<sup>13</sup>C NMR** (101 MHz, Chloroform-*d*)  $\delta$  166.0, 162.8, 138.8, 133.9, 133.1, 129.5, 129.4, 128.4, 120.9, 106.1, 65.1, 55.4, 23.3, 10.3.

**HRMS** (ESI+) Calcd. For C<sub>16</sub>H<sub>18</sub>NO<sub>3</sub><sup>+</sup> ( $[M+H]^+$ ): 272.1281, found: 272.1279.

### HPLC chromatogram of compound **4**

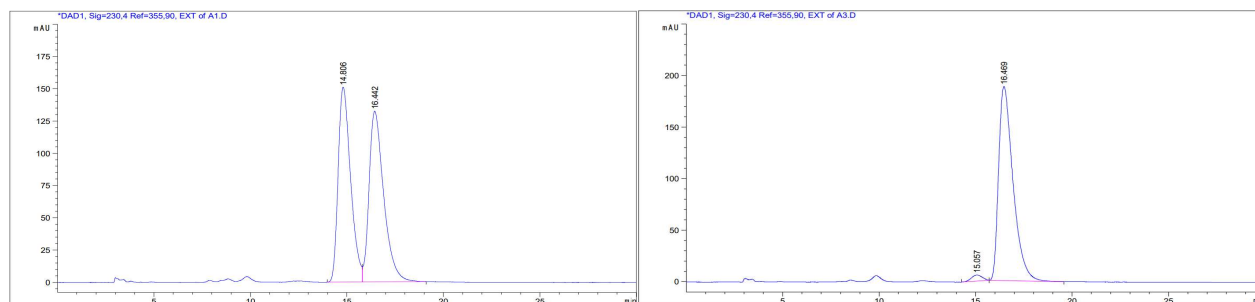

| Peak # | RetTime [min] | Type | Width [min] | Area [mAU*s] | Height [mAU] | Area %  | Peak # | RetTime [min] | Type | Width [min] | Area [mAU*s] | Height [mAU] | Area %  |
|--------|---------------|------|-------------|--------------|--------------|---------|--------|---------------|------|-------------|--------------|--------------|---------|
| 1      | 14.806        | BV   | 0.6869      | 6776.12646   | 151.19736    | 49.2197 | 1      | 15.057        | BB   | 0.4634      | 225.58276    | 5.85631      | 2.2619  |
| 2      | 16.442        | VB   | 0.7902      | 6990.96240   | 132.36012    | 50.7803 | 2      | 16.469        | BB   | 0.7691      | 9747.52441   | 187.93161    | 97.7381 |

### (S)-2-(5-(hydroxymethyl)-2-oxopyridin-1(2H)-yl)but-3-en-1-yl benzoate (**5**)

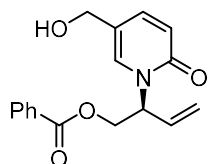

A 10 mL dried flask equipped with magnetic stirring bar. Then, (*S*)-**3a** (53.8 mg, 0.2 mmol) and MeOH (2.0 mL) were added, respectively. Add sodium borodeuteride (15 mg, 0.4 mmol) to solution slowly at 0 °C. The mixture was allowed to react at this temperature and stir for 30 min. After completion, the solution was filtered via Kieselguhr and washed with ethyl acetate. The filtrate was concentrated in vacuo. The mixtures were purified by column chromatography to give the desired product **5**.

yield (75%); colorless oil;  $[\alpha]_D^{15} = -96.3$  (*c* 0.25, CH<sub>2</sub>Cl<sub>2</sub>); The product was analyzed by HPLC to determine the enantiomeric excess: 92% ee (Chiralpak AD-H, i-propanol/hexane = 20/80, flow rate 1.0 mL/min,  $\lambda = 230$  nm);  $t_r = 39.71$  and 45.01 min.

<sup>1</sup>H NMR (400 MHz, Chloroform-*d*)  $\delta$  7.97 – 7.90 (m, 2H), 7.59 – 7.50 (m, 1H), 7.44 – 7.38 (m, 3H), 7.37 – 7.31 (m, 1H), 6.56 (d, *J* = 9.2 Hz, 1H), 6.08 – 5.95 (m, 2H), 5.49 – 5.34 (m, 2H), 4.71 – 4.60 (m, 2H), 4.48 – 4.35 (m, 2H).

<sup>13</sup>C NMR (101 MHz, Chloroform-*d*)  $\delta$  165.9, 162.2, 139.7, 133.3, 132.8, 132.4, 129.6, 129.3, 128.4, 120.6, 120.4, 119.4, 64.0, 61.7, 55.2.

HRMS (ESI+) Calcd. For C<sub>17</sub>H<sub>18</sub>NO<sub>4</sub><sup>+</sup> ([M+H]<sup>+</sup>): 300.1230, found: 300.1231.

### HPLC chromatogram of compound **5**

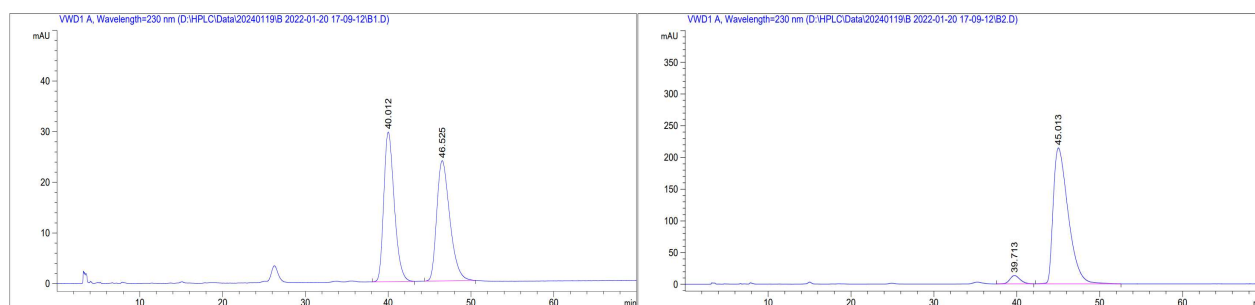

| Peak # | RetTime [min] | Type | Width [min] | Area [mAU*s] | Height [mAU] | Area %  | Peak # | RetTime [min] | Type | Width [min] | Area [mAU*s] | Height [mAU] | Area %  |
|--------|---------------|------|-------------|--------------|--------------|---------|--------|---------------|------|-------------|--------------|--------------|---------|
| 1      | 40.012        | BB   | 1.2920      | 2595.79199   | 29.54593     | 49.9451 | 1      | 39.713        | BB   | 1.2452      | 1123.67834   | 13.14663     | 4.0157  |
| 2      | 46.525        | BB   | 1.5654      | 2601.49658   | 23.72182     | 50.0549 | 2      | 45.013        | BB   | 1.9401      | 2.68583e4    | 214.16632    | 95.9843 |

**(S)-2-cyclopropyl-2-(2-oxopyridin-1(2H)-yl)ethyl benzoate (6)**

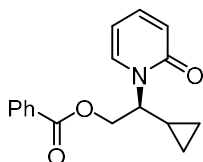

To a Schlenk tube were added fresh prepared diazomethane solution (0.5 M in Et<sub>2</sub>O, 2 mL) and (*S*)-**3a** (29.4 mg, 0.1 mmol) under a positive nitrogen pressure. The reaction mixture was cooled to -20 °C, and then Pd(OAc)<sub>2</sub> (1.5 mg, 2 mol %) was added in one portion with gas evolution. After stirring for 1 hour at -20 °C, the reaction was moved to room temperature and stirred overnight. While the reaction was completed, the solvent was removed under reduced pressure and the residue was purified by a flash column chromatography to afford the product (*S*)-**6**.

yield (71%); yellow oil;  $[\alpha]_D^{15} = -151.4$  (*c* 0.25, CH<sub>2</sub>Cl<sub>2</sub>); The product was analyzed by HPLC to determine the enantiomeric excess: 94% ee (Chiralpak AS-H, i-propanol/hexane = 10/90, flow rate 0.5 mL/min,  $\lambda = 230$  nm);  $t_r = 63.18$  and 74.81 min.

<sup>1</sup>H NMR (400 MHz, Chloroform-*d*)  $\delta$  7.96 (d, *J* = 7.7 Hz, 2H), 7.63 – 7.53 (m, 2H), 7.48 – 7.39 (m, 2H), 7.35 – 7.29 (m, 1H), 6.58 (d, *J* = 9.1 Hz, 1H), 6.26 – 6.21 (m, 1H), 4.74 – 4.62 (m, 2H), 4.57 – 4.47 (m, 1H), 1.44 – 1.32 (m, 1H), 0.91 – 0.78 (m, 1H), 0.68 – 0.58 (m, 2H), 0.44 – 0.35 (m, 1H).

<sup>13</sup>C NMR (101 MHz, Chloroform-*d*)  $\delta$  166.1, 162.6, 139.1, 134.7, 133.2, 129.62, 129.56, 128.4, 120.7, 105.9, 65.3, 59.9, 11.4, 6.3, 3.7.

HRMS (ESI+) Calcd. For C<sub>17</sub>H<sub>18</sub>NO<sub>3</sub><sup>+</sup> ([M+H]<sup>+</sup>): 284.1281, found: 284.1282.

**HPLC chromatogram of compound 6**

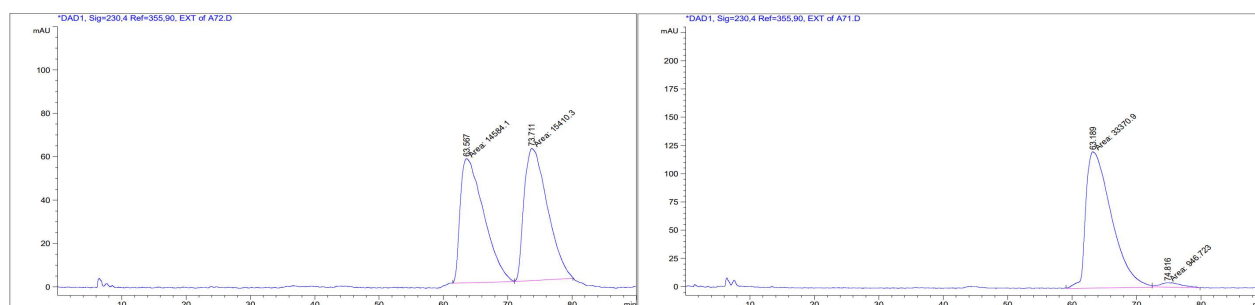

| Peak # | RetTime [min] | Type | Width [min] | Area [mAU*s] | Height [mAU] | Area %  | Peak # | RetTime [min] | Type | Width [min] | Area [mAU*s] | Height [mAU] | Area %  |
|--------|---------------|------|-------------|--------------|--------------|---------|--------|---------------|------|-------------|--------------|--------------|---------|
| 1      | 63.567        | MM   | 4.2441      | 1.45841e4    | 57.27205     | 48.6228 | 1      | 63.189        | MF   | 4.6054      | 3.33709e4    | 120.76711    | 97.2413 |
| 2      | 73.711        | MM   | 4.2128      | 1.54103e4    | 60.96613     | 51.3772 | 2      | 74.816        | MM   | 3.9480      | 946.72284    | 3.99664      | 2.7587  |

### (S)-1-(1-hydroxybut-3-en-2-yl)pyridin-2(1H)-one (7)

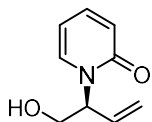

A 10 mL dried flask equipped with magnetic stirring bar. Then, (*S*)-**3a** (53.8 mg, 0.2 mmol) and MeOH (2.0 mL) were added, respectively. Add KOH (aq., 1 M) to solution slowly at room temperature. The mixture was allowed to react at this temperature and stir for 2 h. After completion, the aqueous phase was extracted with ethyl acetate. the combined organic layers were washed with brine, dried by Na<sub>2</sub>SO<sub>4</sub> and concentrate in vacuo. The mixture was purified by column chromatography to give the desired product **7**.

yield (80%); white solid; m.p. 89 °C. [ $\alpha$ ]<sub>D</sub><sup>15</sup> = -62.3 (*c* 0.23, CH<sub>2</sub>Cl<sub>2</sub>); The product was analyzed by HPLC to determine the enantiomeric excess: 92% ee (Chiralpak AS-H, i-propanol/hexane = 25/75, flow rate 1.0 mL/min,  $\lambda$  = 230 nm); *t*<sub>r</sub> = 18.58 and 23.79 min.

<sup>1</sup>H NMR (400 MHz, Chloroform-*d*)  $\delta$  7.42 – 7.30 (m, 2H), 6.57 (d, *J* = 9.1 Hz, 1H), 6.29 – 6.21 (m, 1H), 6.07 – 5.96 (m, 1H), 5.64 – 5.55 (m, 1H), 5.41 (d, *J* = 10.6 Hz, 1H), 5.30 (dd, *J* = 17.4, 1.7 Hz, 1H), 4.08 – 4.00 (m, 1H), 3.98 – 3.90 (m, 1H), 3.72 – 3.64 (m, 1H).

<sup>13</sup>C NMR (101 MHz, Chloroform-*d*)  $\delta$  163.3, 139.5, 135.6, 133.0, 120.6, 119.6, 106.5, 63.5, 59.6.

HRMS (ESI+) Calcd. For C<sub>9</sub>H<sub>12</sub>NO<sub>2</sub><sup>+</sup> ([M+H]<sup>+</sup>): 166.0863, found: 166.0863.

### HPLC chromatogram of compound 7

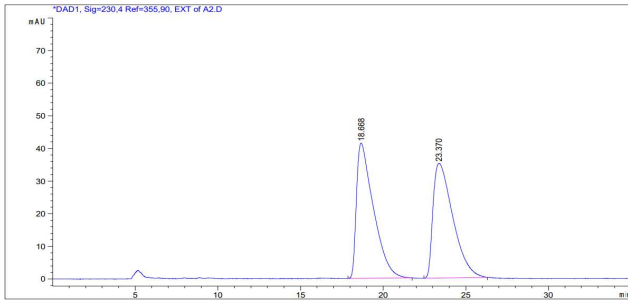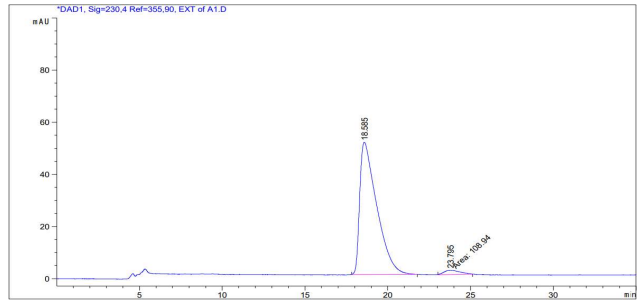

| Peak # | RetTime [min] | Type | Width [min] | Area [mAU*s] | Height [mAU] | Area %  | Peak # | RetTime [min] | Type | Width [min] | Area [mAU*s] | Height [mAU] | Area %  |
|--------|---------------|------|-------------|--------------|--------------|---------|--------|---------------|------|-------------|--------------|--------------|---------|
| 1      | 18.668        | BB   | 0.9670      | 2958.33472   | 41.43552     | 50.2938 | 1      | 18.585        | BB   | 0.9600      | 3624.26050   | 50.69770     | 97.0819 |
| 2      | 23.370        | BB   | 0.9826      | 2923.77417   | 35.14412     | 49.7062 | 2      | 23.795        | MM   | 1.0831      | 108.93979    | 1.67630      | 2.9181  |

## 7. Reference

- (1) Li, S.-L.; Wang, G.; Ye, Z.-S. Difluorocarbene Enabled Ester Insertion/1,4-Acyl Rearrangement of 2-Acetoxy pyridines: Modular Access to *gem*-Difluoromethylenated 2-Pyridones. *Tetrahedron Lett.* **2023**, *119*, 154413.
- (2) Su, J.-H.; Yan, Z.-C.; Sun, J.-T. Rhodium-Catalyzed N-Arylation of 2-Pyridones Enabled by 1,6-Acyl Migratory Rearrangement of 2-Oxypyridines. *Org. Lett.* **2023**, *25*, 1974-1977.
- (3) Yi, Z.-Y.; Xiao, L.; Chang, X.; Dong, X.-Q.; Wang, C.-J. Iridium-Catalyzed Asymmetric Cascade Allylation/Retro-Claisen Reaction. *J. Am. Chem. Soc.* **2022**, *144*, 20025-20034.
- (4) Hamilton, J. Y.; David, S.; Carreira, E. M. Iridium-Catalyzed Enantioselective Allyl-Alkene Coupling. *J. Am. Chem. Soc.* **2014**, *136*, 3006-3009.
- (5) Smith, C. R.; Mans, D. J.; Rajanbabu, T. V. (*R*)-2,2'-Binaphthoyl-(*S,S*)-Di(1-Phenylethyl) Aminophosphine. Scalable Protocols for the Syntheses of Phosphoramidite (Feringa) Ligands. *Org. Synth.* **2008**, *85*, 238-247.
- (6) Helmchen, G. Discussion Addendum for: Dibenzo[*a,e*]cyclooctene: Multigram Synthesis of a Bidentate Ligand. *Org. Synth.* **2020**, *97*, 66-78.
- (7) Spiess, S.; Jevgenij, J. A.; Gnam, C. Brödner, K.; Helmchen, G. Ir-Catalyzed Asymmetric Allylic Substitutions with (Phosphoramidite)Ir Complexes-Resting States, Synthesis, and Characterization of Catalytically Active ( $\pi$ -Allyl)Ir Complexes. *Chem. Eur. J.* **2009**, *15*, 11087-11090.
- (8) Xiao, L.; Wei, L.; Wang, C.-J. Stereodivergent Synthesis of Enantioenriched  $\gamma$ -Butyrolactones Bearing Two Vicinal Stereocenters Enabled by Synergistic Copper and Iridium Catalysis. *Angew. Chem. Int. Ed.* **2021**, *60*, 24930-24940.
- (9) Khan, S.; Shah, B. H.; Khan, I.; Li, M.; and Zhang, Y. J.; Pd-Catalyzed regio- and enantioselective allylic substitution with 2-pyridones. *Chem. Commun.* **2019**, *55*, 13168-13171.

## 8. NMR spectra

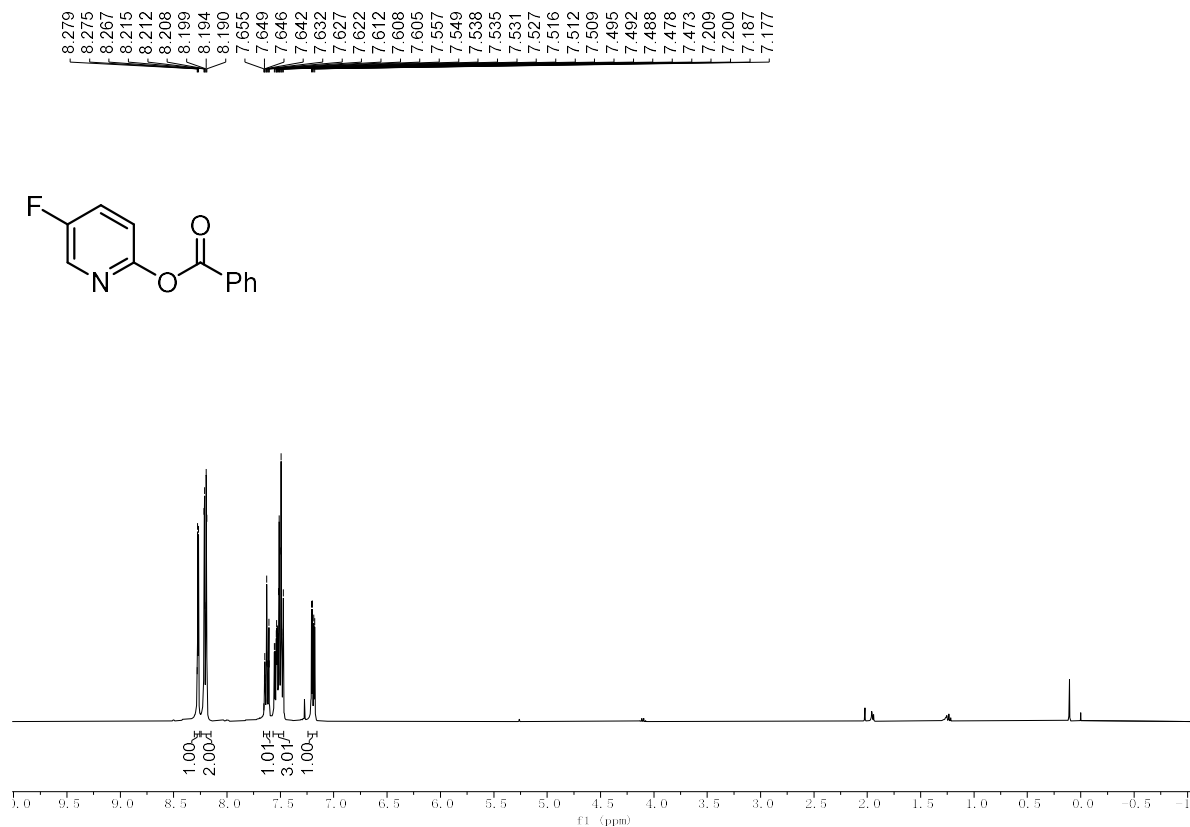

**<sup>1</sup>H NMR (400 MHz, CDCl<sub>3</sub>) of 1b**

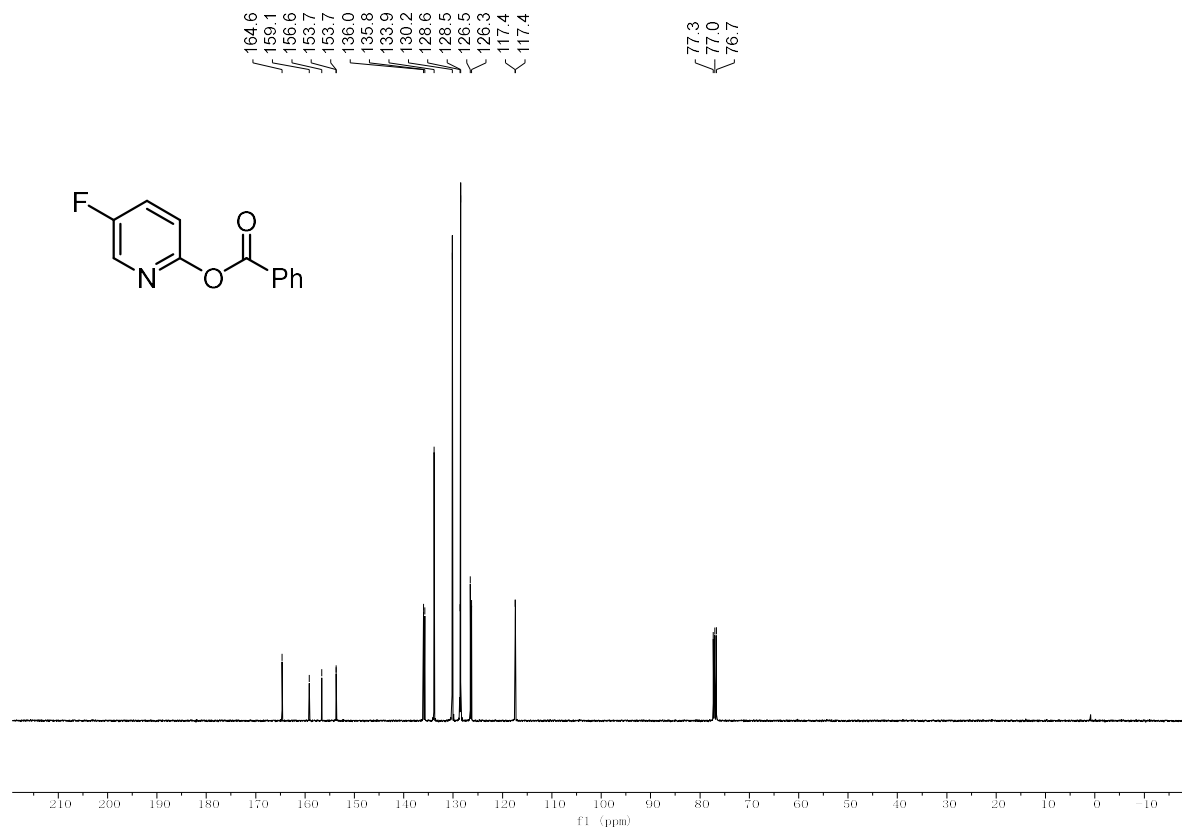

**<sup>13</sup>C NMR (101 MHz, CDCl<sub>3</sub>) of 1b**

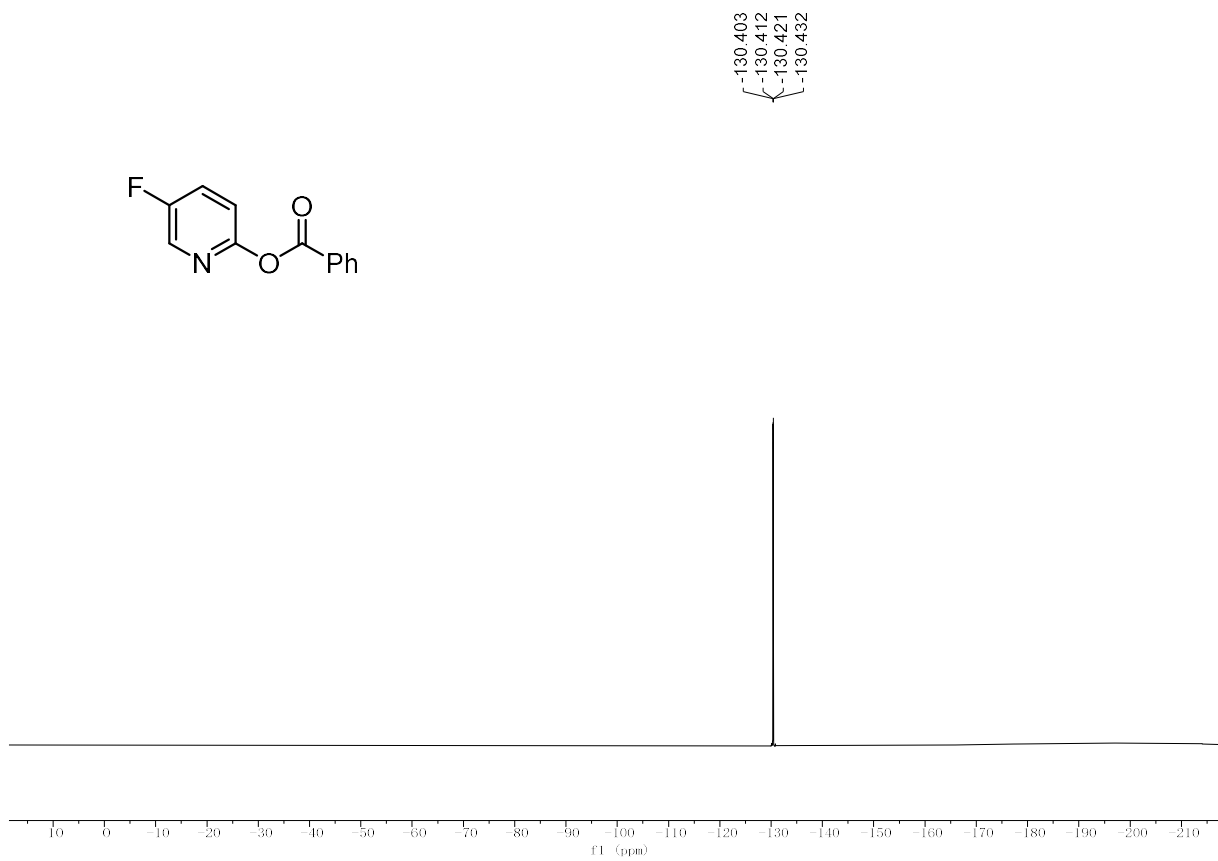



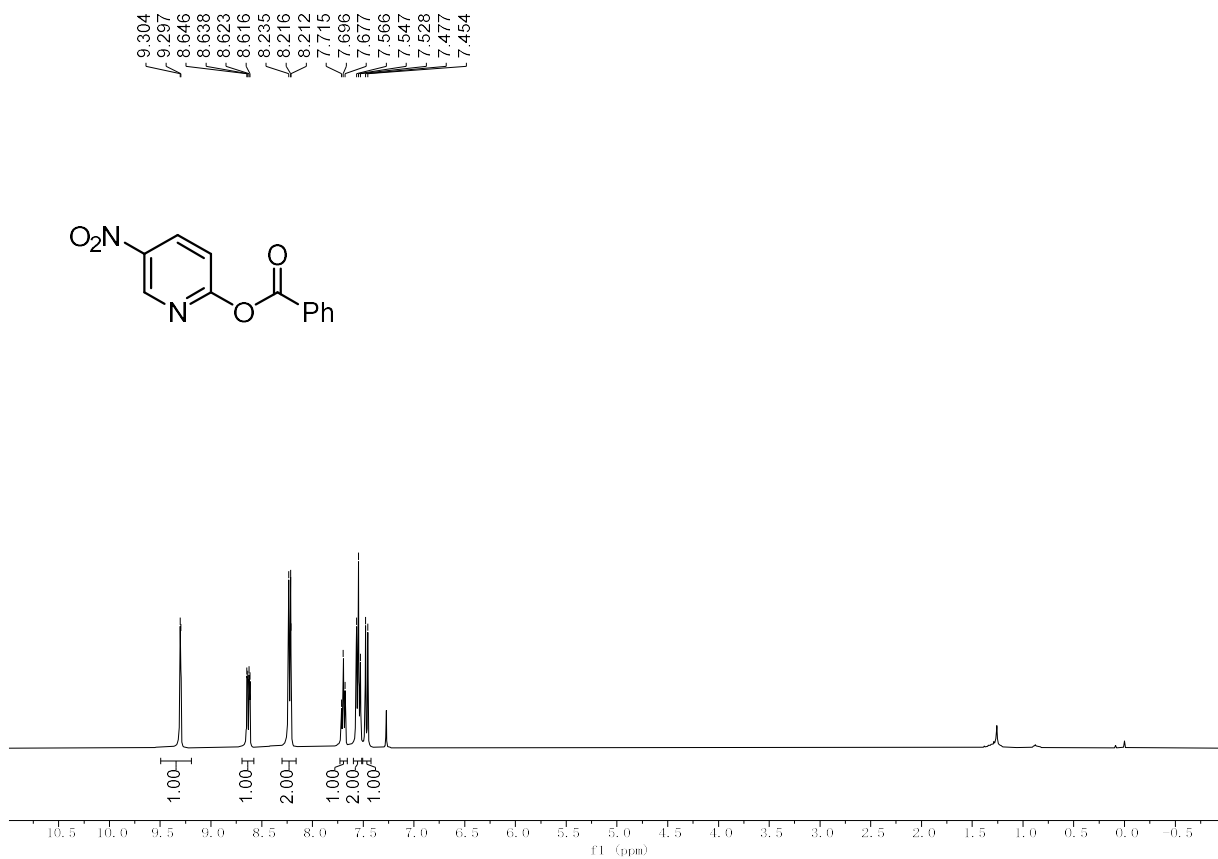

**<sup>1</sup>H NMR (400 MHz, CDCl<sub>3</sub>) of 1c**

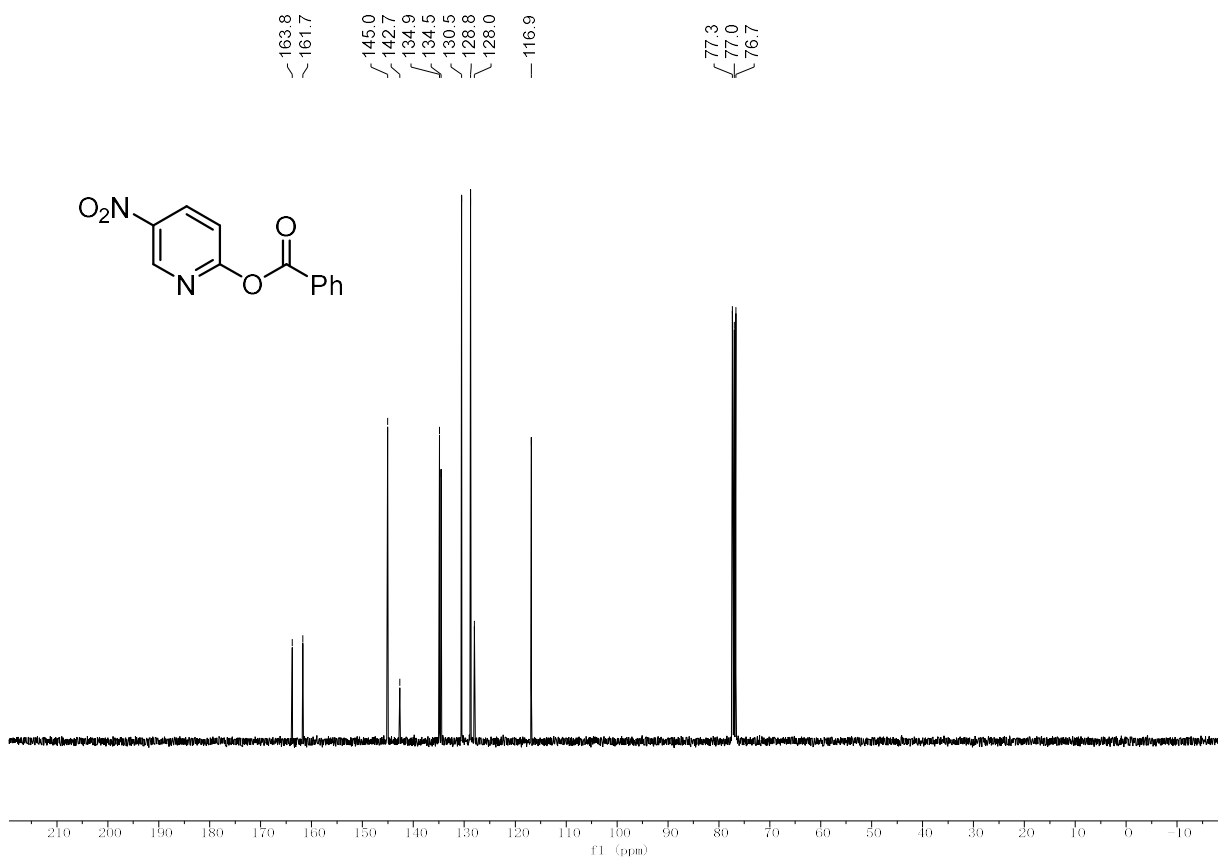

**<sup>13</sup>C NMR (101 MHz, CDCl<sub>3</sub>) of 1c**

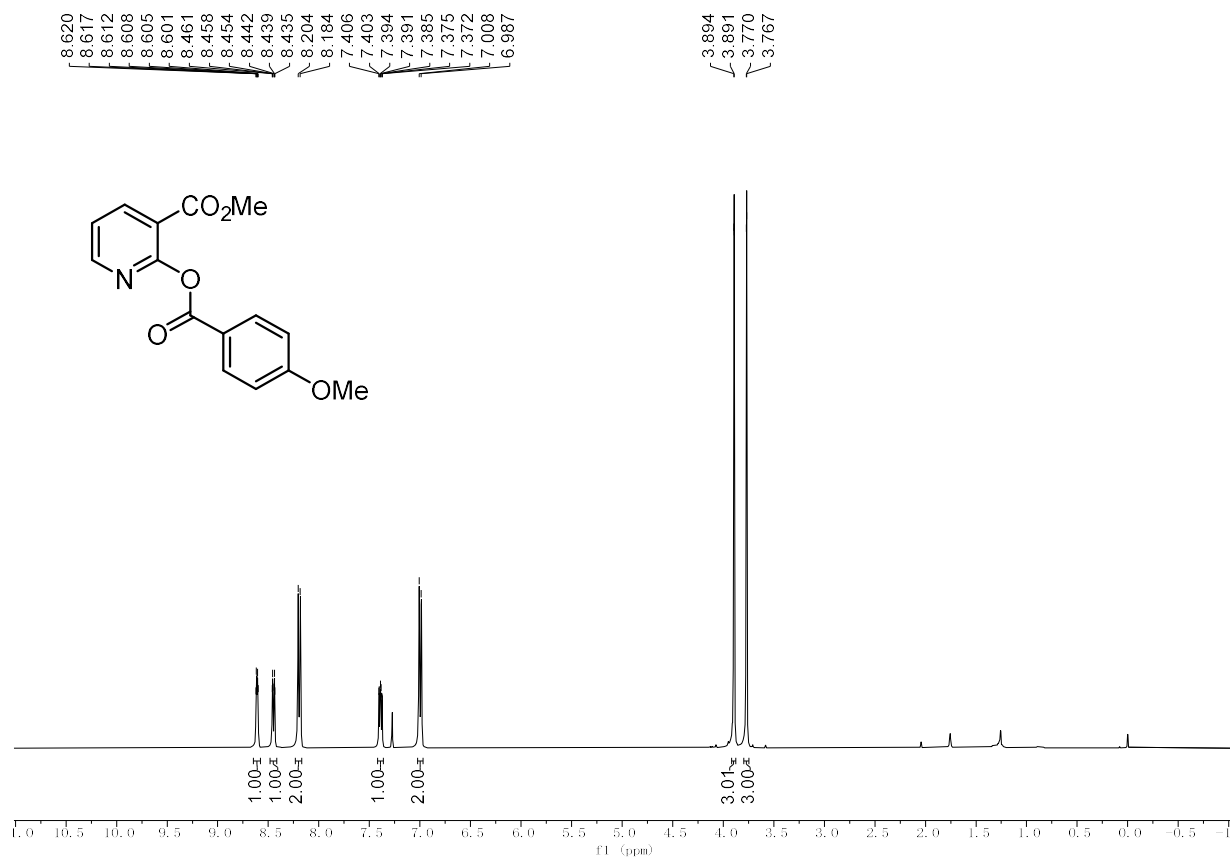

**<sup>1</sup>H NMR (400 MHz, CDCl<sub>3</sub>) of 1d**

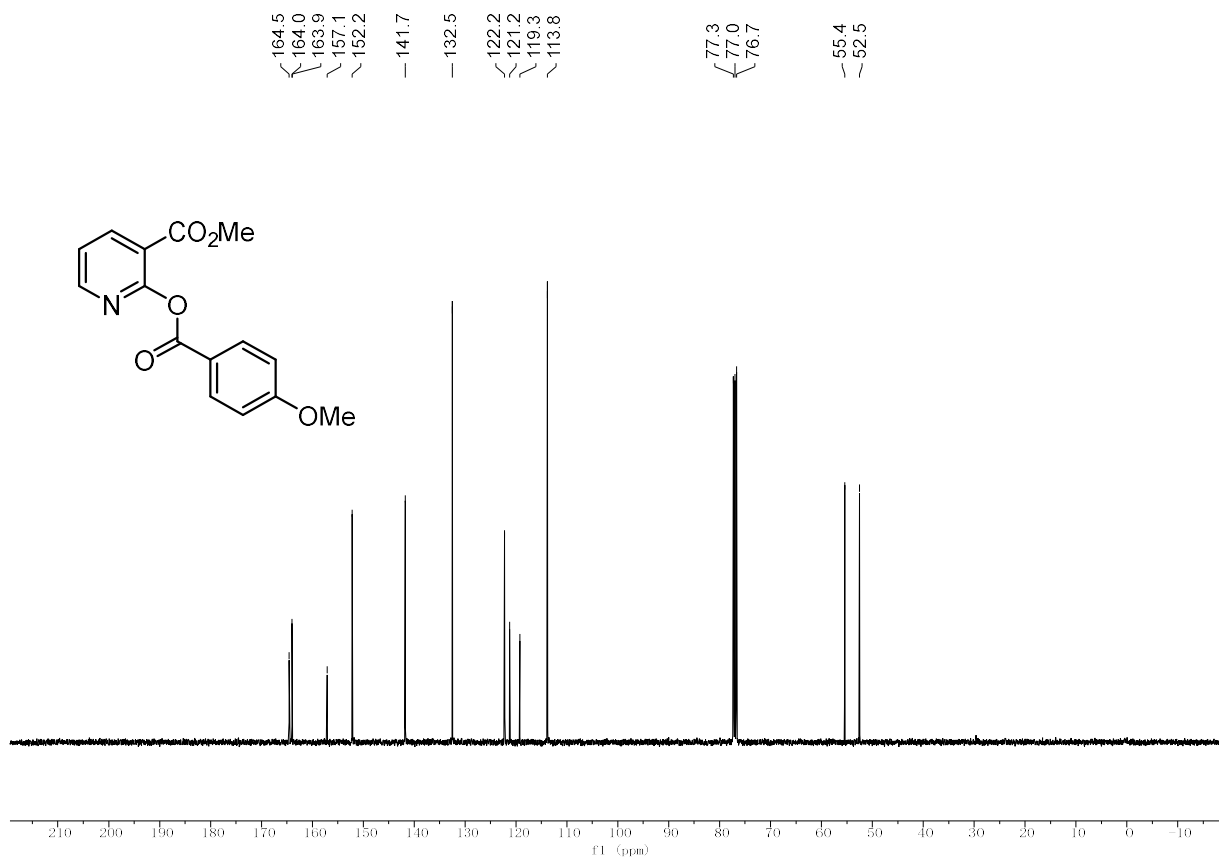

**<sup>13</sup>C NMR (101 MHz, CDCl<sub>3</sub>) of 1d**

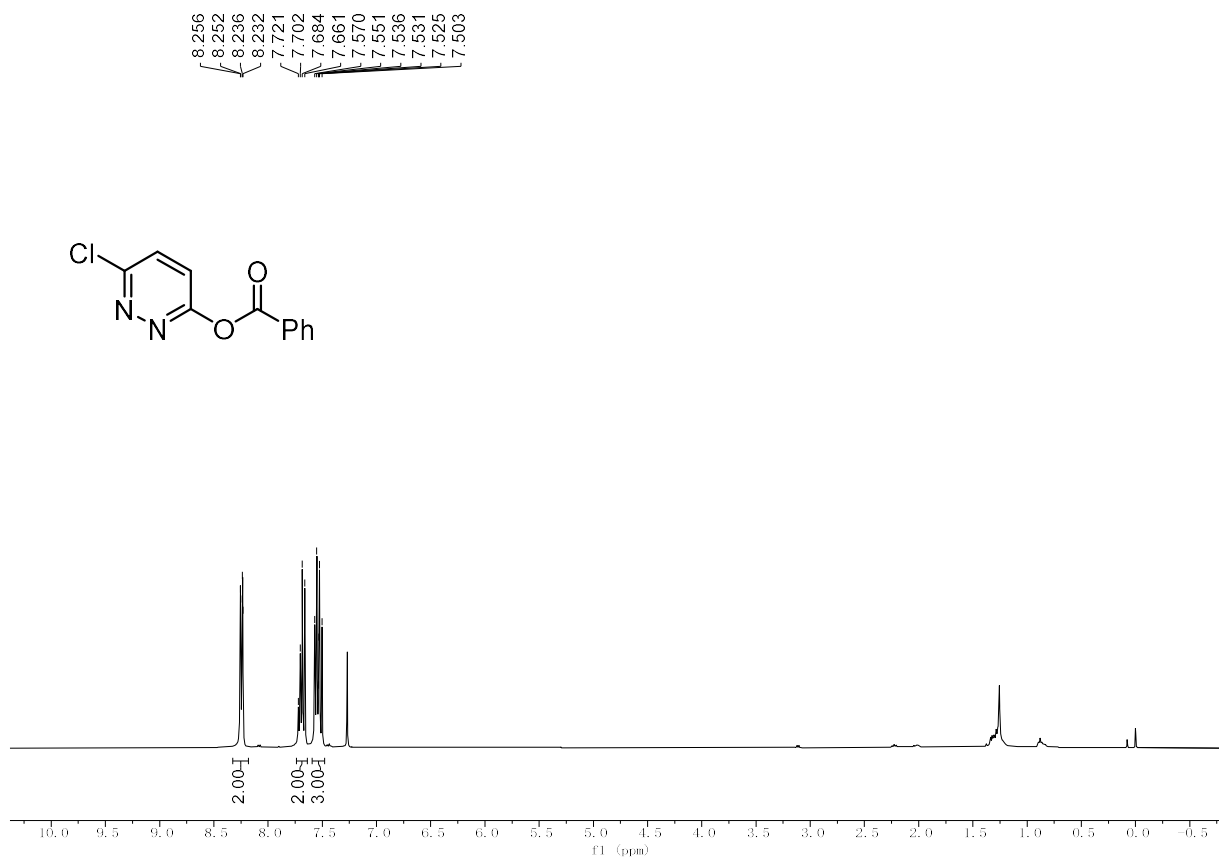

**<sup>1</sup>H NMR (400 MHz, CDCl<sub>3</sub>) of 1e**

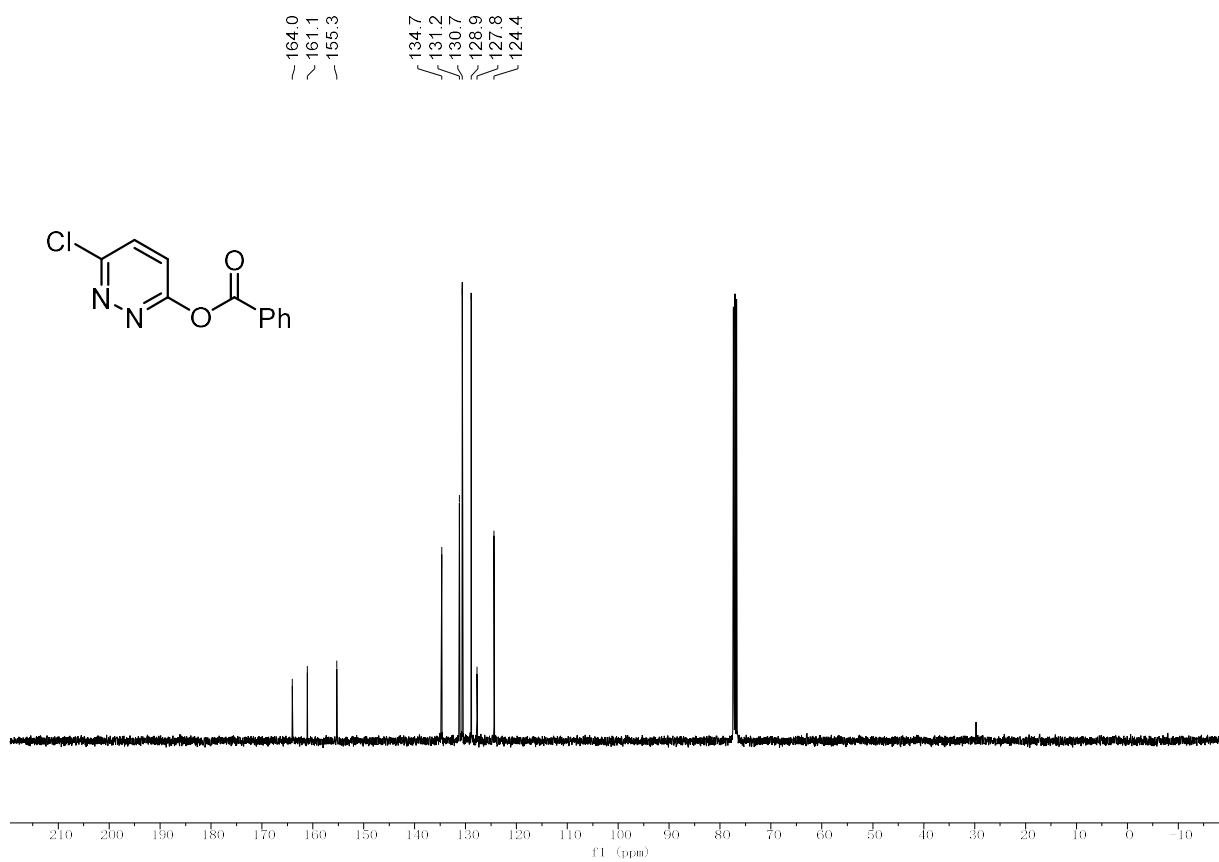

**<sup>13</sup>C NMR (101 MHz, CDCl<sub>3</sub>) of 1e**

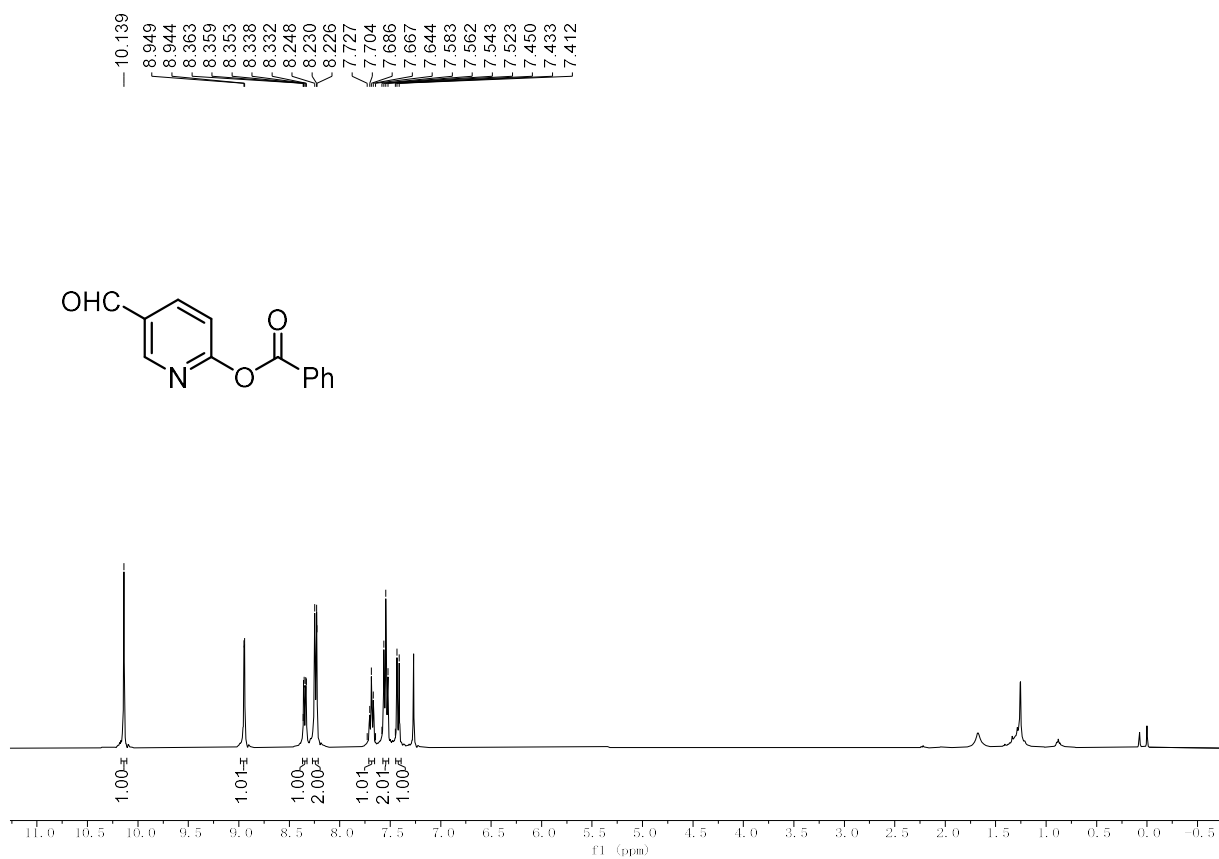

**<sup>1</sup>H NMR (400 MHz, CDCl<sub>3</sub>) of 1f**

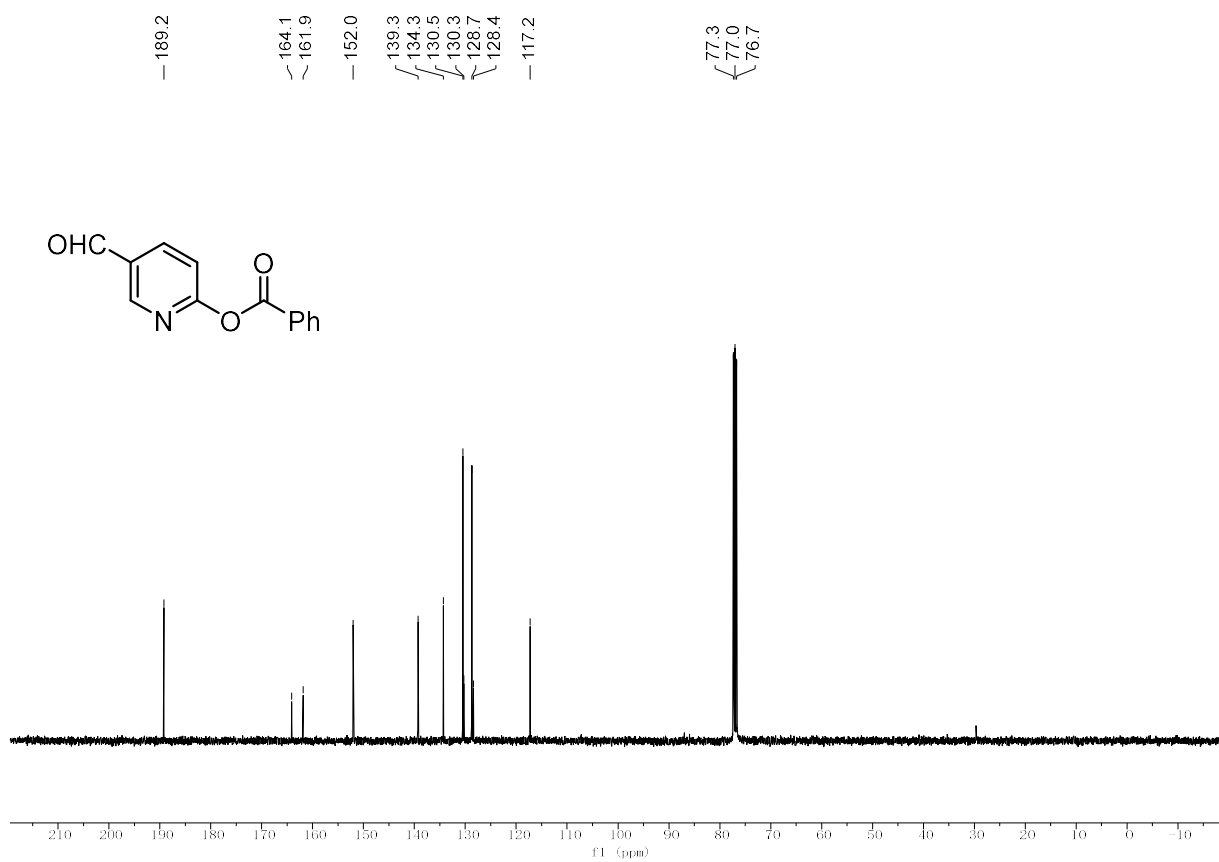

**<sup>13</sup>C NMR (101 MHz, CDCl<sub>3</sub>) of 1f**



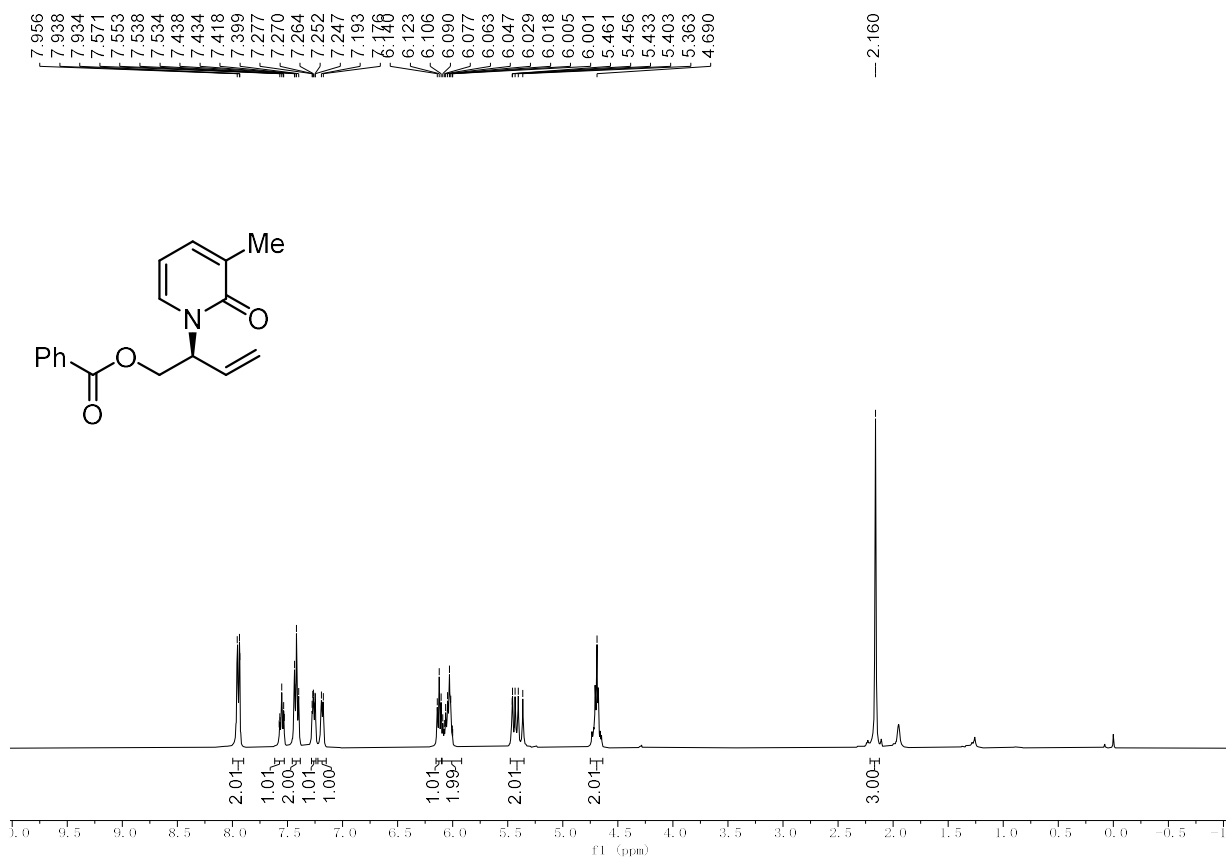

**<sup>1</sup>H NMR (400 MHz, CDCl<sub>3</sub>) of 3b**

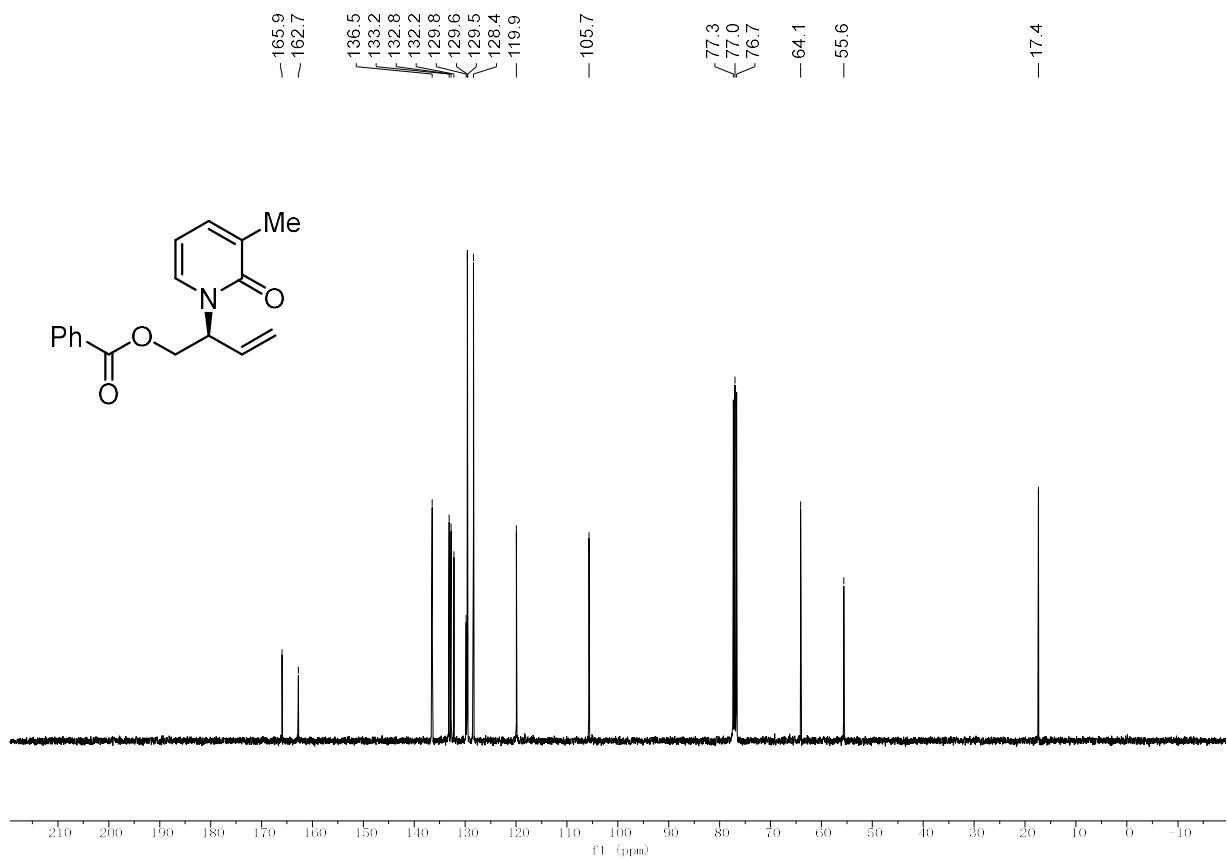

**<sup>13</sup>C NMR (101 MHz, CDCl<sub>3</sub>) of 3b**

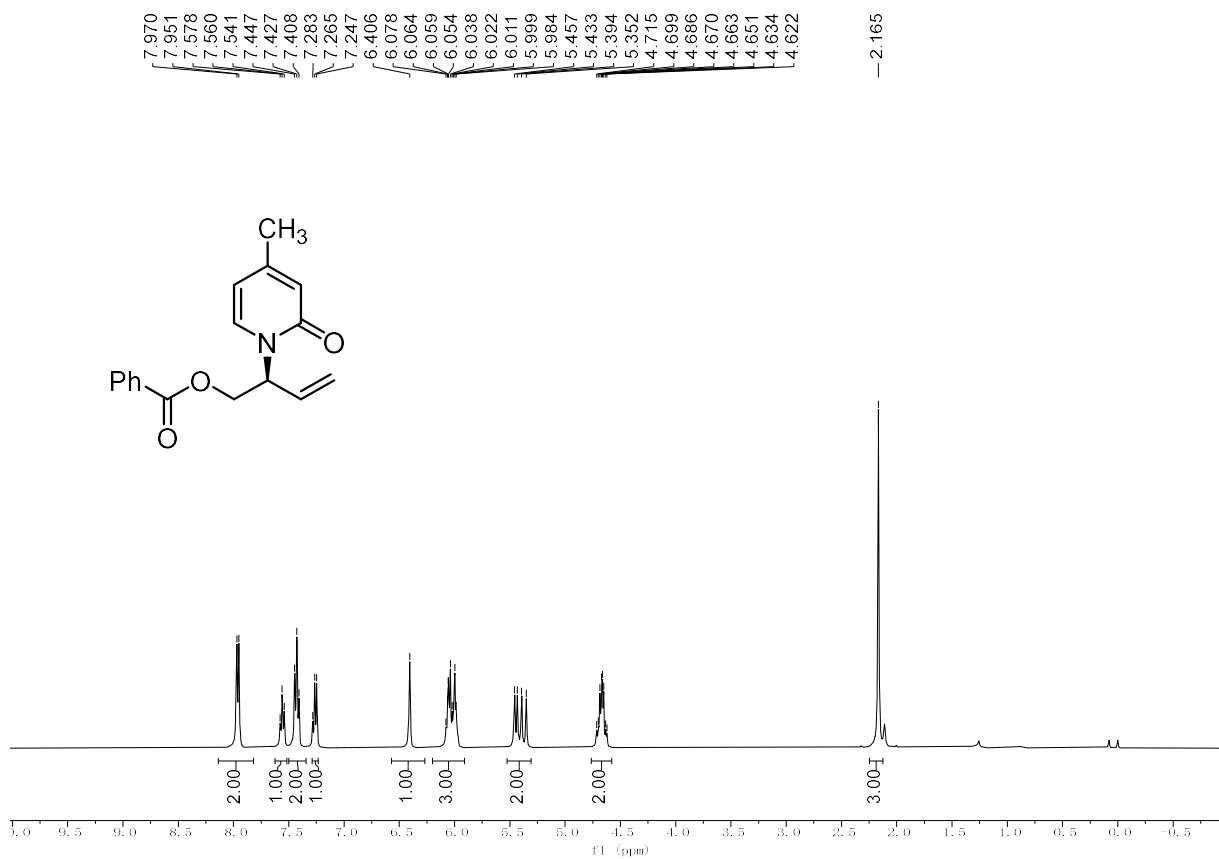

**<sup>1</sup>H NMR (400 MHz, CDCl<sub>3</sub>) of 3c**

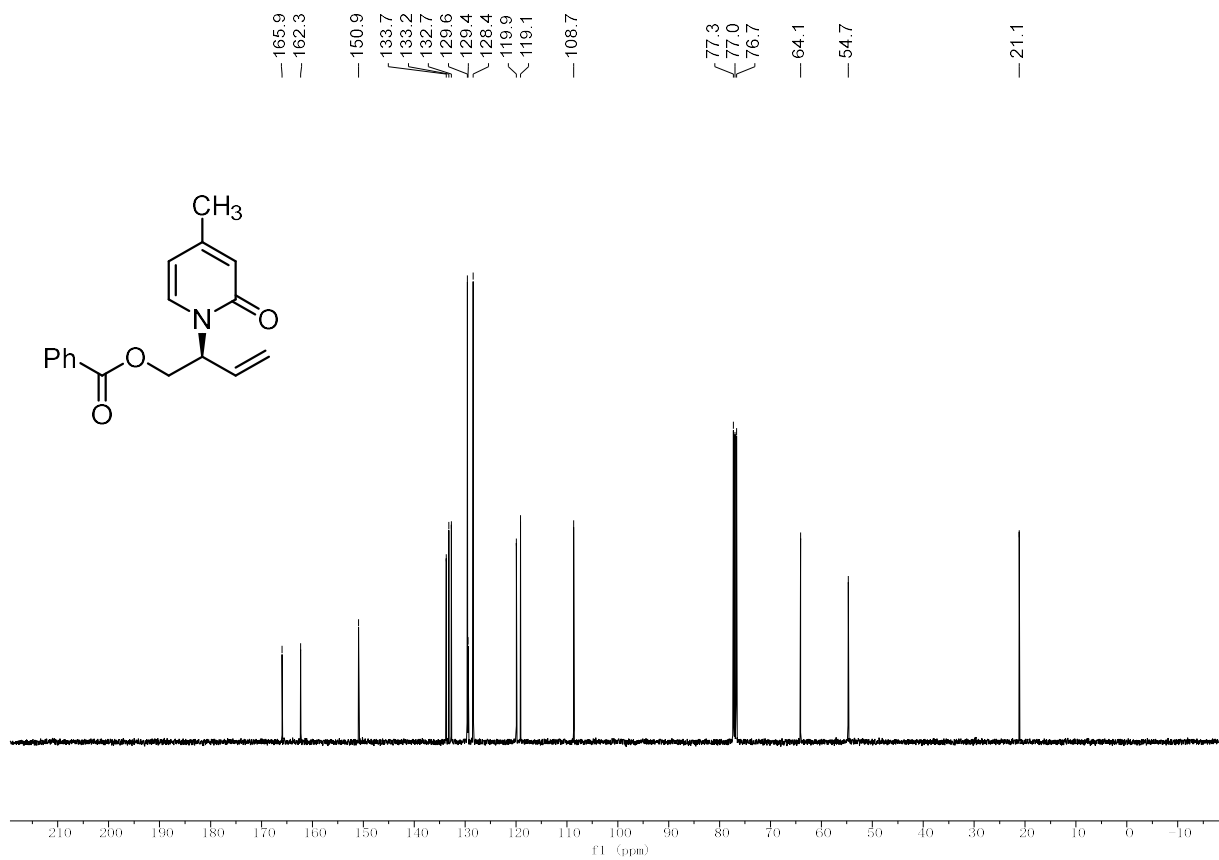

**<sup>13</sup>C NMR (101 MHz, CDCl<sub>3</sub>) of 3c**

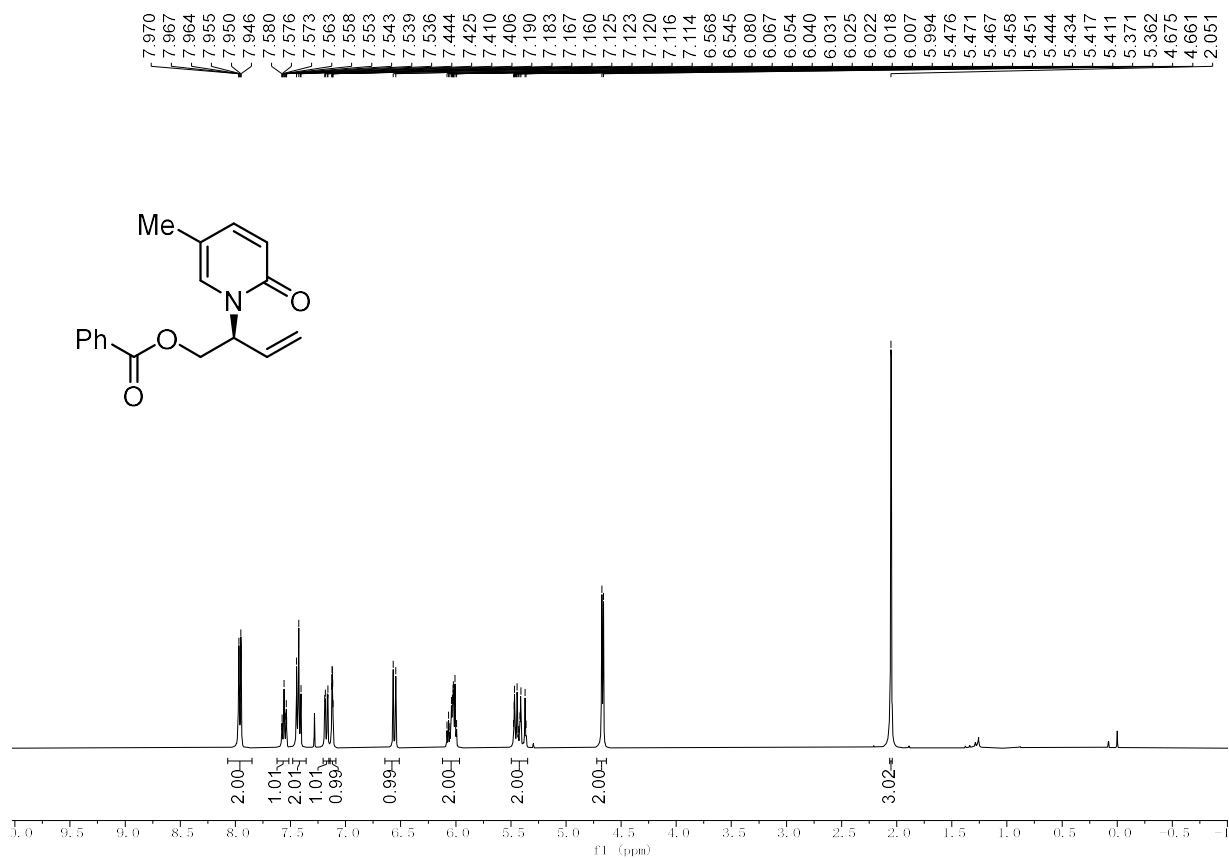

<sup>1</sup>H NMR (400 MHz, CDCl<sub>3</sub>) of 3d

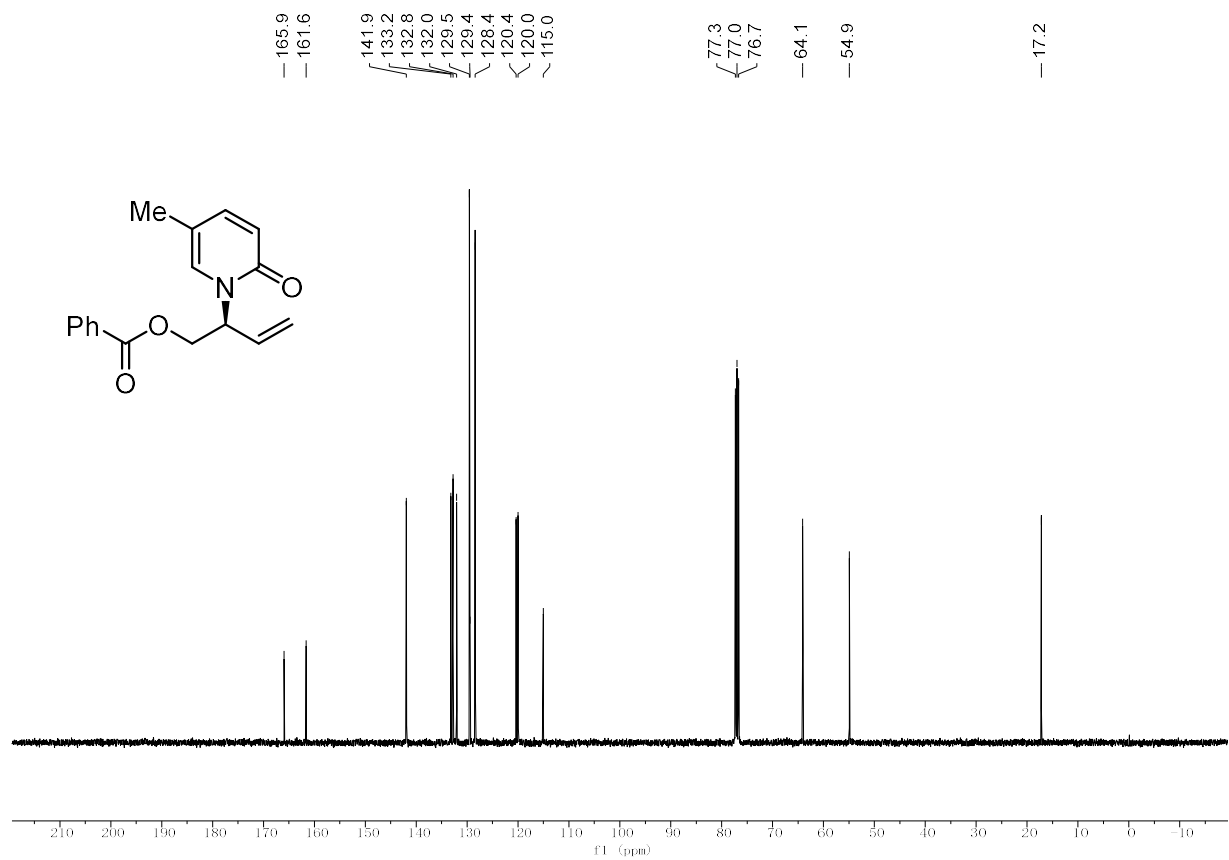

<sup>13</sup>C NMR (101 MHz, CDCl<sub>3</sub>) of 3d



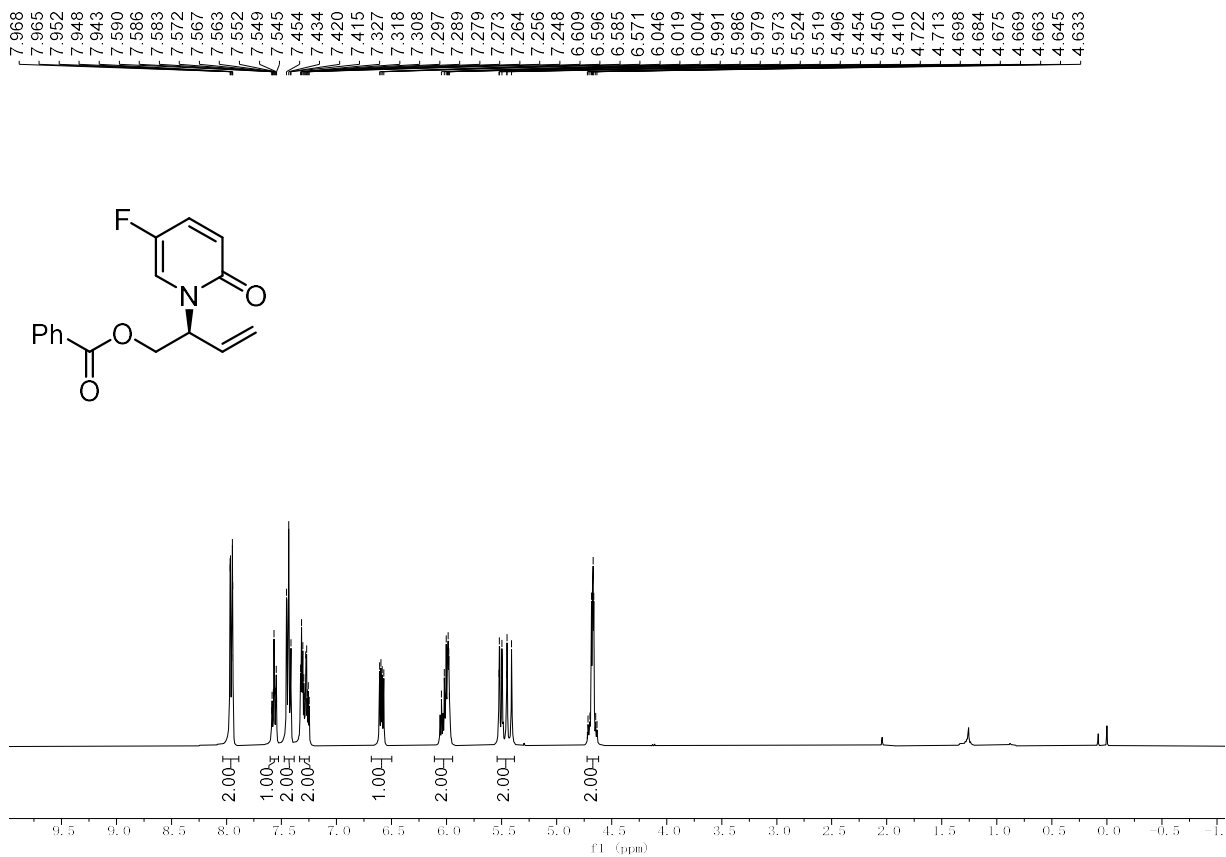

**<sup>1</sup>H NMR (400 MHz, CDCl<sub>3</sub>) of 3e**

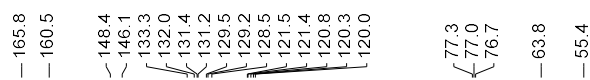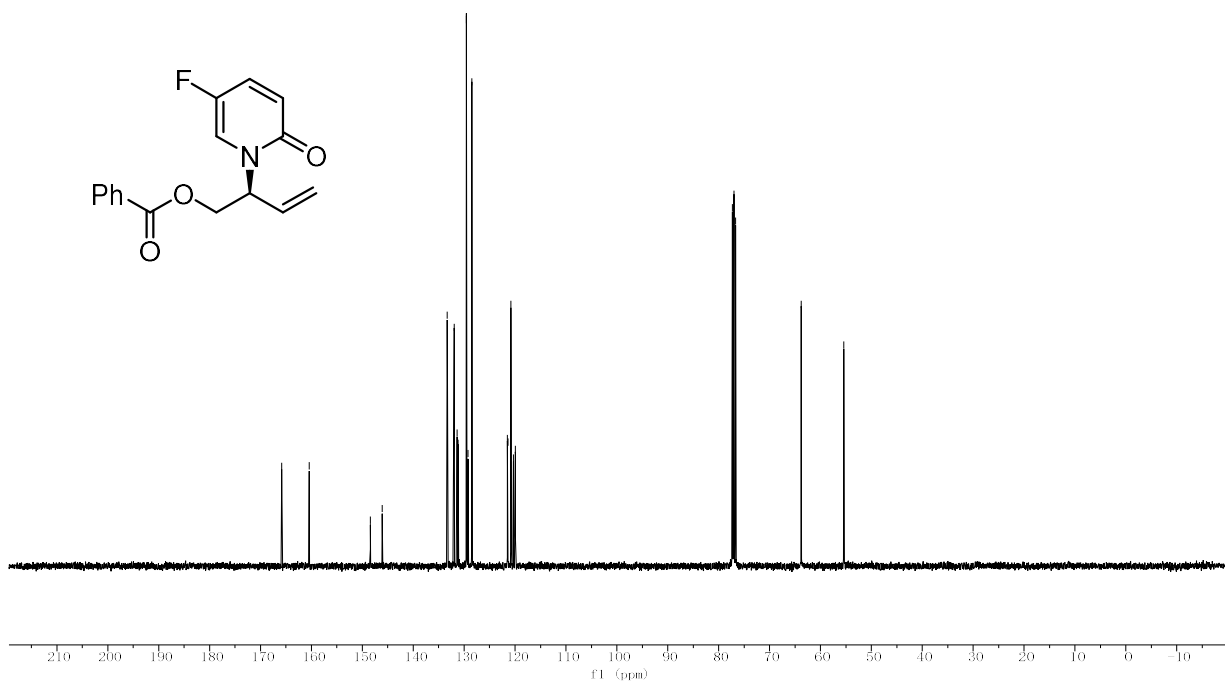

**<sup>13</sup>C NMR (101 MHz, CDCl<sub>3</sub>) of 3e**

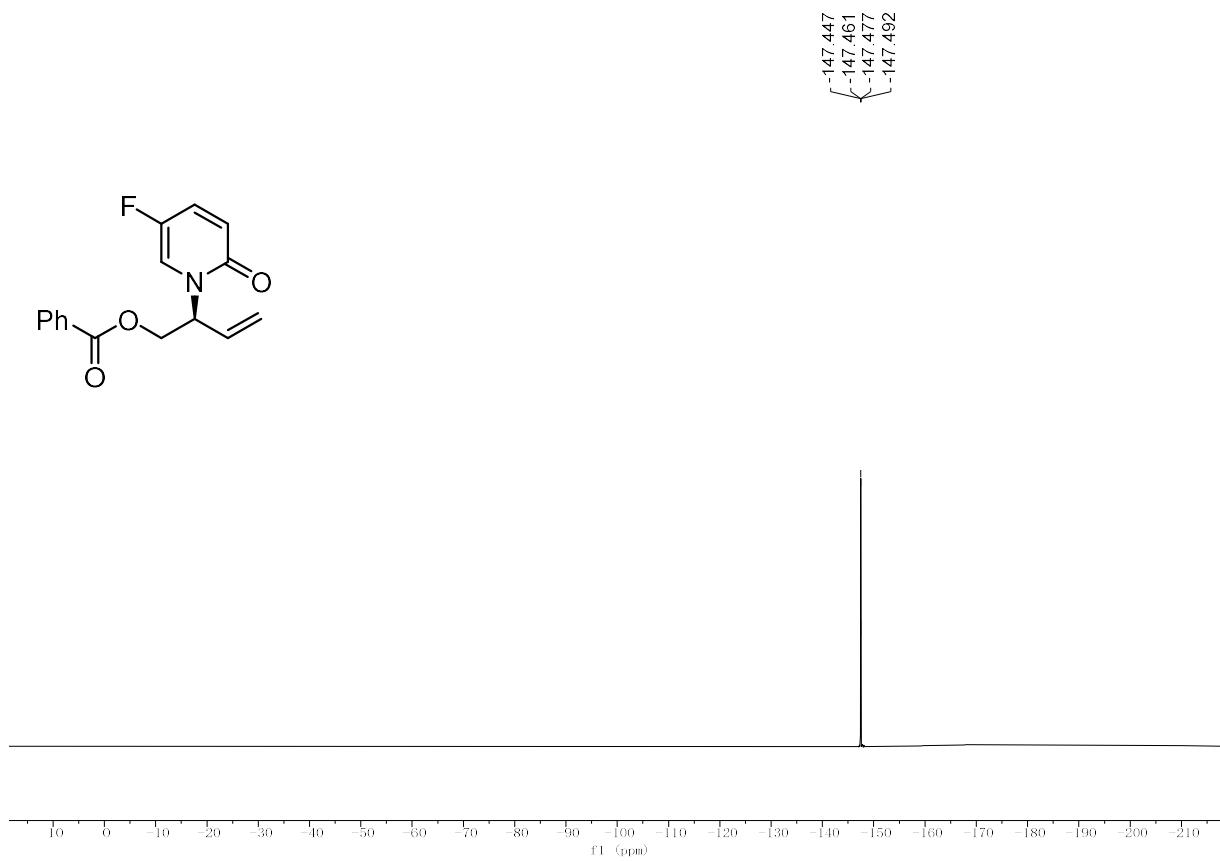

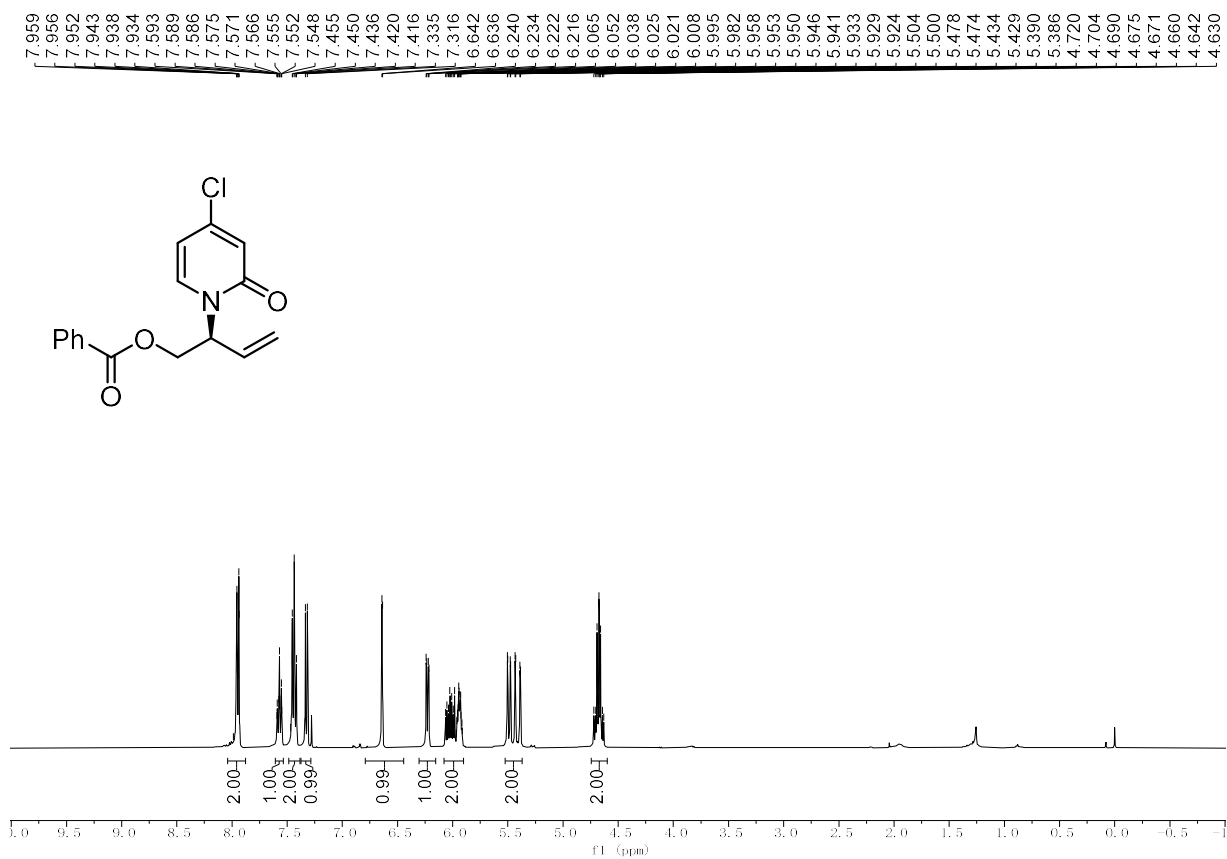

**$^1\text{H}$  NMR (400 MHz,  $\text{CDCl}_3$ ) of **3f****

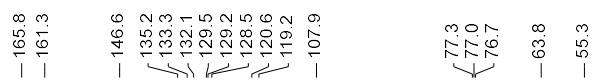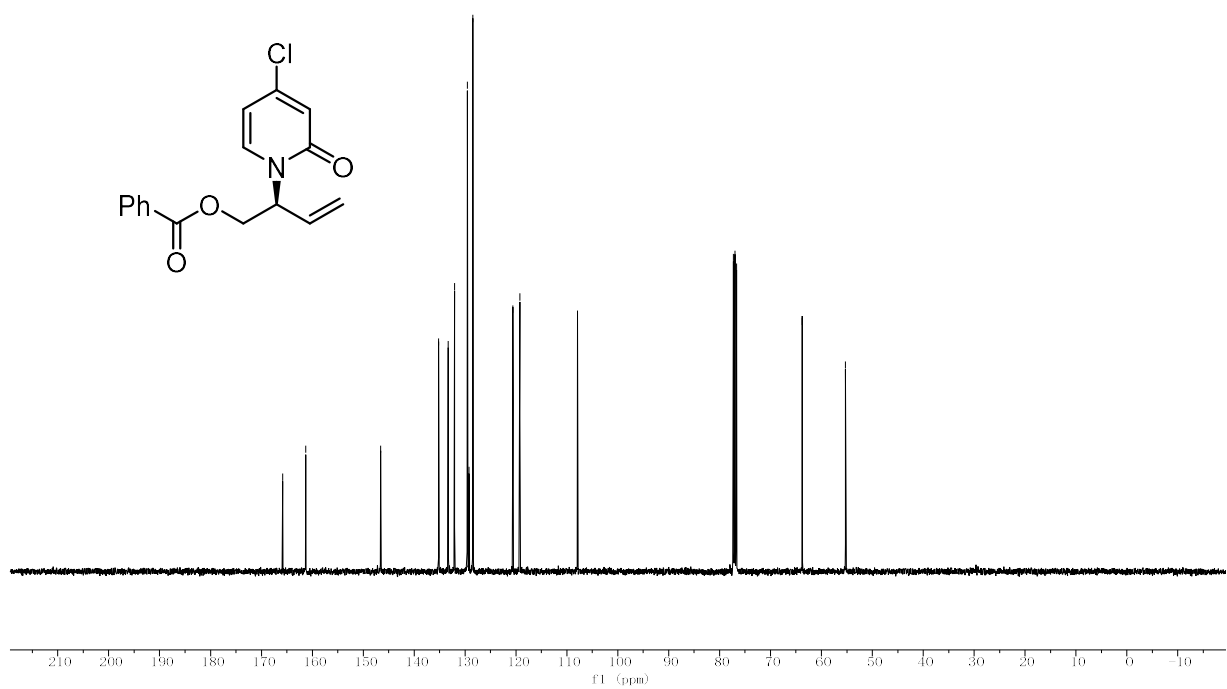

**$^{13}\text{C}$  NMR (101 MHz,  $\text{CDCl}_3$ ) of **3f****

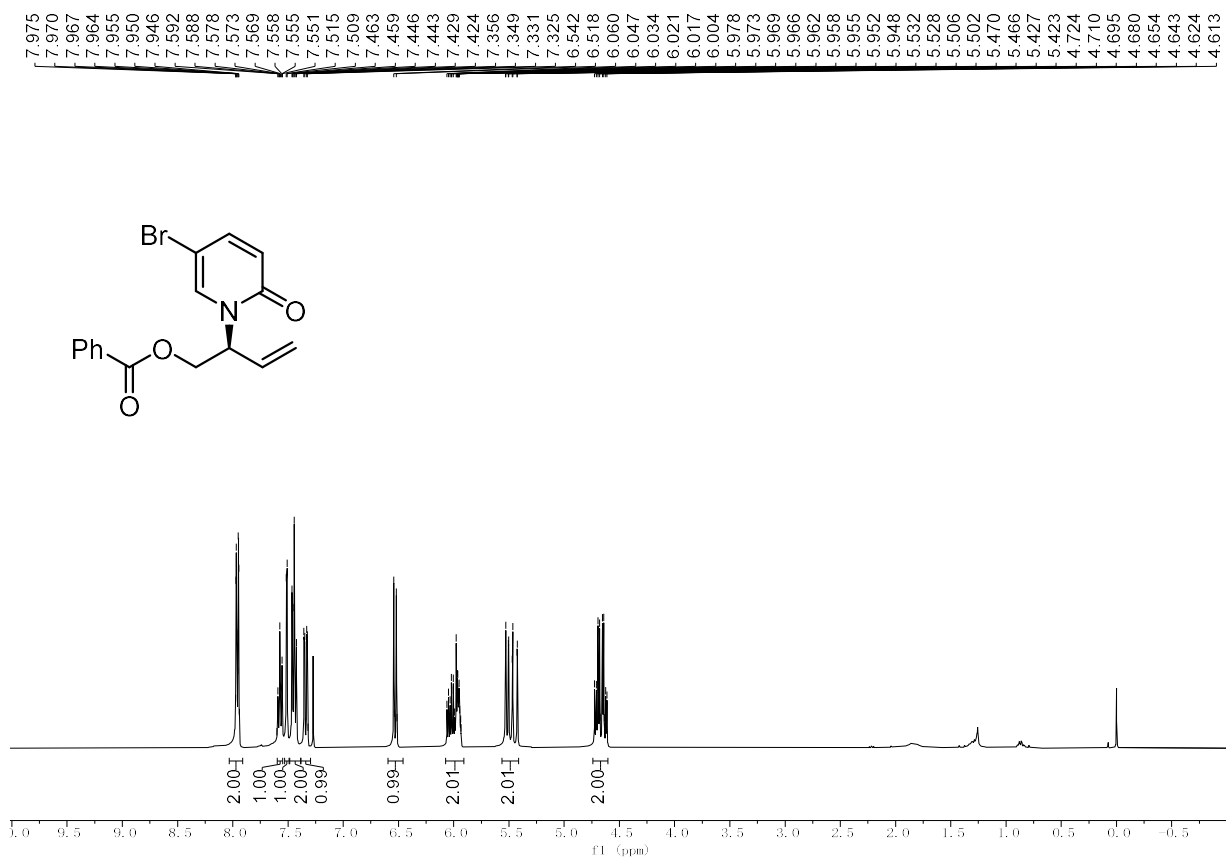

<sup>1</sup>H NMR (400 MHz, CDCl<sub>3</sub>) of **3g**

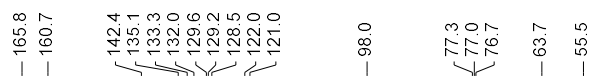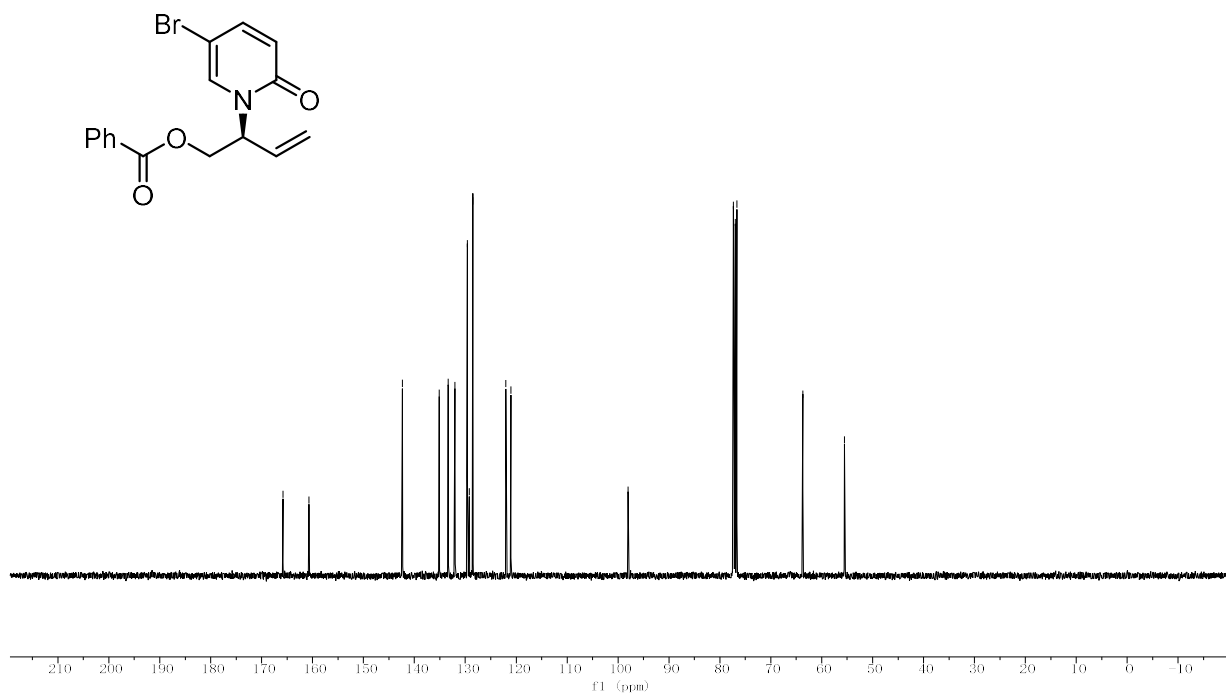

<sup>13</sup>C NMR (101 MHz, CDCl<sub>3</sub>) of **3g**

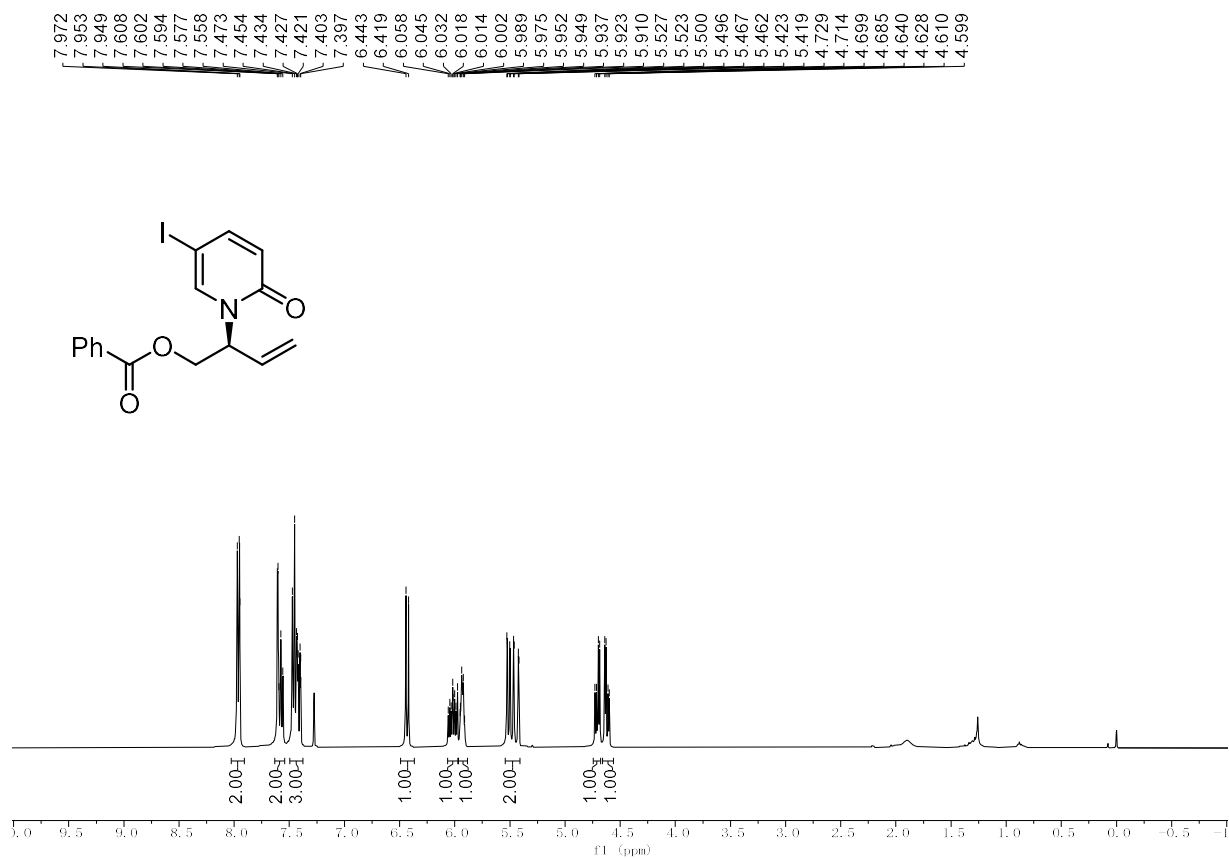

**<sup>1</sup>H NMR (400 MHz, CDCl<sub>3</sub>) of 3h**

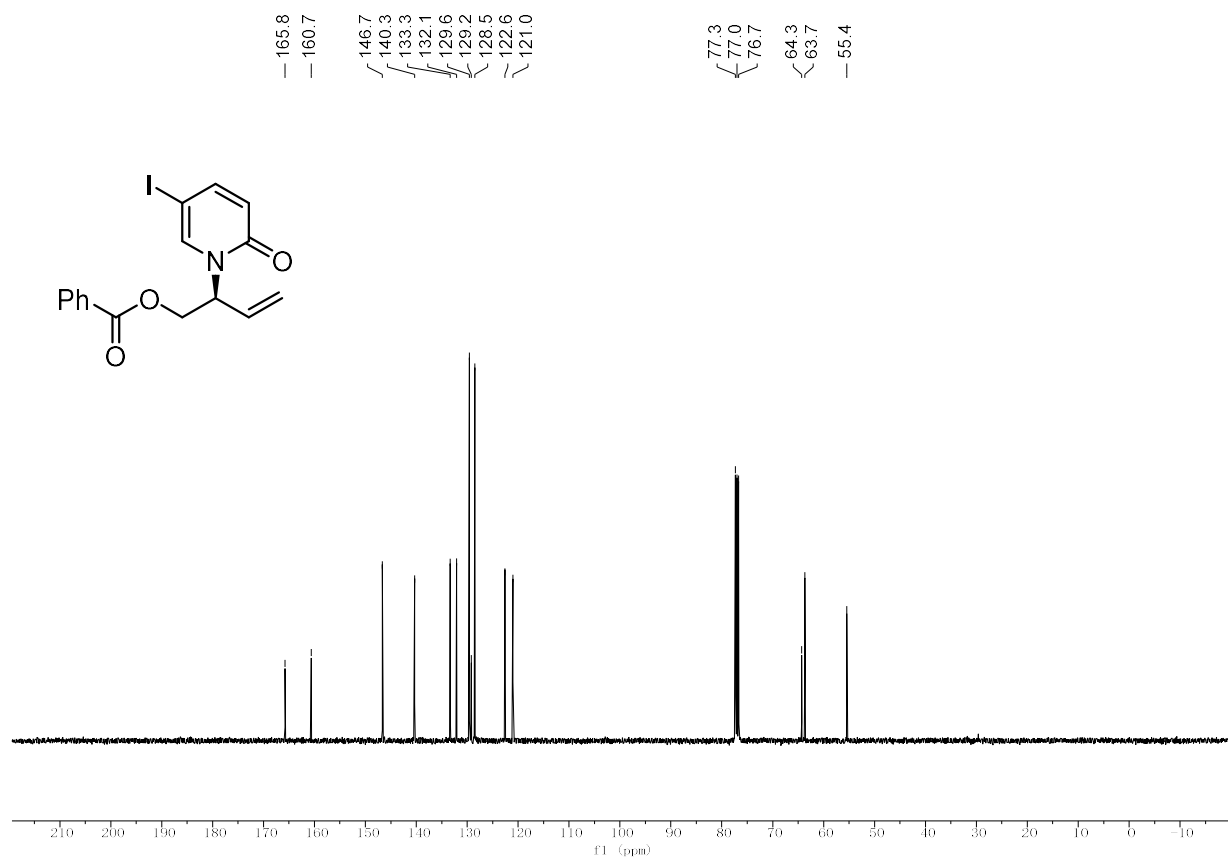

**<sup>13</sup>C NMR (101 MHz, CDCl<sub>3</sub>) of 3h**

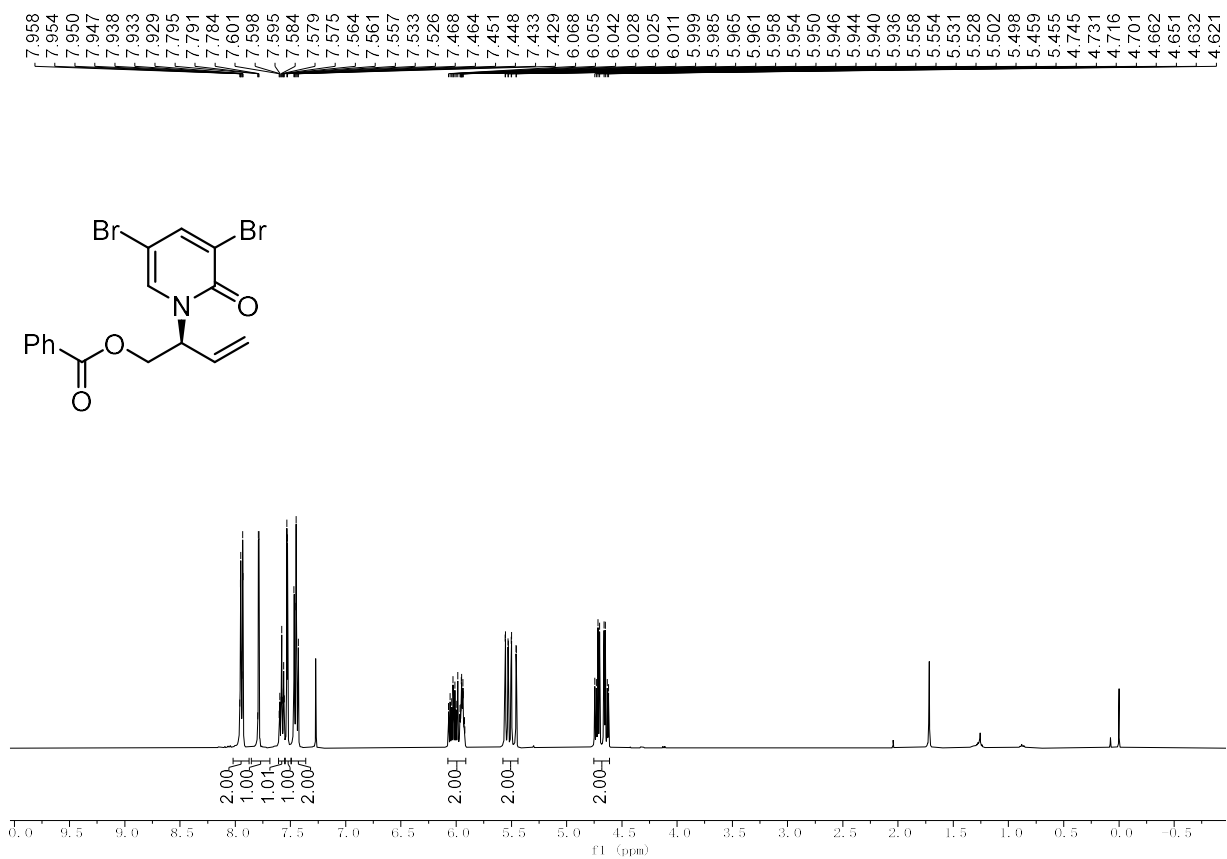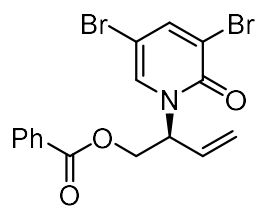

**<sup>1</sup>H NMR (400 MHz, CDCl<sub>3</sub>) of 3i**

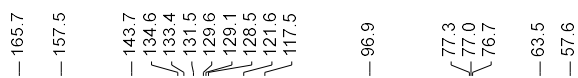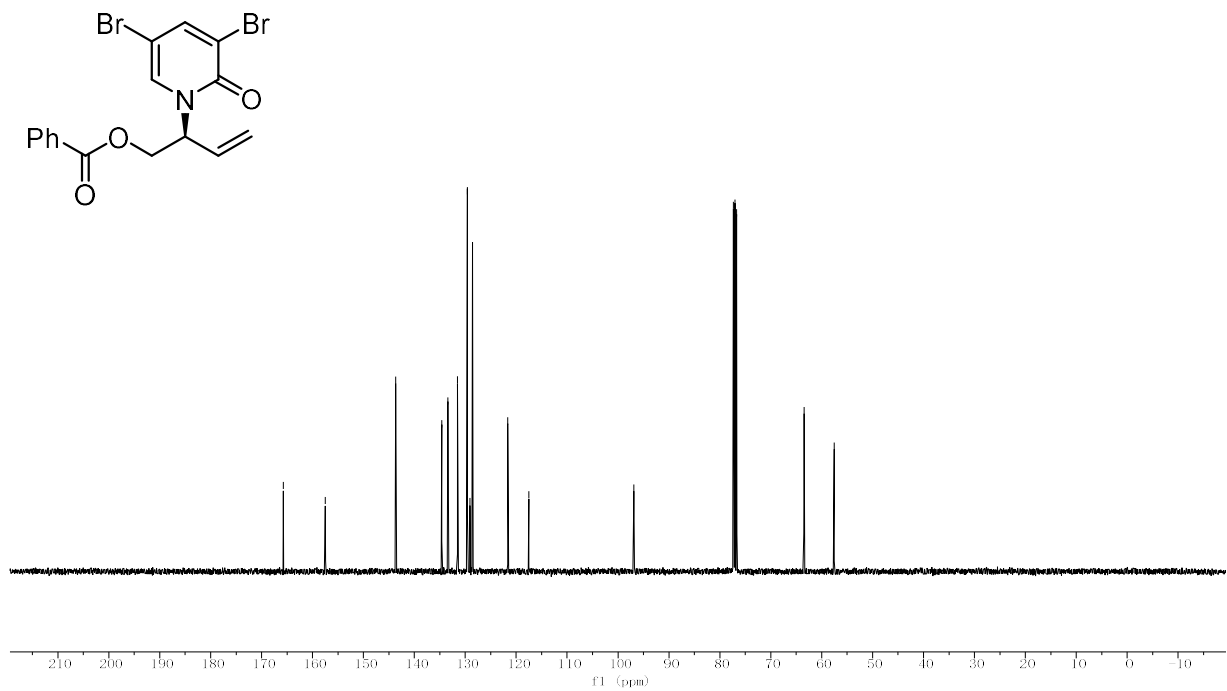

**<sup>13</sup>C NMR (101 MHz, CDCl<sub>3</sub>) of 3i**

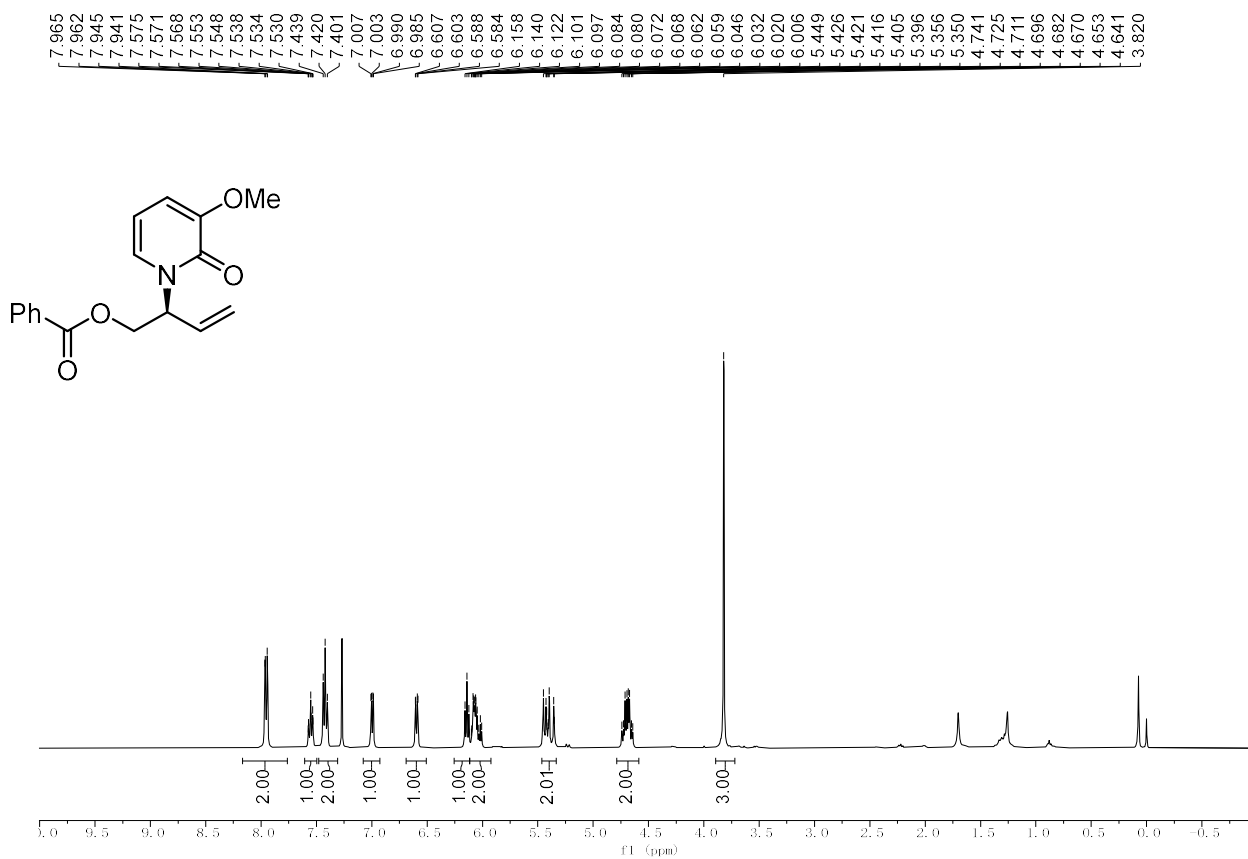

**<sup>1</sup>H NMR (400 MHz, CDCl<sub>3</sub>) of 3j**

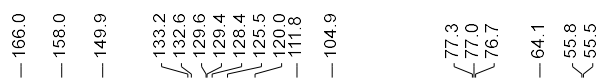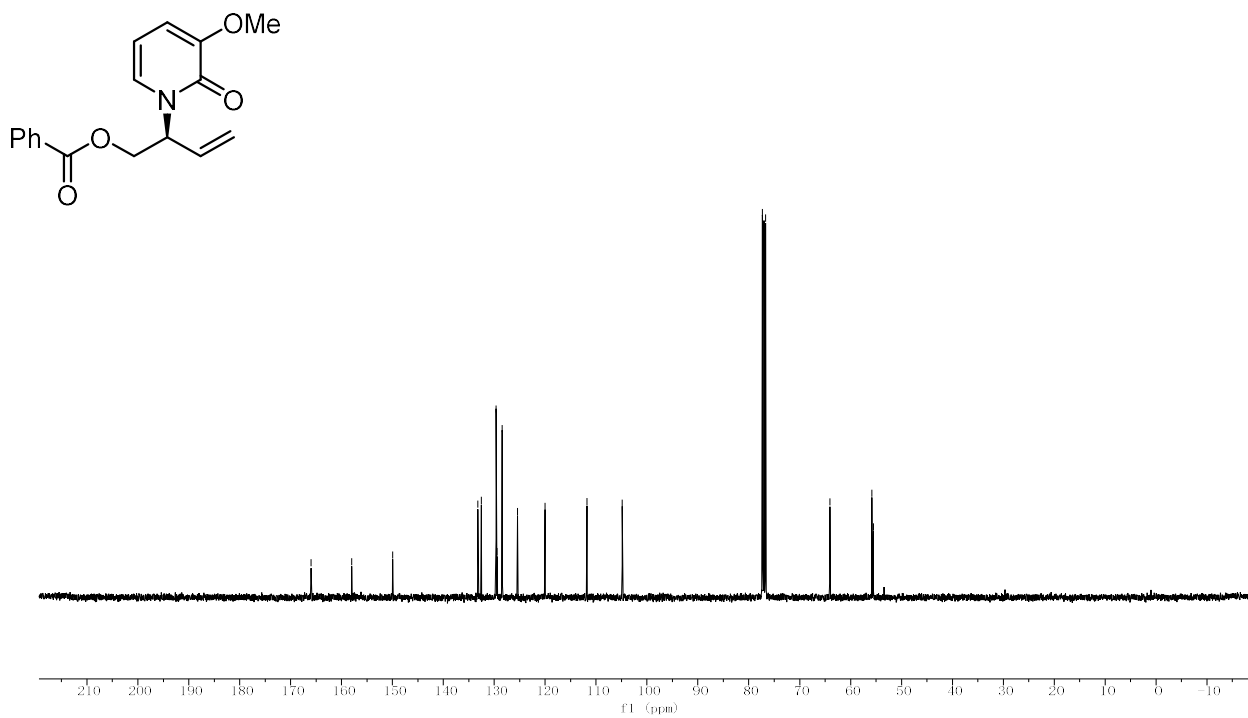

**<sup>13</sup>C NMR (101 MHz, CDCl<sub>3</sub>) of 3j**

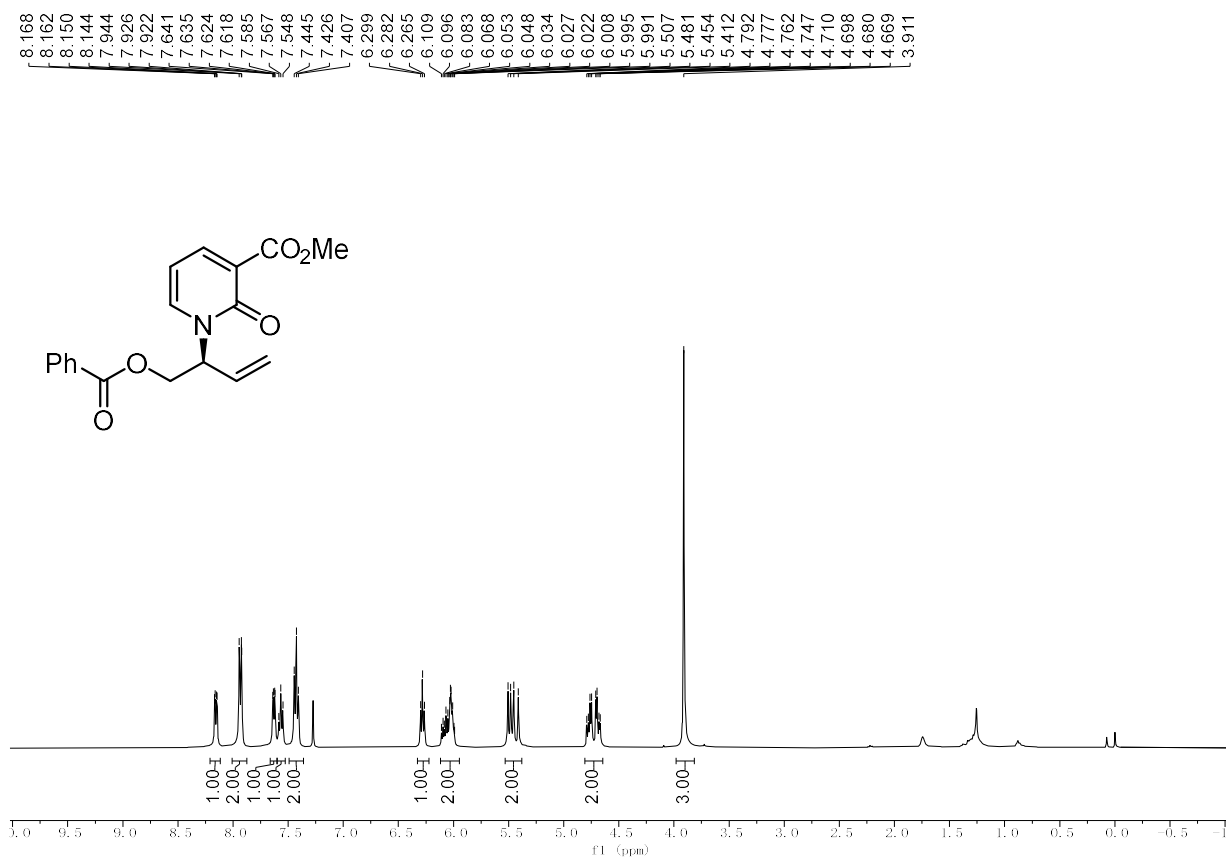

**<sup>1</sup>H NMR (400 MHz, CDCl<sub>3</sub>) of 3k**

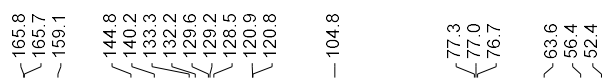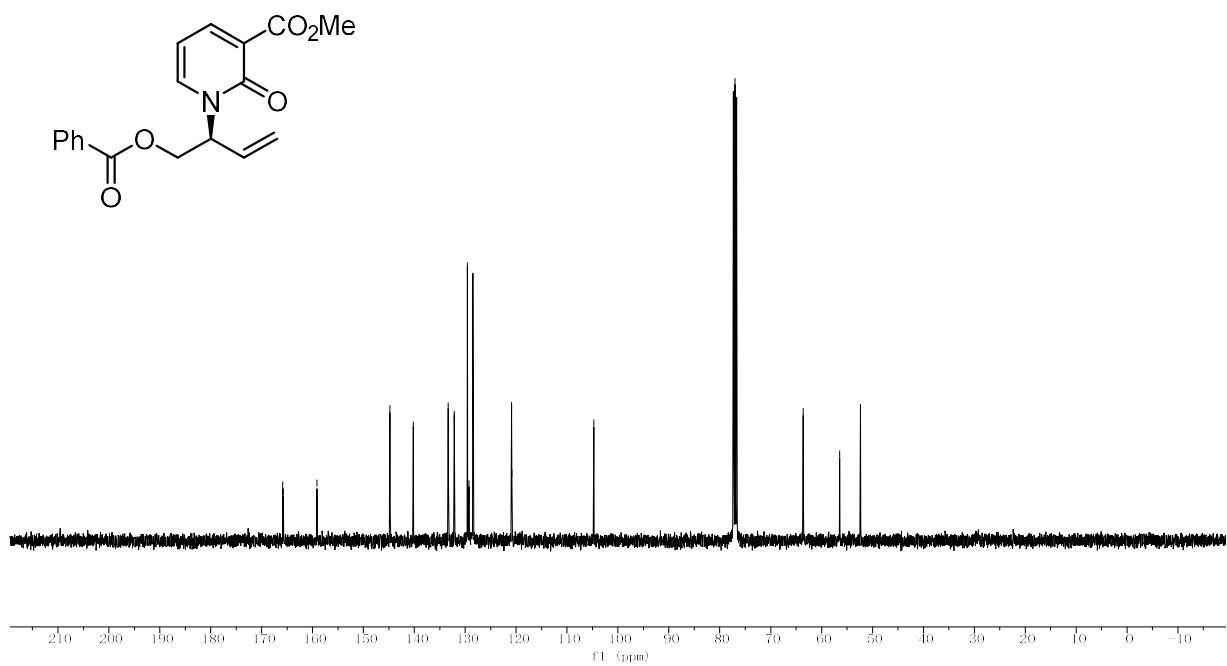

**<sup>13</sup>C NMR (101 MHz, CDCl<sub>3</sub>) of 3k**



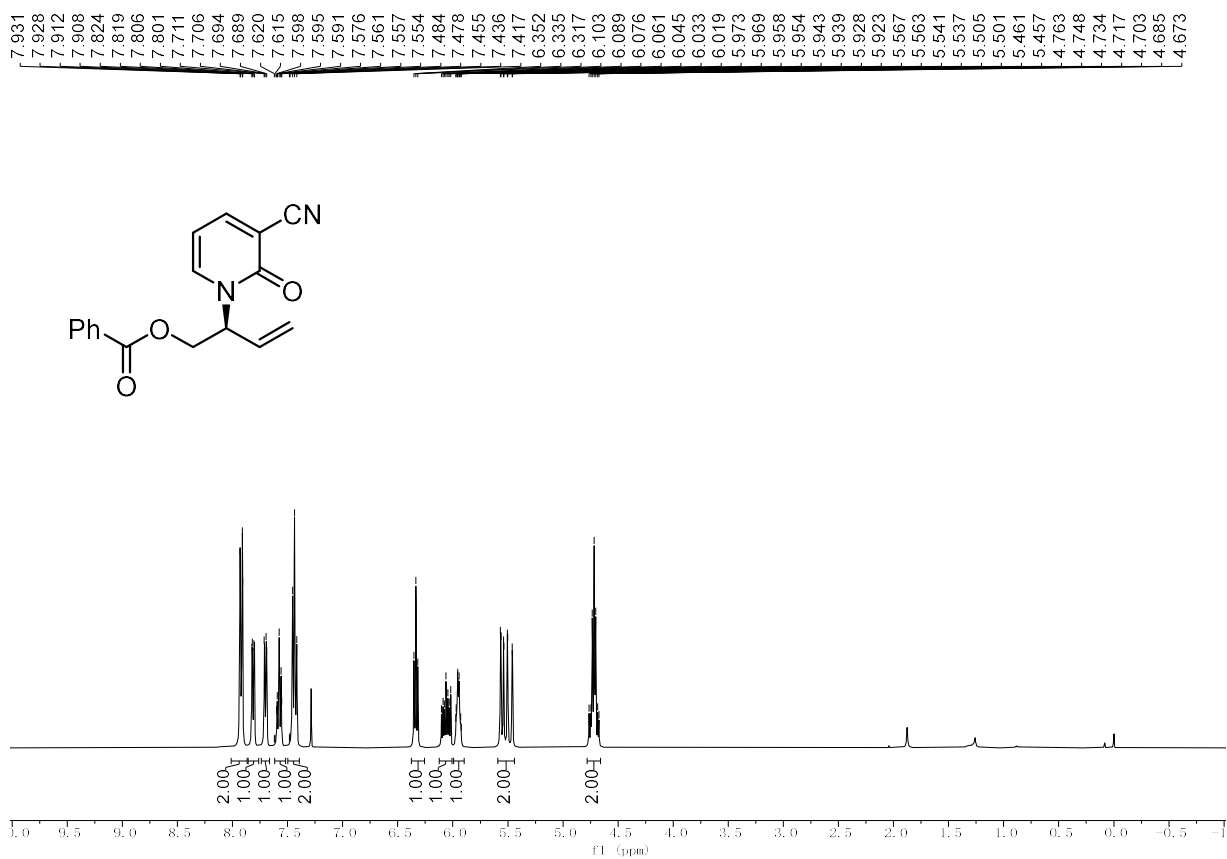

**<sup>1</sup>H NMR (400 MHz, CDCl<sub>3</sub>) of 31**

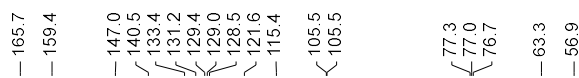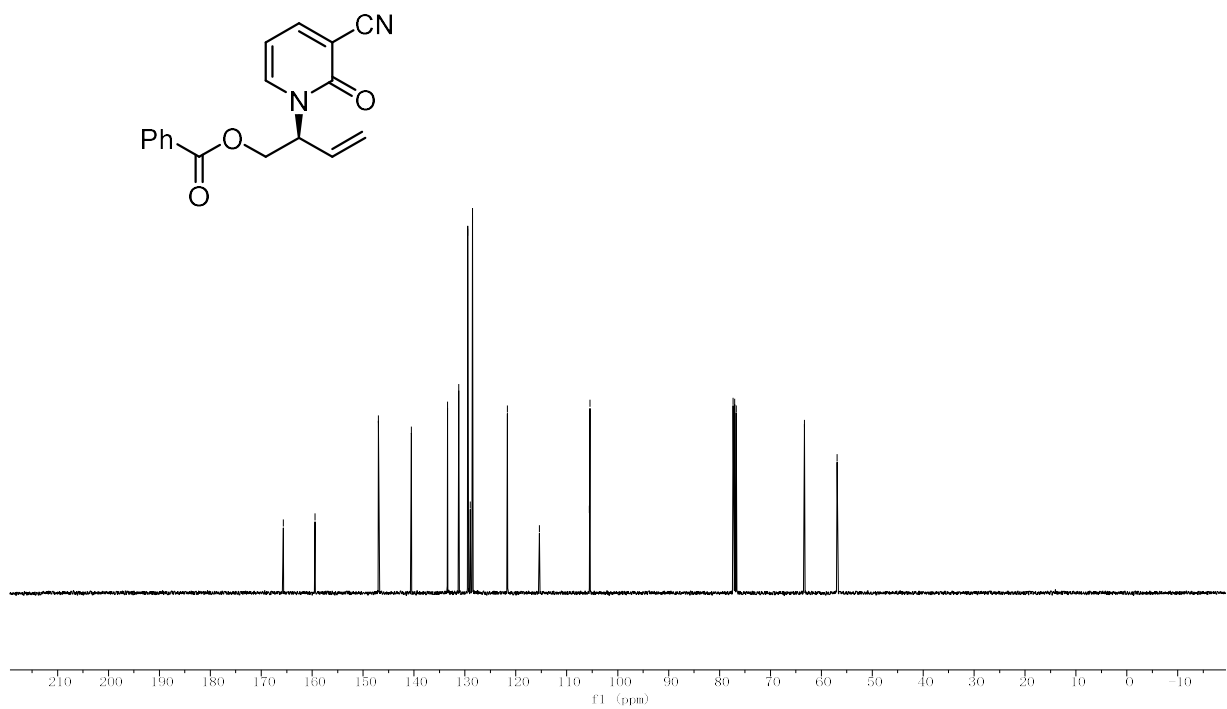

**<sup>13</sup>C NMR (101 MHz, CDCl<sub>3</sub>) of 31**

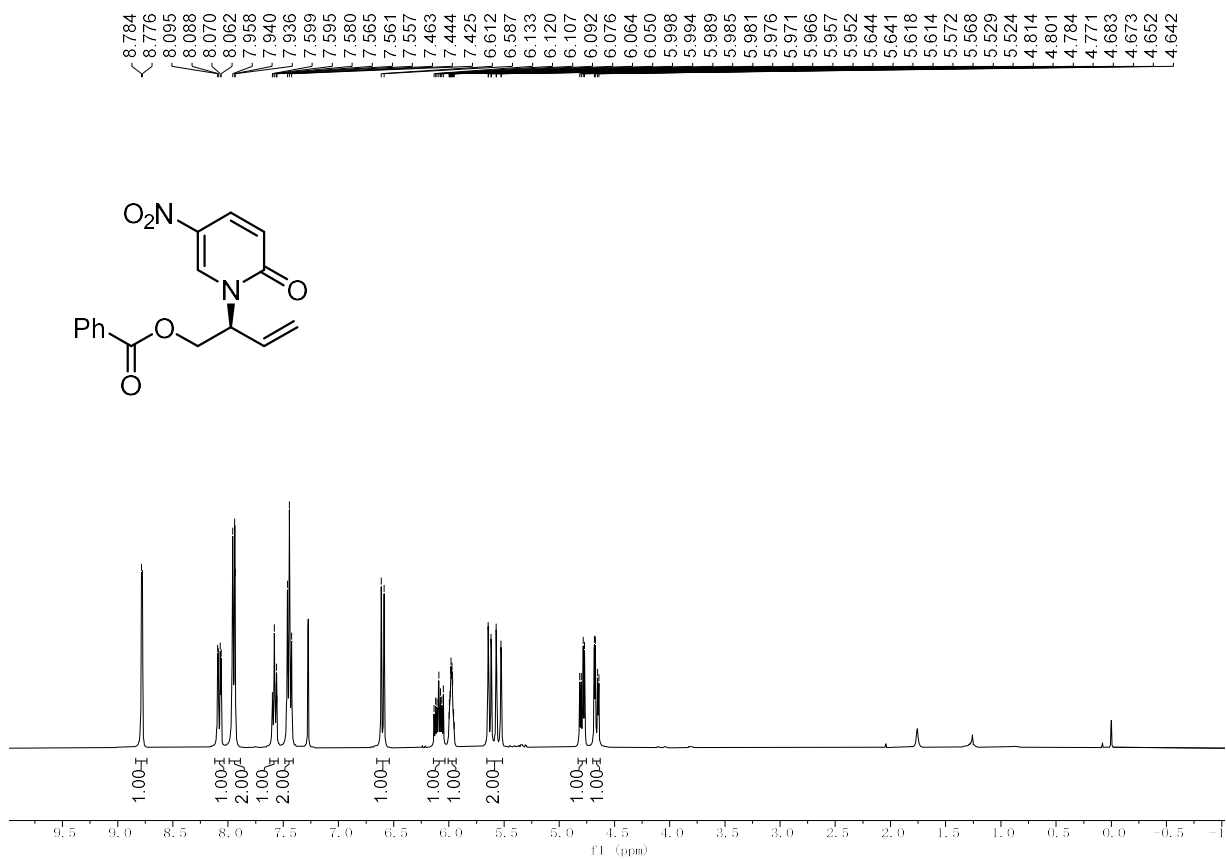

**<sup>1</sup>H NMR (400 MHz, CDCl<sub>3</sub>) of 3m**

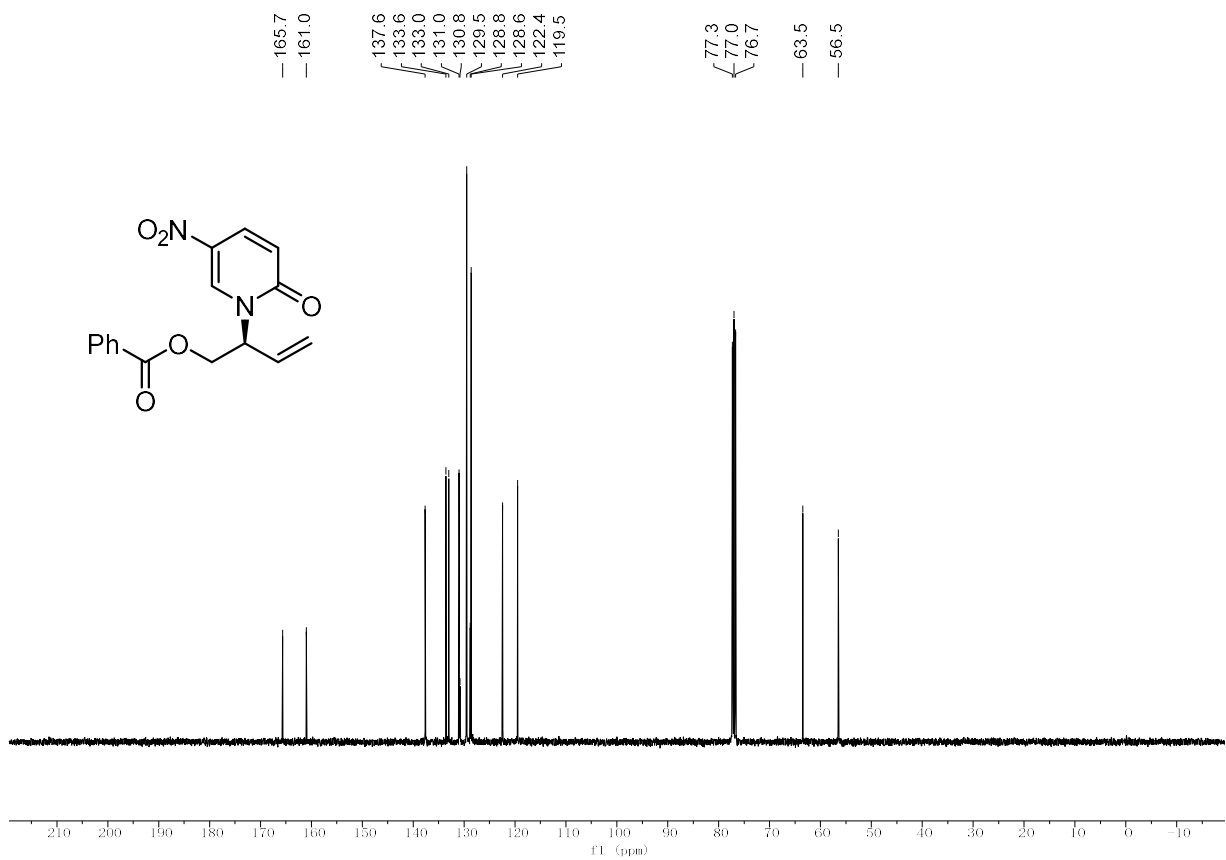

**<sup>13</sup>C NMR (101 MHz, CDCl<sub>3</sub>) of 3m**

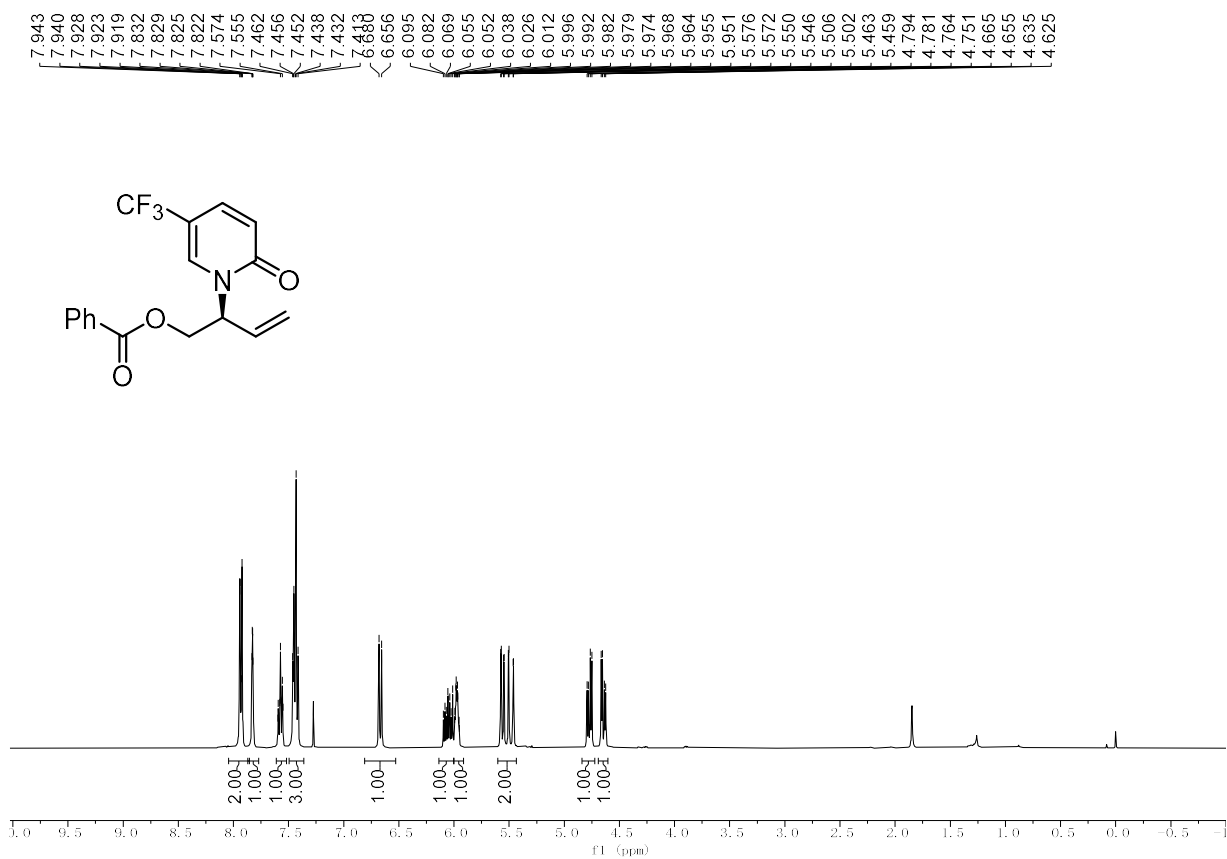

**$^1\text{H}$  NMR (400 MHz,  $\text{CDCl}_3$ ) of **3n****

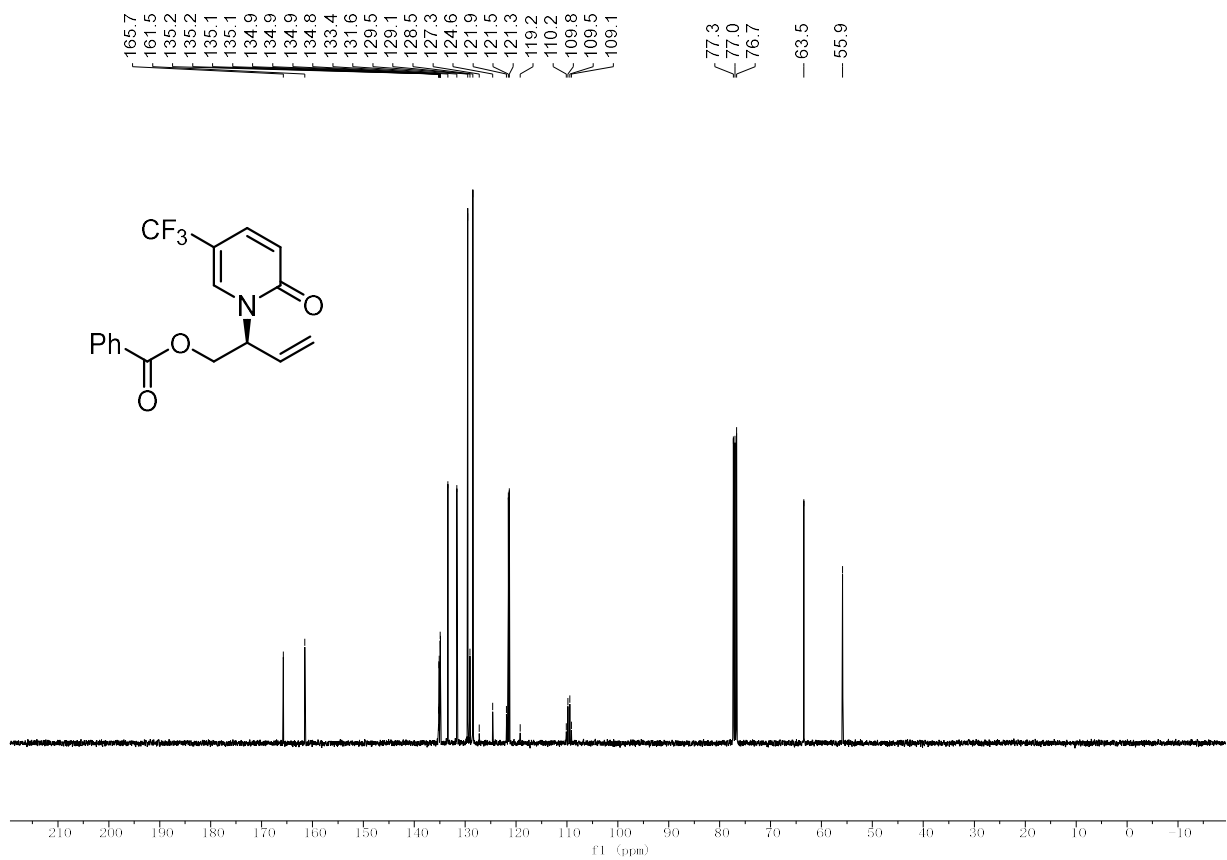

**$^{13}\text{C}$  NMR (101 MHz,  $\text{CDCl}_3$ ) of **3n****

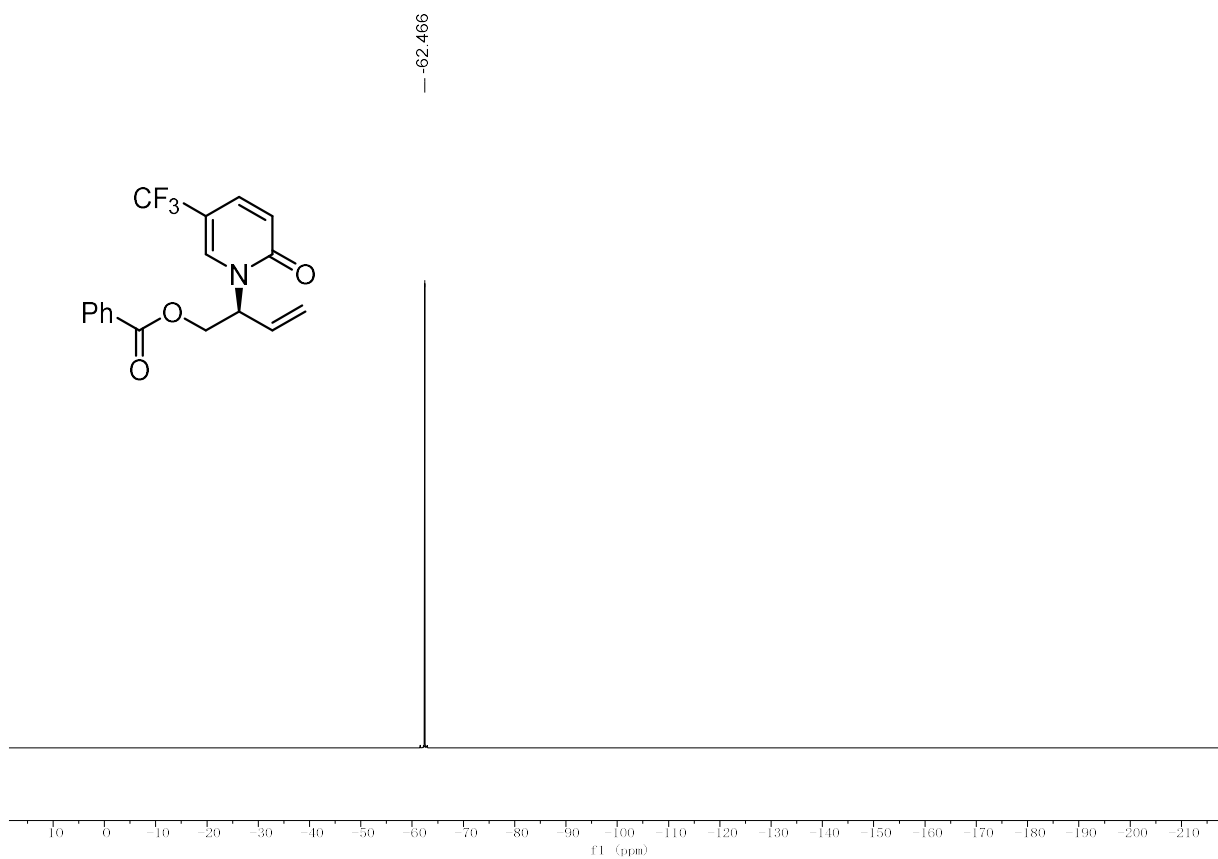

**$^{19}\text{F}$  NMR (376 MHz,  $\text{CDCl}_3$ ) of **3n****

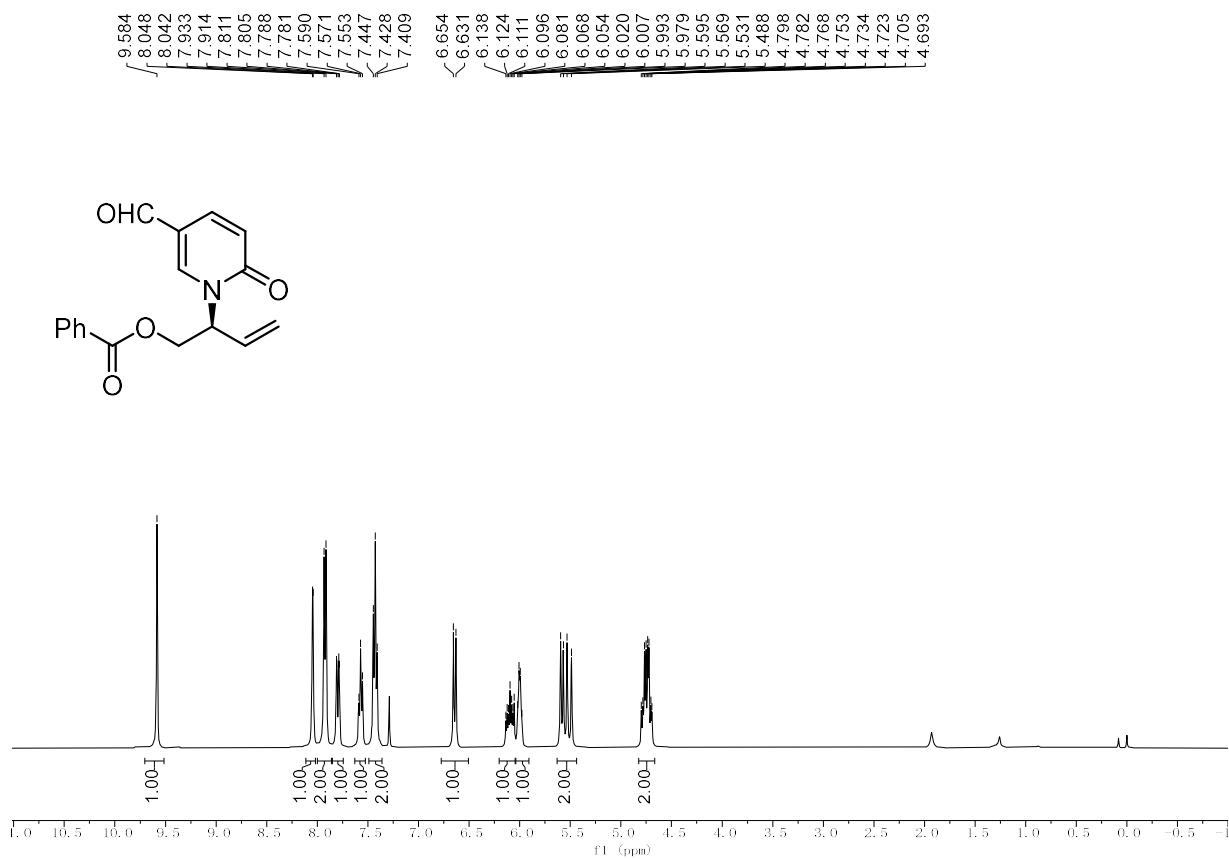

**<sup>1</sup>H NMR (400 MHz, CDCl<sub>3</sub>) of 3o**

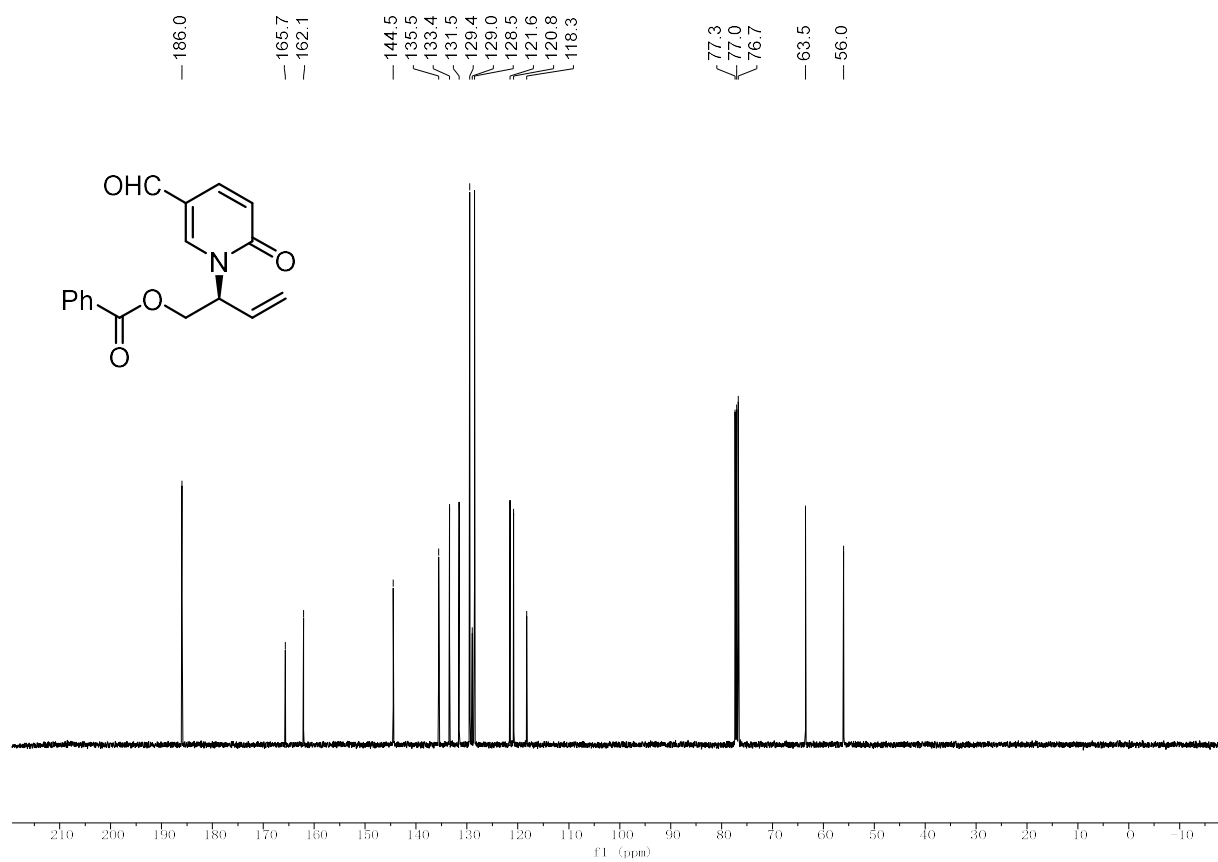

**<sup>13</sup>C NMR (101 MHz, CDCl<sub>3</sub>) of 3o**

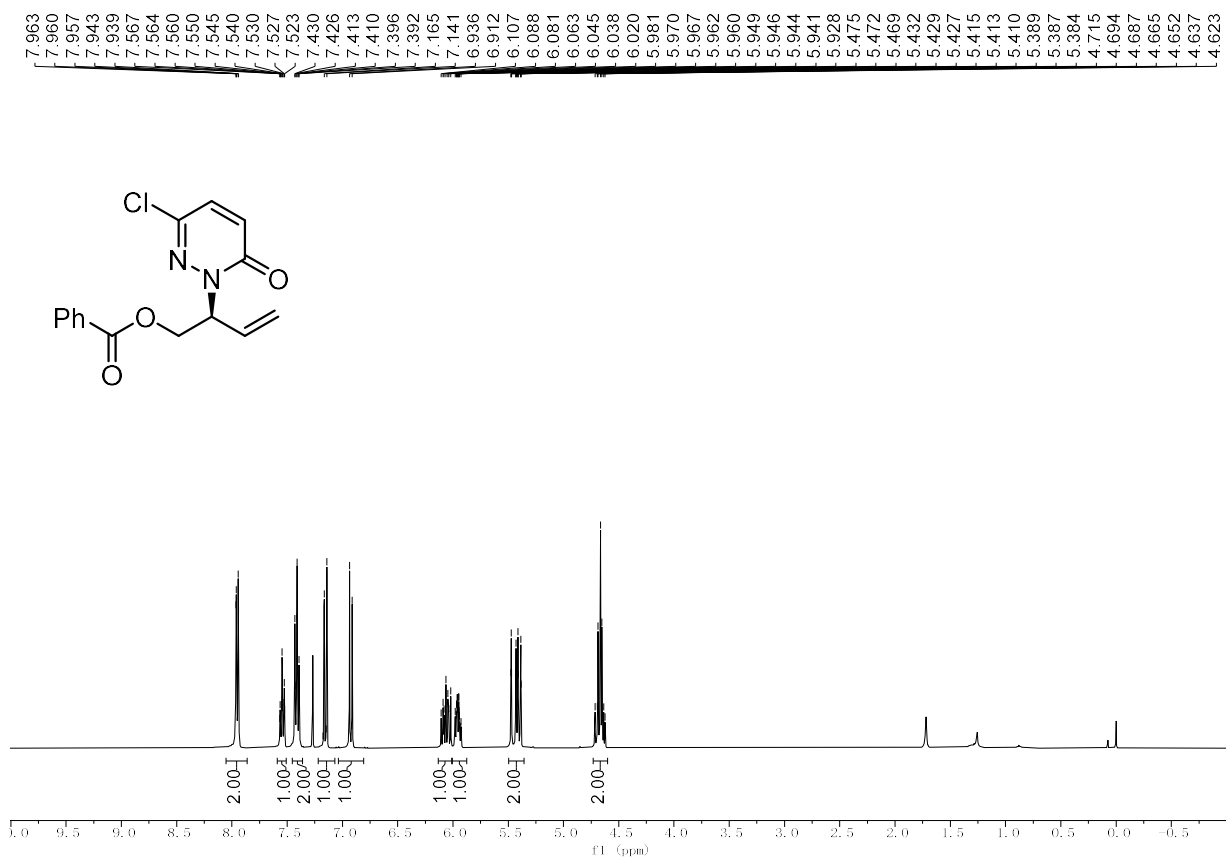

**<sup>1</sup>H NMR (400 MHz, CDCl<sub>3</sub>) of 3p**

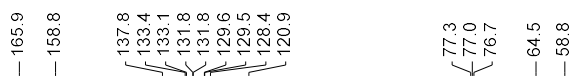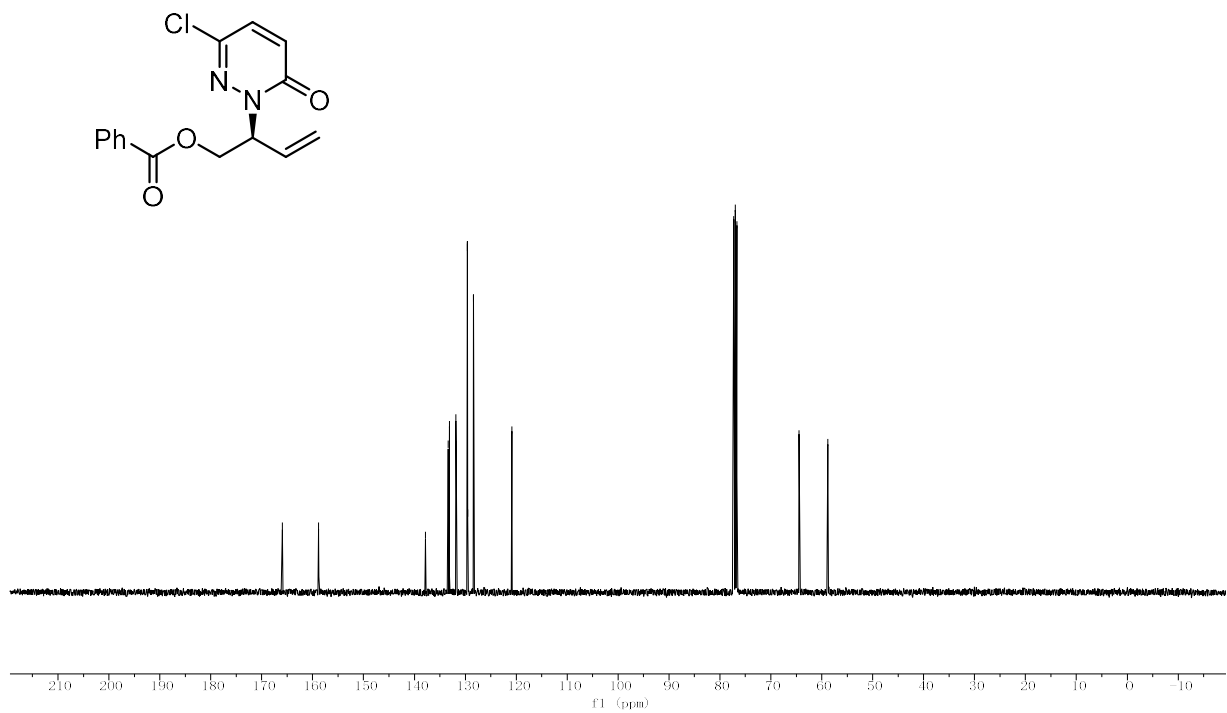

**<sup>13</sup>C NMR (101 MHz, CDCl<sub>3</sub>) of 3p**

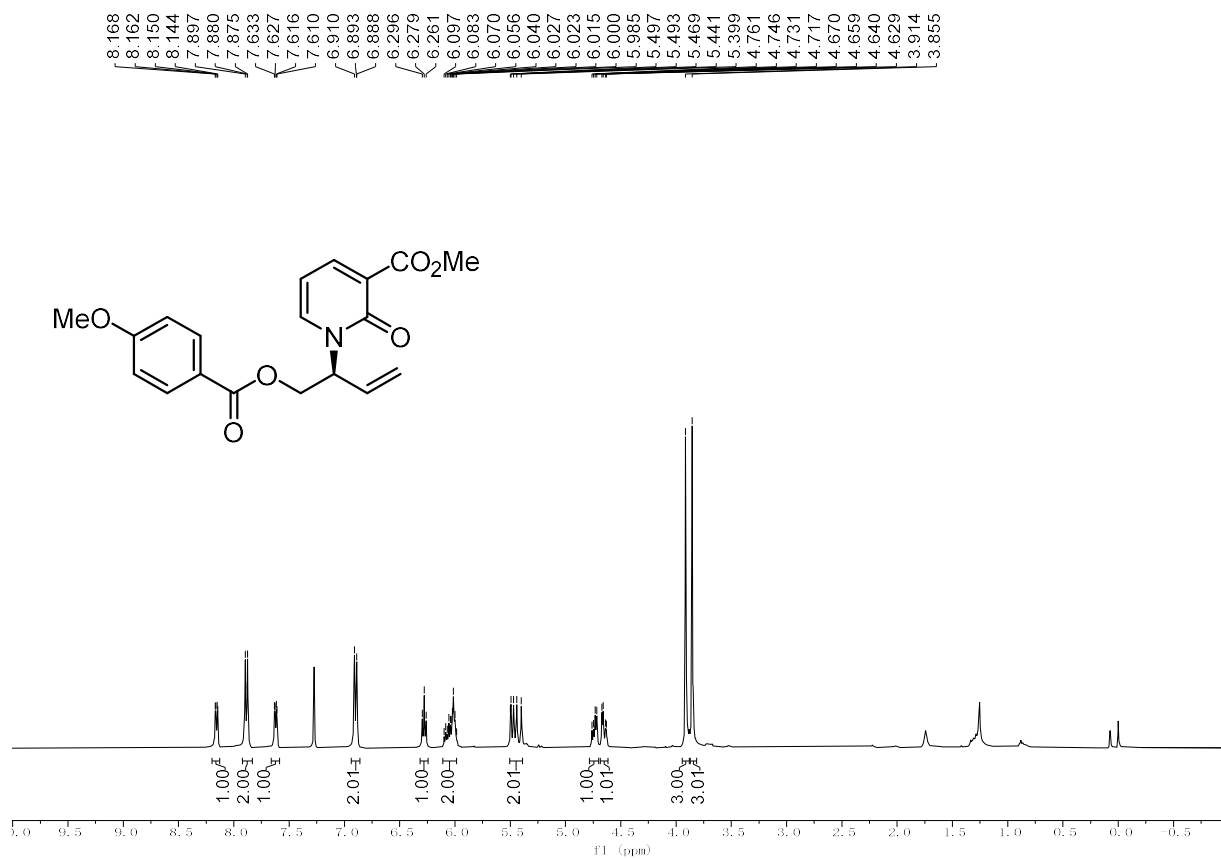

**<sup>1</sup>H NMR (400 MHz, CDCl<sub>3</sub>) of 3q**

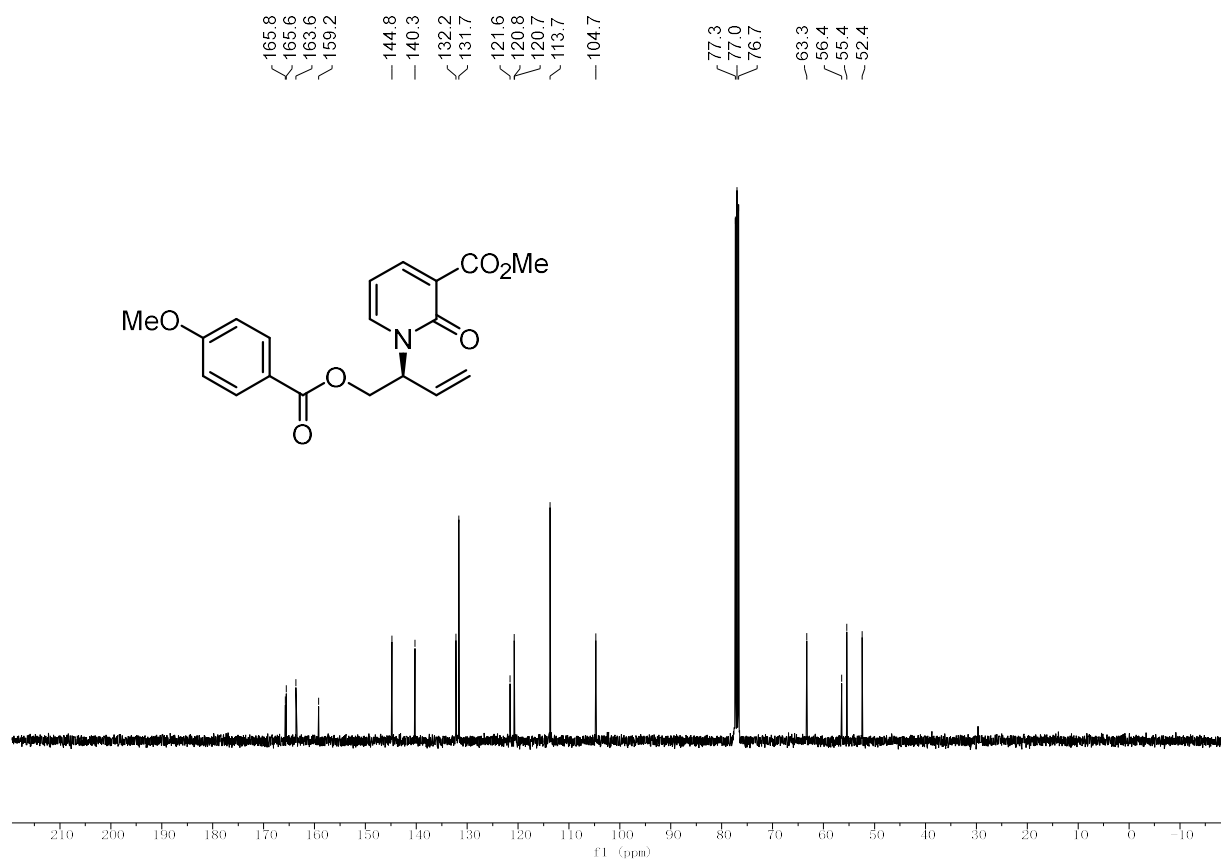

**<sup>13</sup>C NMR (101 MHz, CDCl<sub>3</sub>) of 3q**

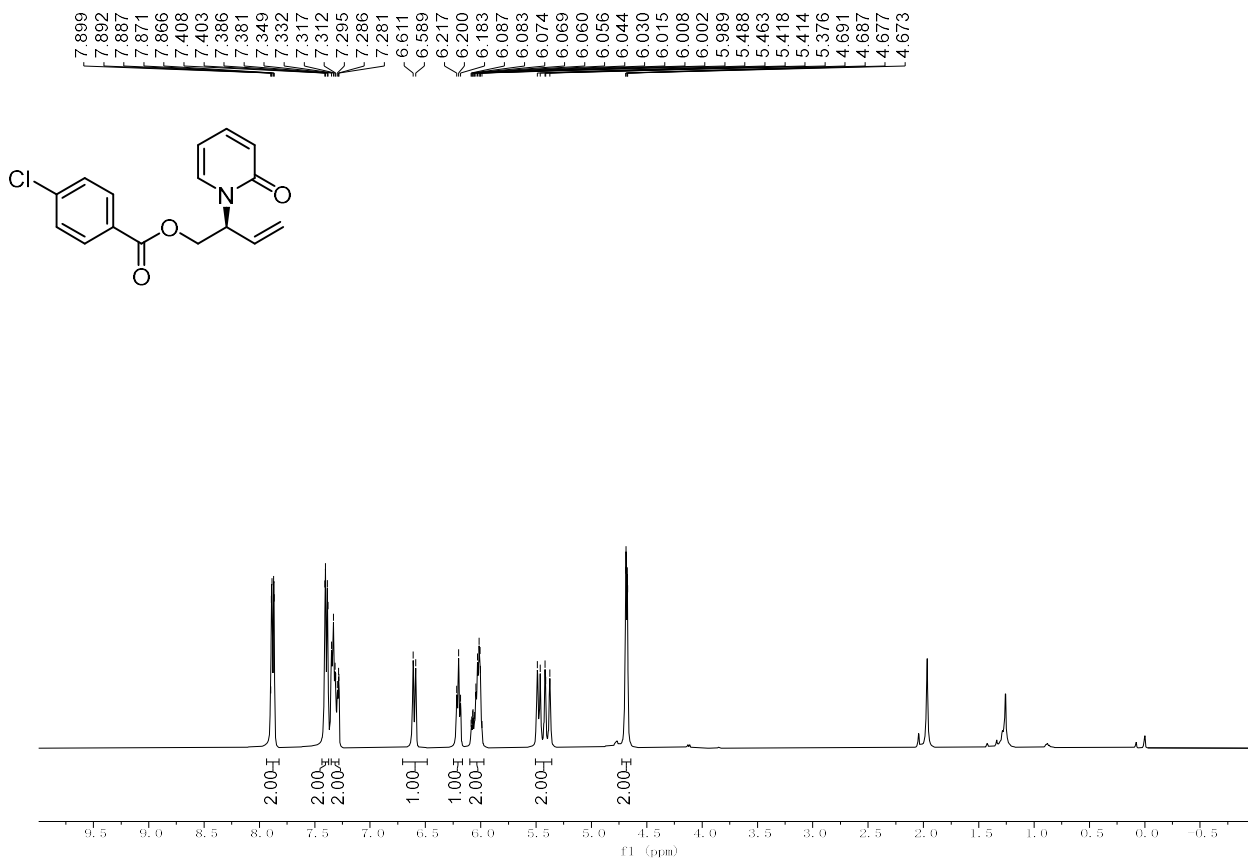

**<sup>1</sup>H NMR (400 MHz, CDCl<sub>3</sub>) of 3r**

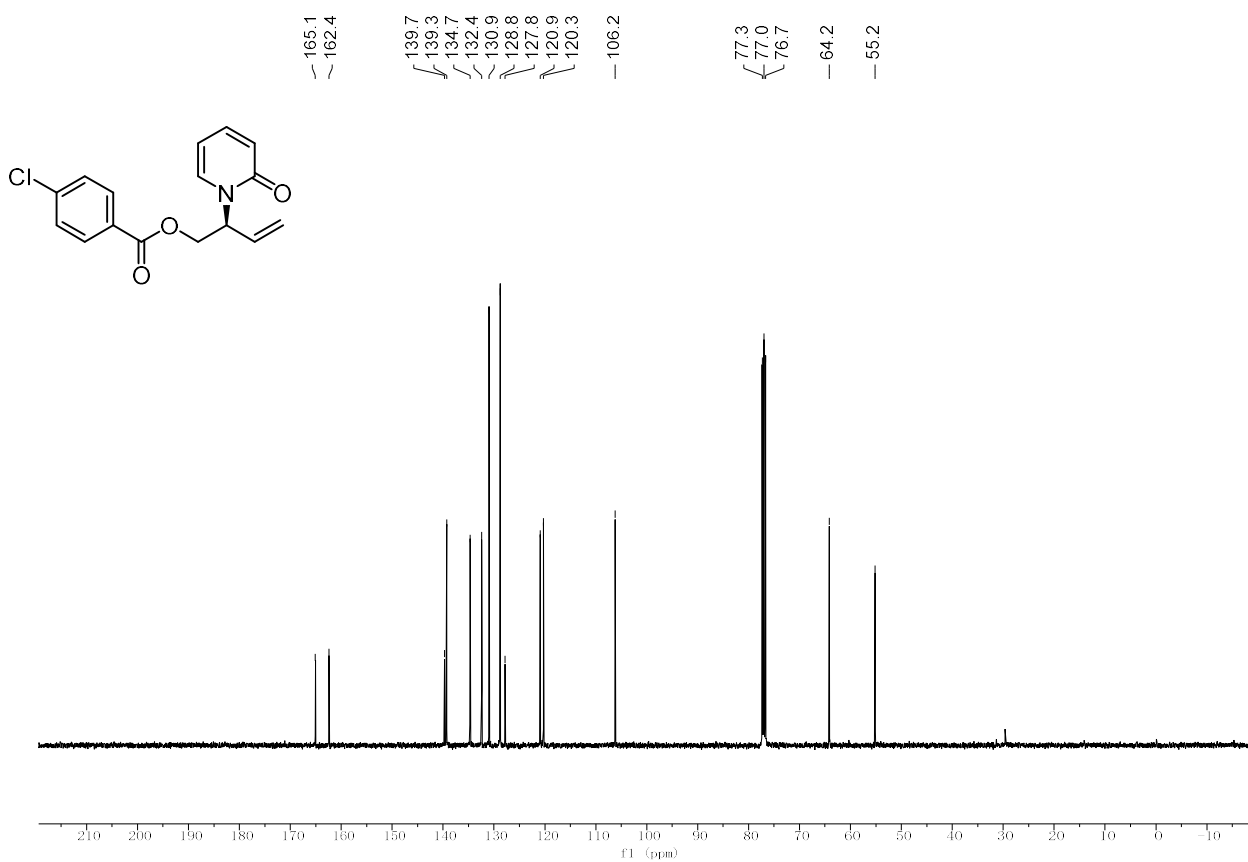

**<sup>13</sup>C NMR (101 MHz, CDCl<sub>3</sub>) of 3r**



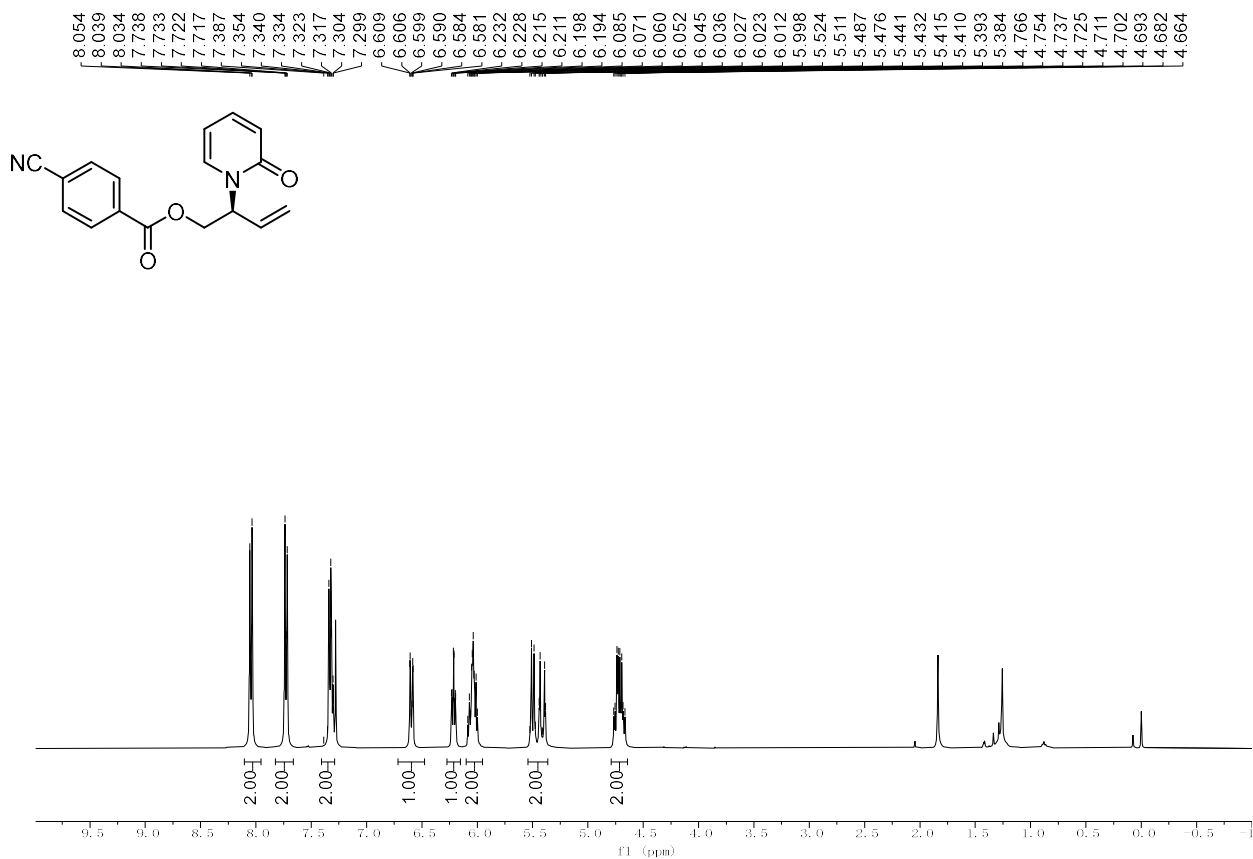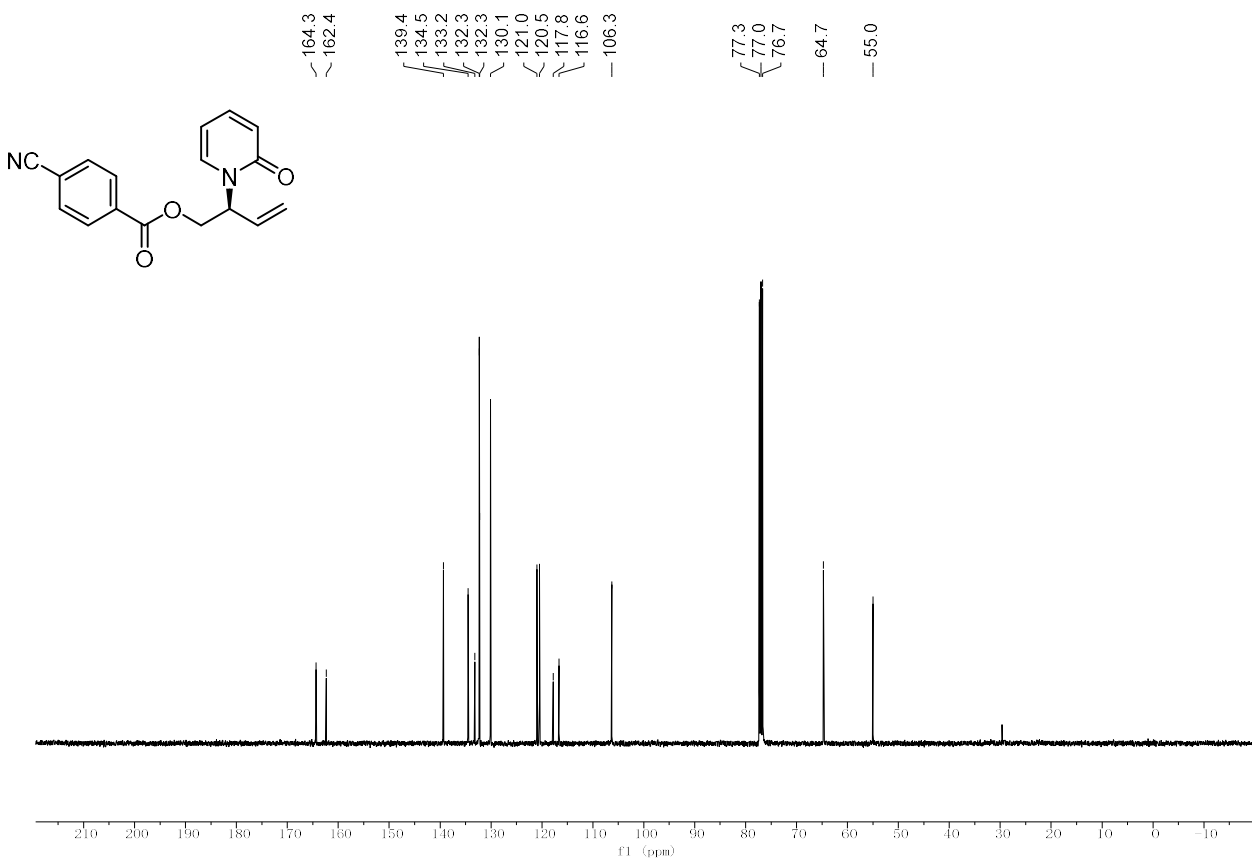

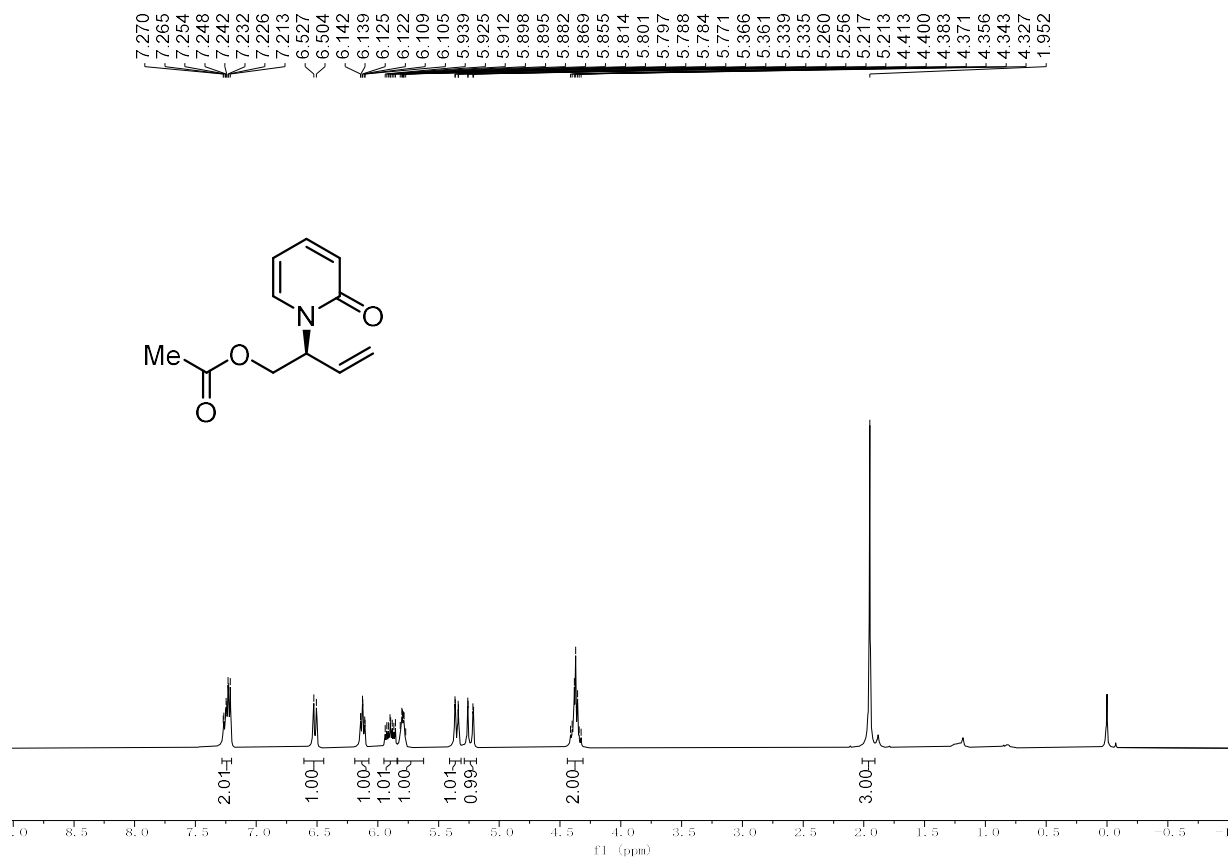

**<sup>1</sup>H NMR (400 MHz, CDCl<sub>3</sub>) of 3t**

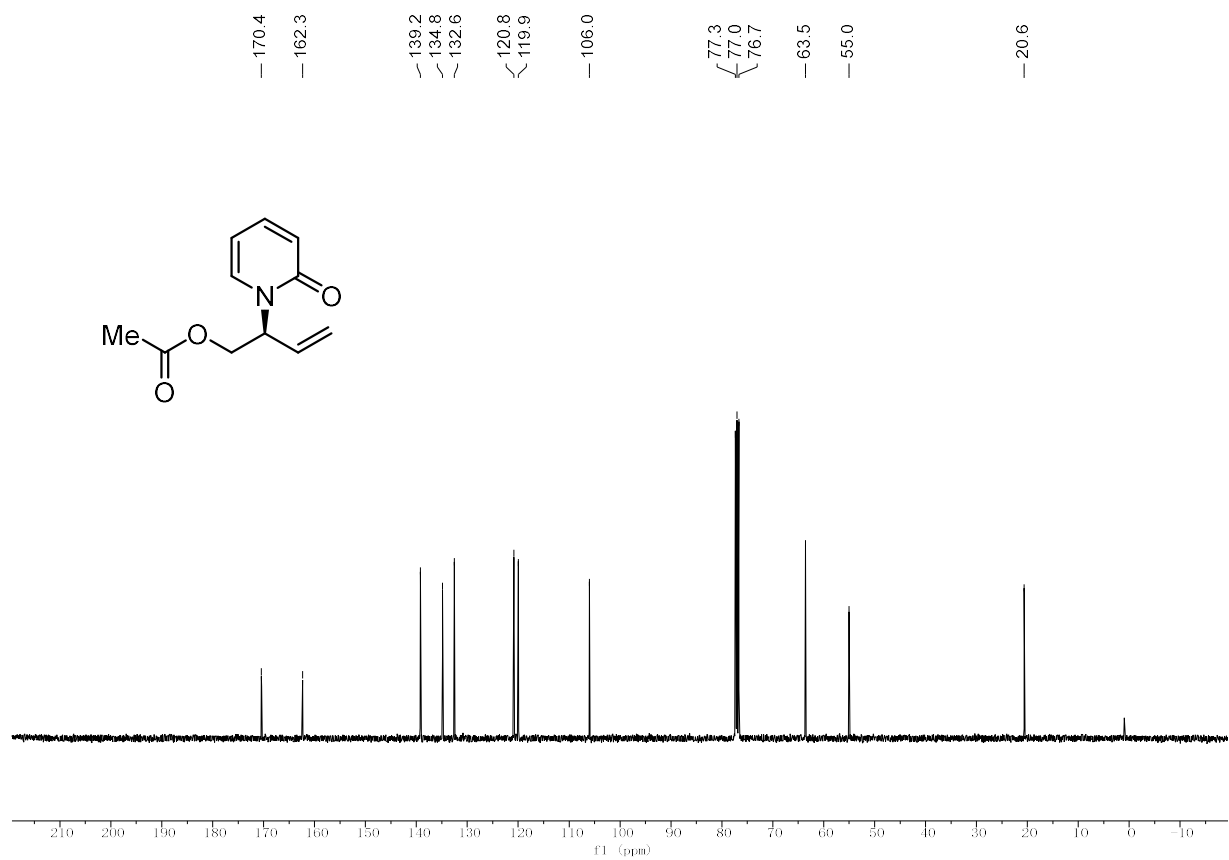

**<sup>13</sup>C NMR (101 MHz, CDCl<sub>3</sub>) of 3t**

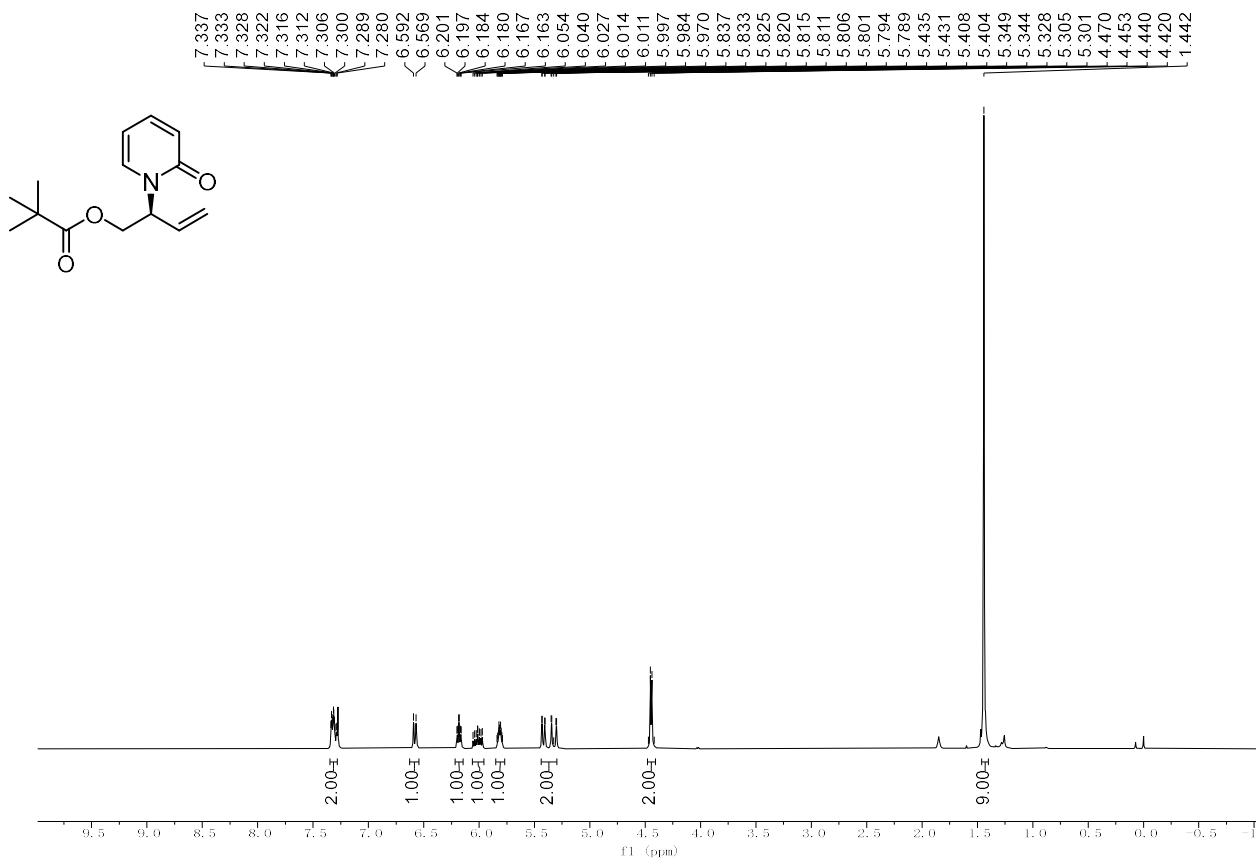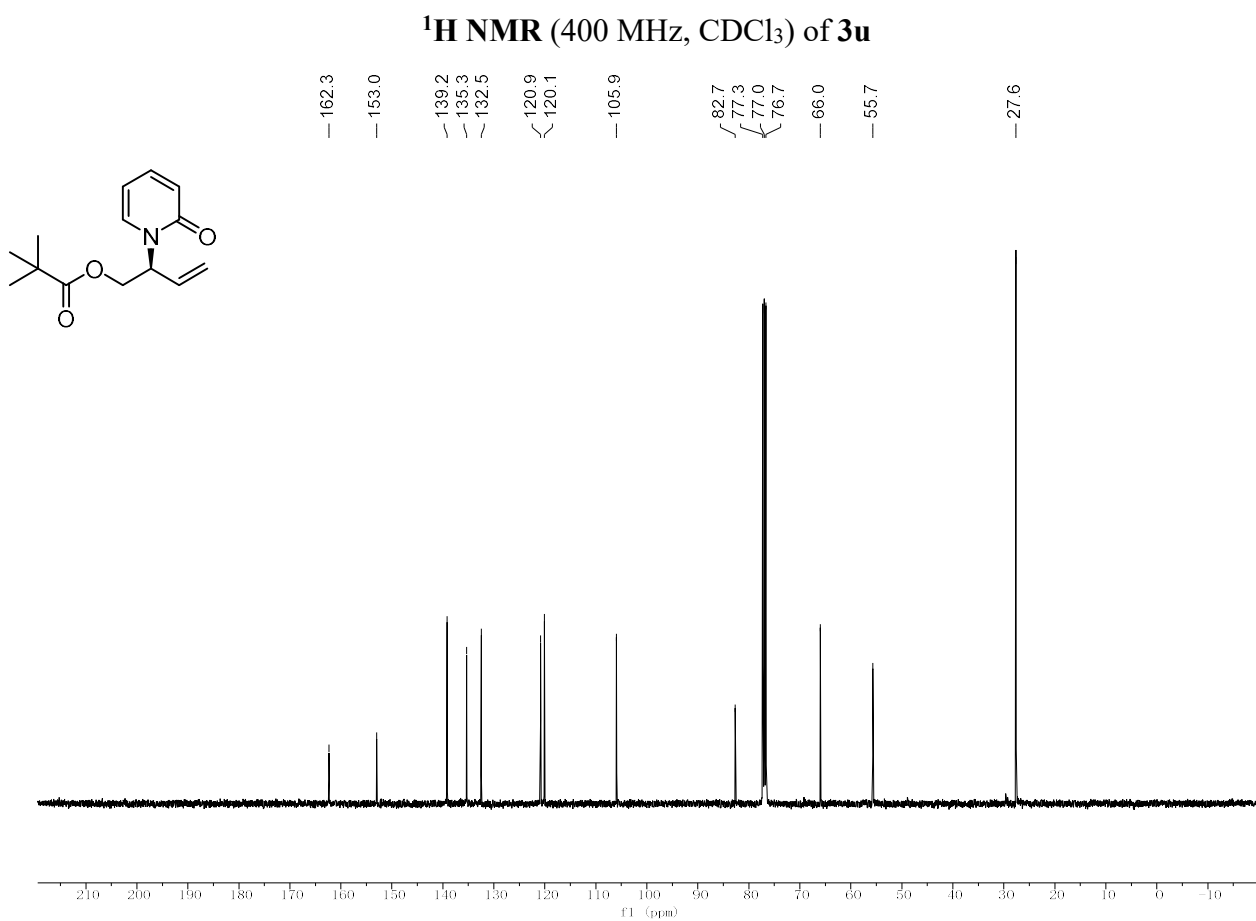

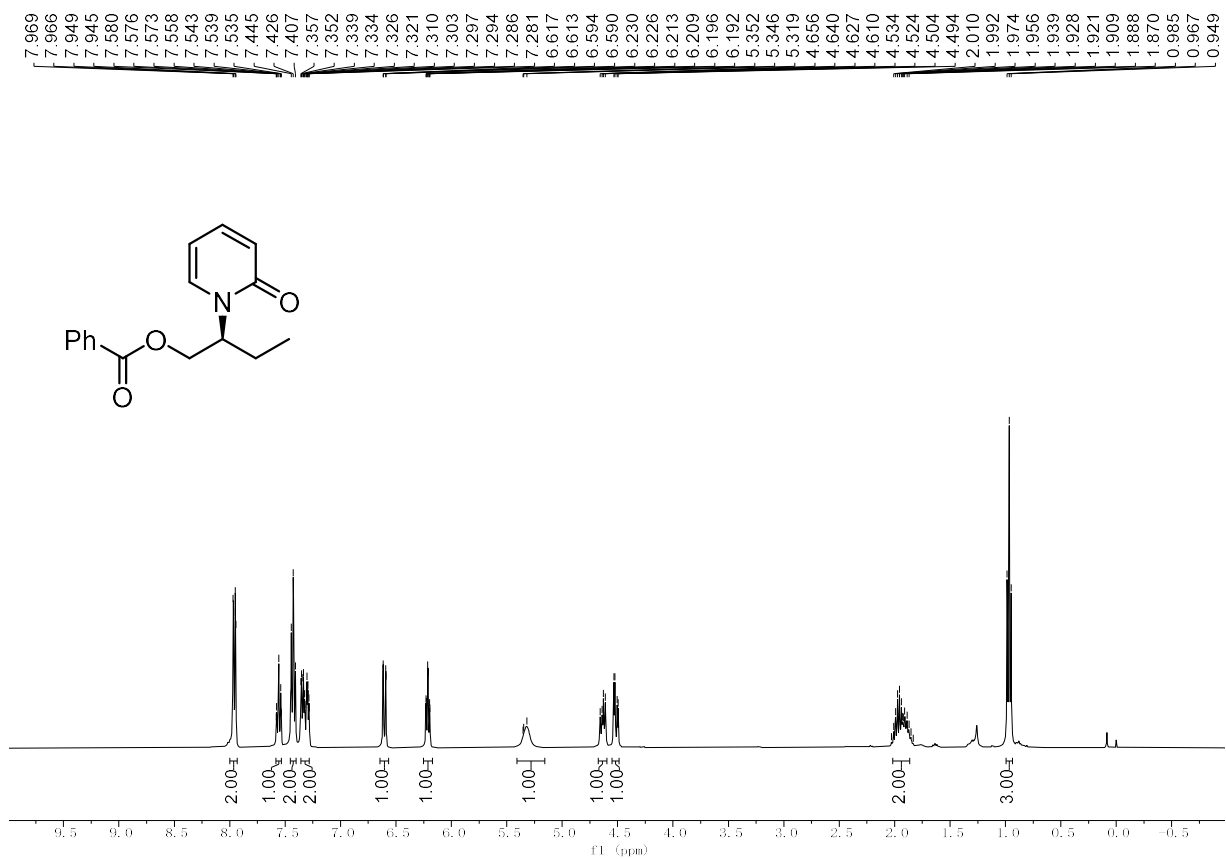

<sup>1</sup>H NMR (400 MHz, CDCl<sub>3</sub>) of **4**

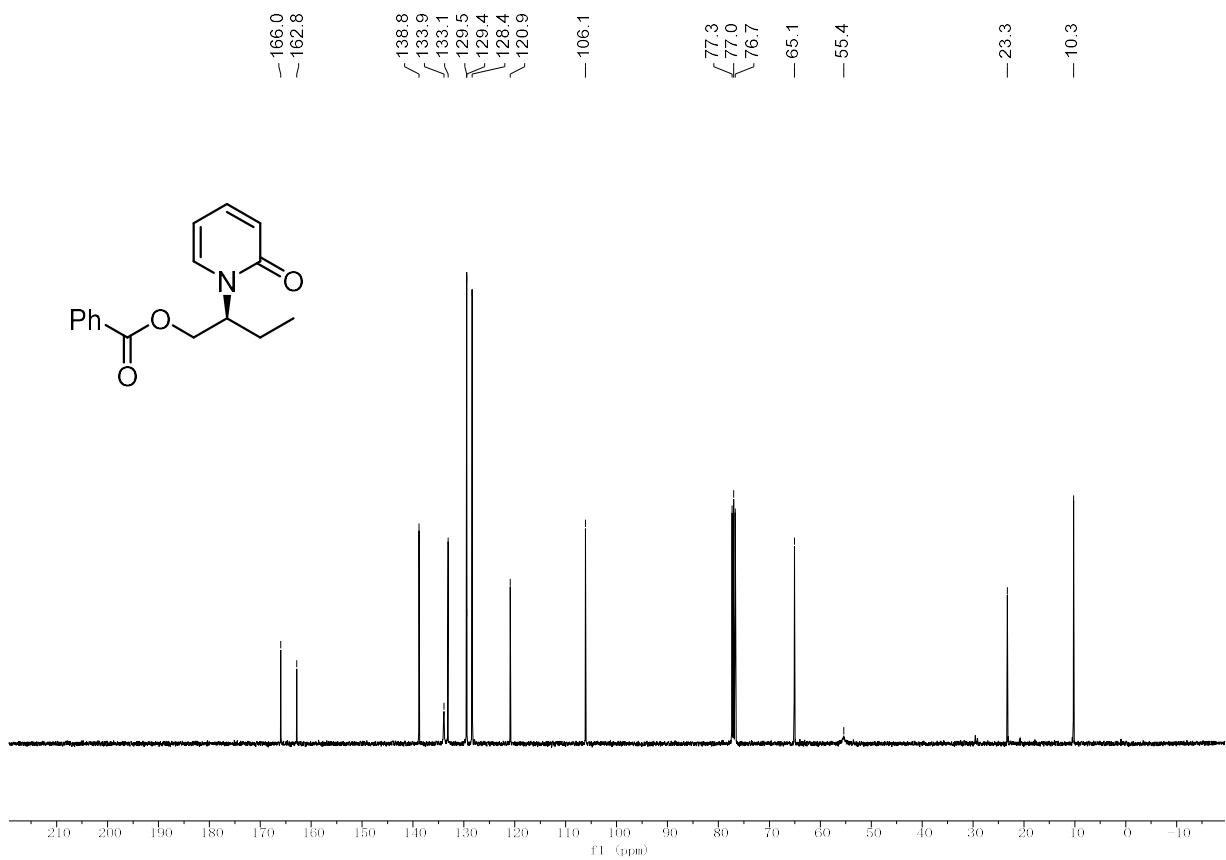

<sup>13</sup>C NMR (101 MHz, CDCl<sub>3</sub>) of **4**



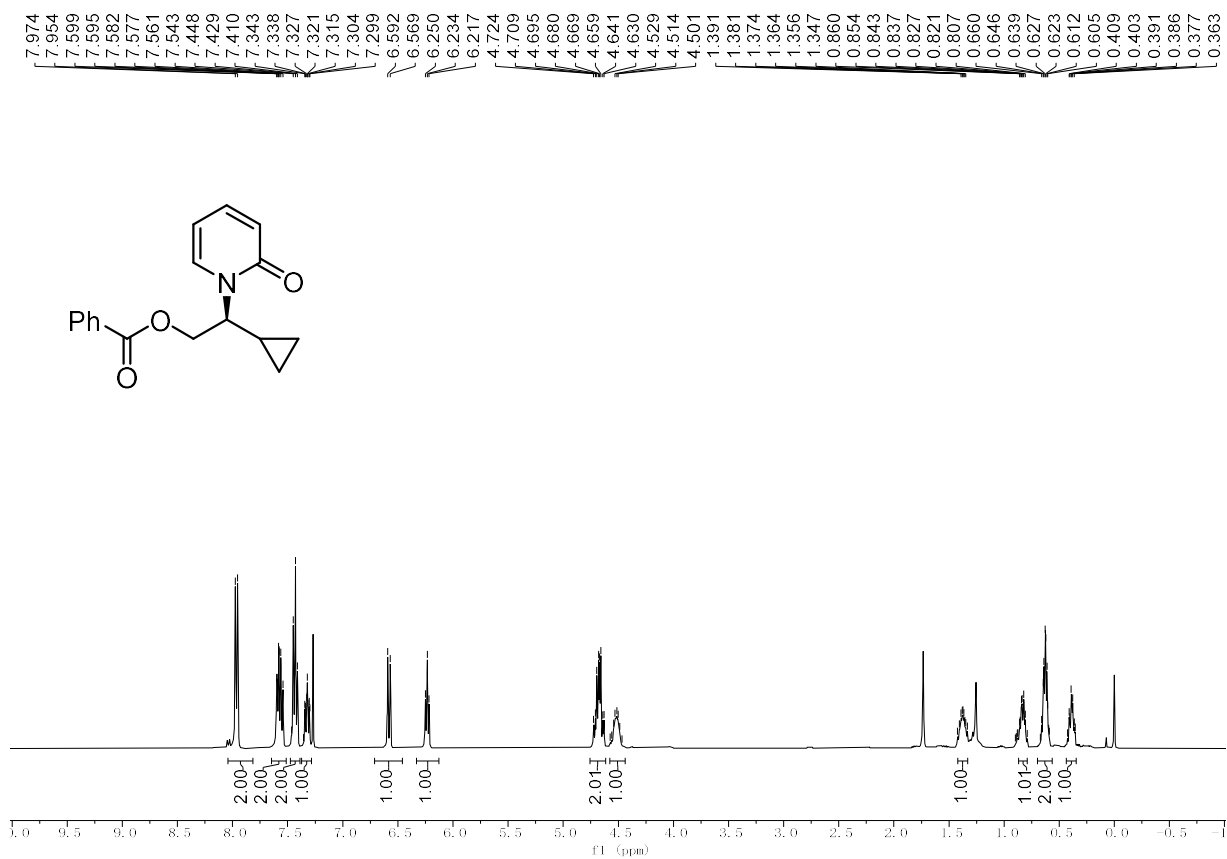

**<sup>1</sup>H NMR (400 MHz, CDCl<sub>3</sub>) of 6**

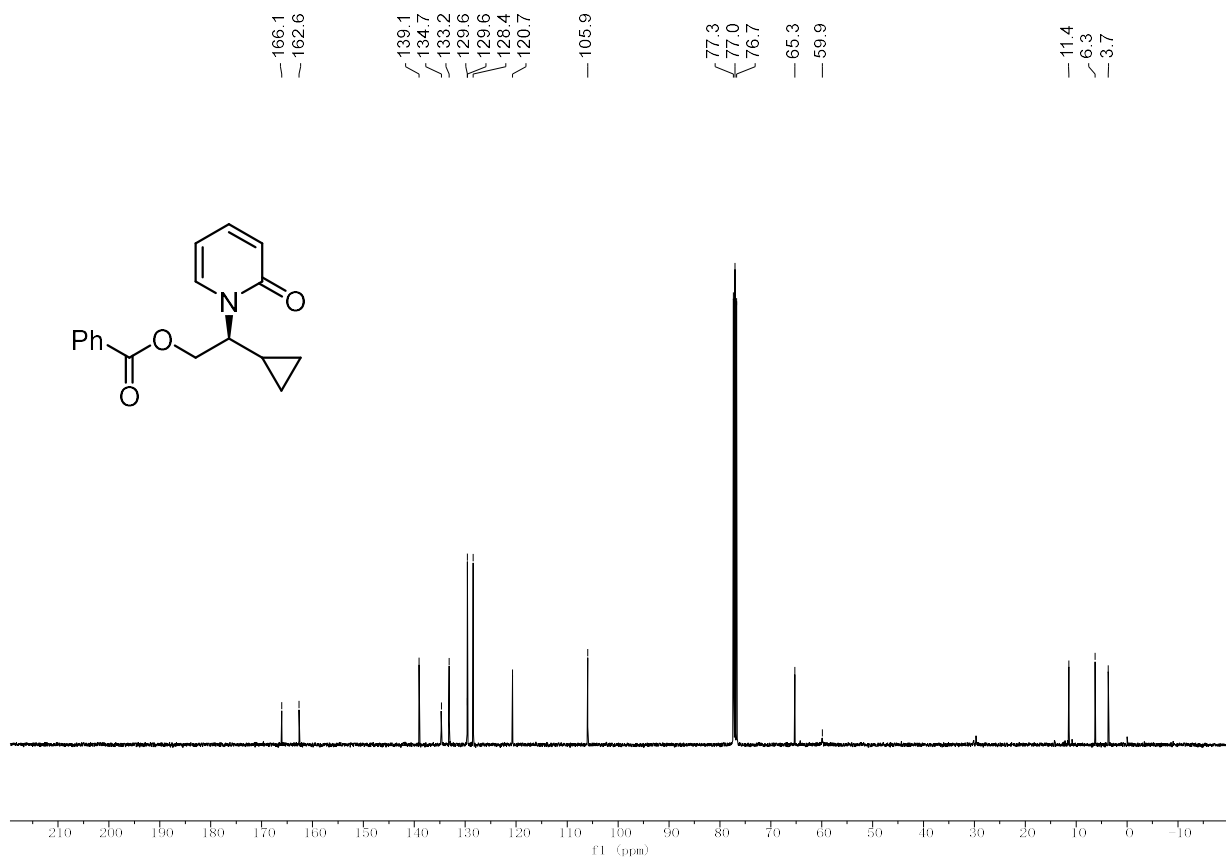

**<sup>13</sup>C NMR (101 MHz, CDCl<sub>3</sub>) of 6**

7.399  
7.394  
7.382  
7.377  
7.356  
7.351  
7.340  
7.334  
7.328  
7.317  
7.312  
6.582  
6.559  
6.258  
6.241  
6.224  
6.057  
6.043  
6.030  
6.015  
6.000  
5.987  
5.973  
5.609  
5.595  
5.581  
5.567  
5.419  
5.393  
5.324  
5.320  
5.280  
5.276  
4.063  
4.052  
4.040  
4.034  
4.022  
4.011  
3.969  
3.952  
3.936  
3.922  
3.906  
3.696  
3.681  
3.667

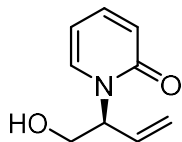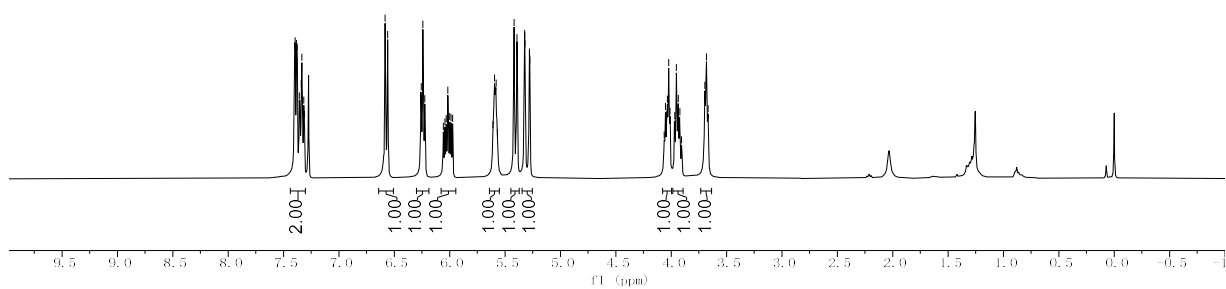

**<sup>1</sup>H NMR (400 MHz, CDCl<sub>3</sub>) of 7**

— 163.3  
 ~ 139.5  
 ~ 135.6  
 ~ 133.0  
 < 120.6  
 < 119.6  
 — 106.5  
 { 77.3  
 { 77.0  
 { 76.7  
 — 63.5  
 — 59.6

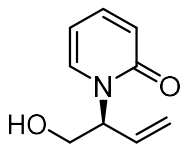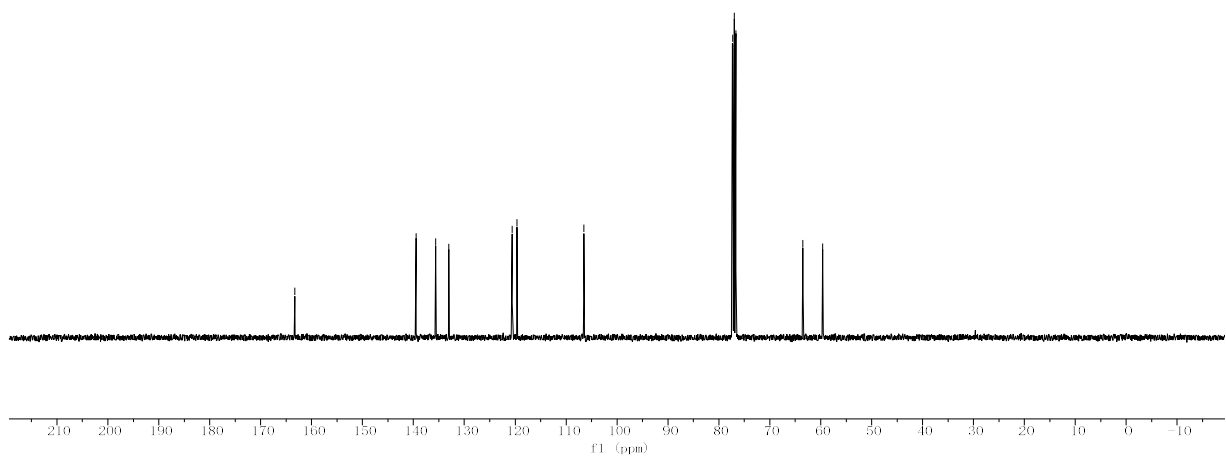

**<sup>13</sup>C NMR (101 MHz, CDCl<sub>3</sub>) of 7**

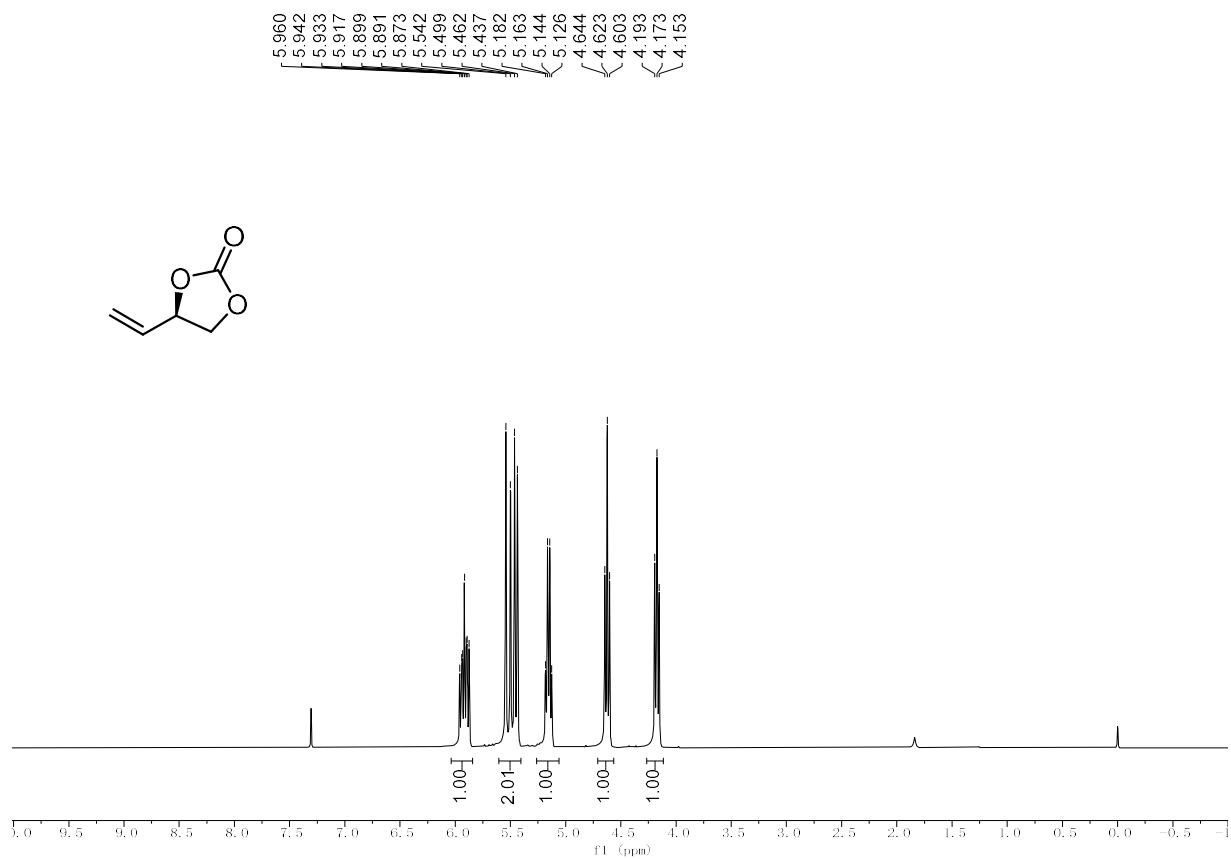

**<sup>1</sup>H NMR (400 MHz, CDCl<sub>3</sub>) of (R)-2**

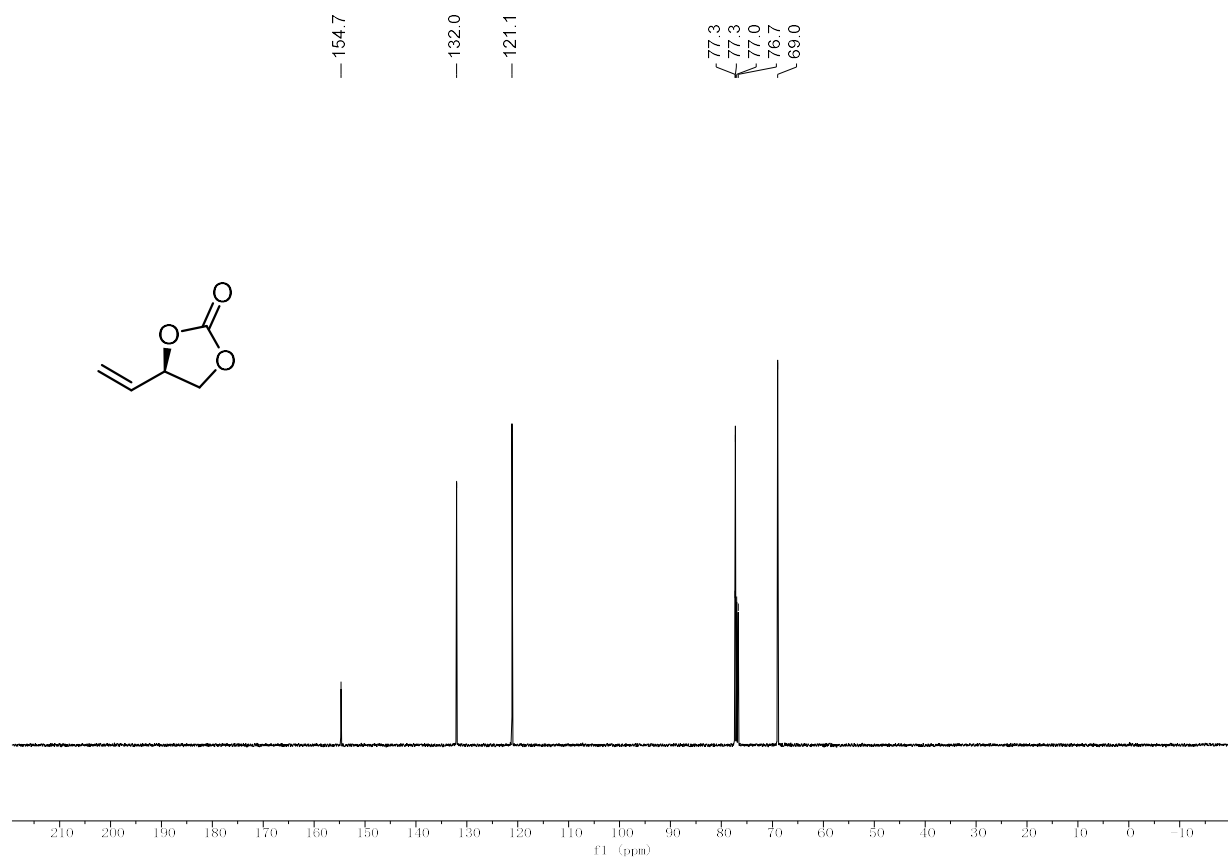

**<sup>13</sup>C NMR (101 MHz, CDCl<sub>3</sub>) of (R)-2**



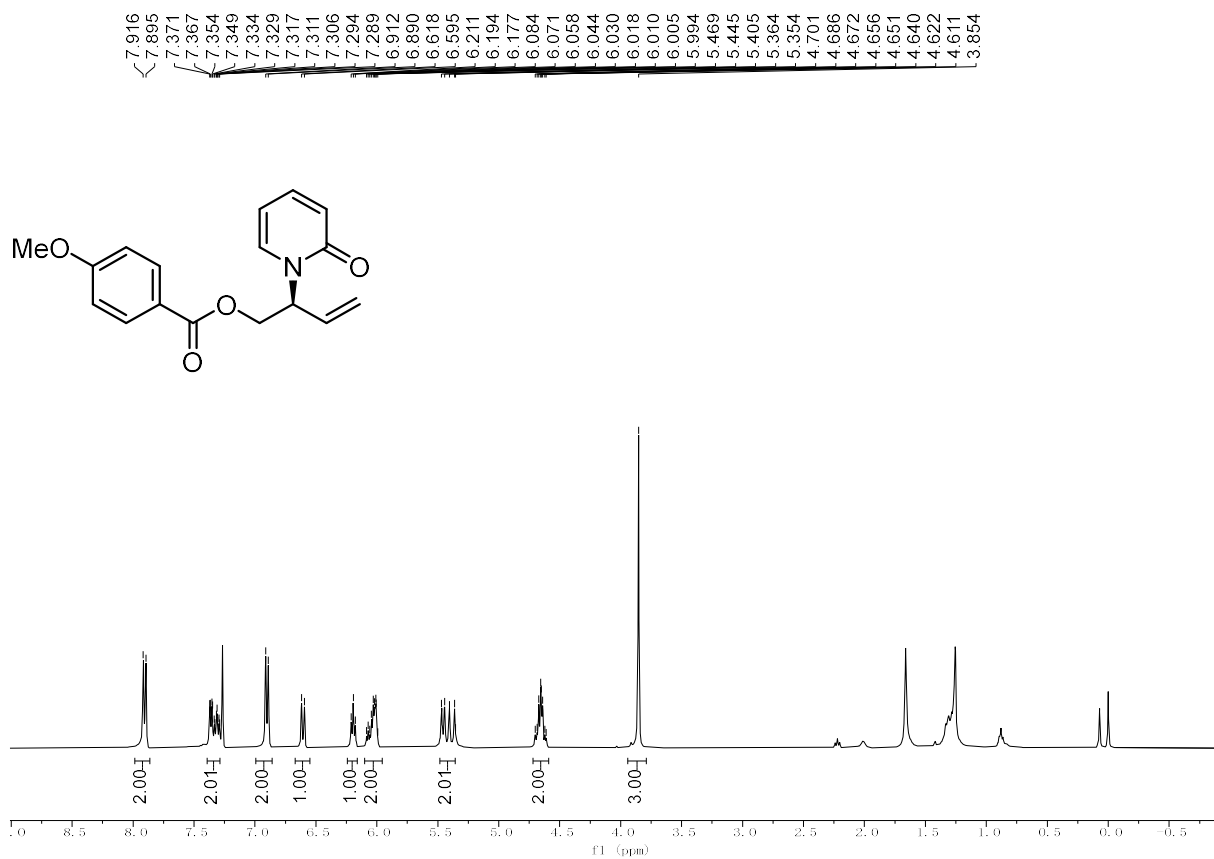

**<sup>1</sup>H NMR (400 MHz, CDCl<sub>3</sub>) of 3aq**

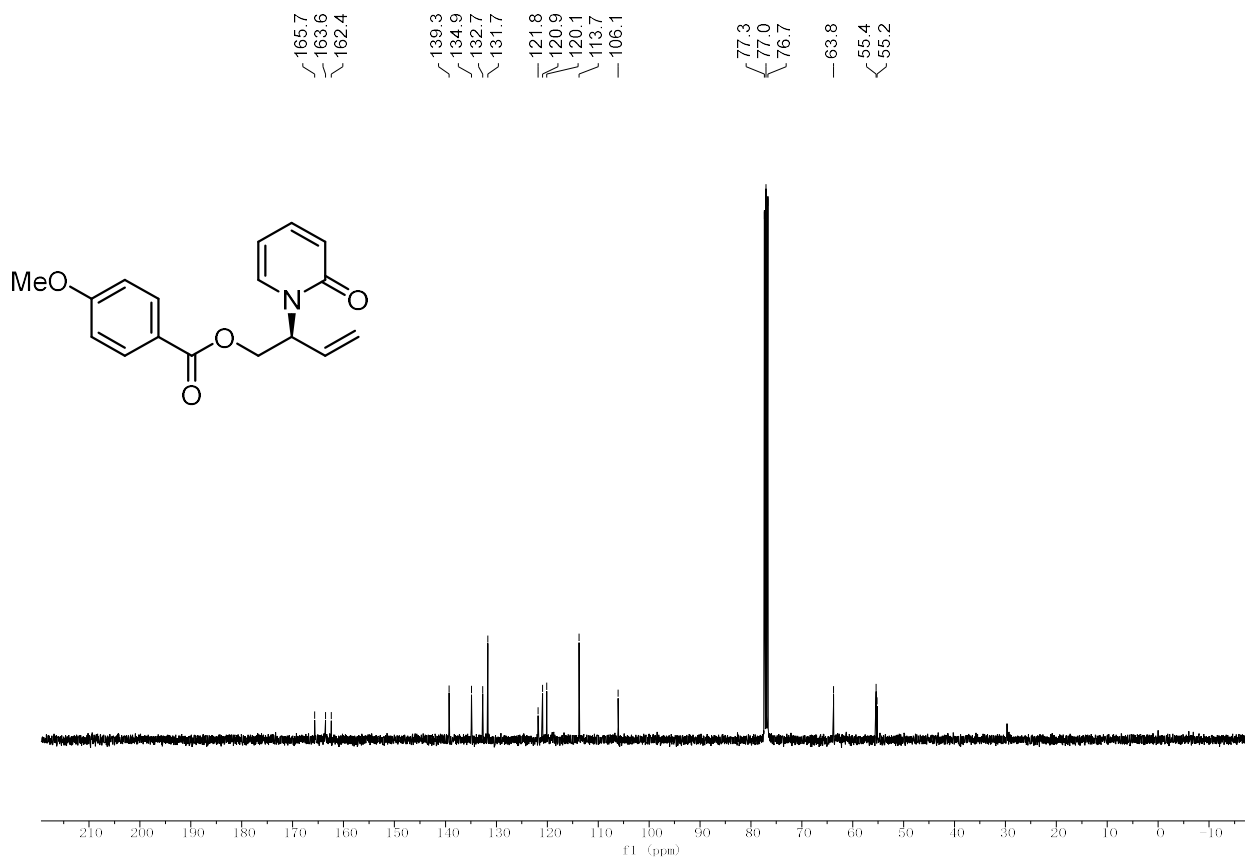

**<sup>13</sup>C NMR (101 MHz, CDCl<sub>3</sub>) of 3aq**
